# Supplementary material for: Rif1 inhibits replication fork progression and controls DNA copy number in Drosophila
Source: eLife. 2018 Oct 2;7:e39140. doi: 10.7554/eLife.39140 (PMC6185109; doi:10.7554/eLife.39140)
Supplement: Figure 1—figure supplement 2—source data 1. [file elife-39140-fig1-figsupp2-data1.xlsx]

## Sheet: Sheet1
SUUR mean intesity at EdU foci			SUUR sum intensity at heterochromatin
Wild type	SUUR deltaSNF		Wild type	SUUR deltaSNF
200.308	-46.877		84645.4	145182
909.518	-32.177		137860	146581
1698.98	167.363		1492900	153271
1795.58	252.973		298793	152006
2352.14	379.463		255877	135211
2599.13	406.053		70541.2	139841
3502.77	428.223		115396	139619
6148.1	521.713		186576	148820
6372.9	641.903		129788	134195
6618.49	664.853		145577	166367
6645.46	715.473		129020	150305
6695.24	750.053		277466	141495
8586.53	756.453		145503	155721
10042.2	757.213		180372	155875
11593.7	938.573		226324	178077
11995.6	963.773		161666	164019
1520.3	987.073		150784	154510
2490.58	993.483		107809	140331
5341.08	1026.68		178625	138136
4582.73	1167.28		116400	129073
2969.79	1174.08		99763.5	170676
4834.94	1216.83		113904	154934
3791.57	1270.04		168045	158478
3272.85	1333.87		216611	152343
3138.99	1480.58		201066	140105
1609.57	317.08		109866	150686
2969.44	273.74		101491	138124
10191.7	393.96		232376	177985
4440.74	327.84		117500	219274
3711.55	236.95		117099	189847
5734.77	216.91		201052	221845
2581.96	346.22		734734	294457
2361.61	604.3		576232	197274
283.904	429.6		270094	223897
2113.68	325.46		859400	255961
3934.66	266.34		261311	258669
3487.93	451.65		238568	278304
1248.04	189.3		386864	253572
1266.06	513.58		316397	267923
1421.51	331.32		212426	288844
2392.89	126.55			259755
3102.03	212.04			315666
4082.42	285.21			206134
1745.09	355.57			226938
5013.21	304.12
7681.31	413.32
2365.05	-0.77
3073.91	434.9
2278.67	258.68
2254.77	482.97
2427.28	393.42
3822.28	225.97
3381.49	504.13
1415.02	355.94
2814.86	320.26
1525.49	343.61
3208.24	588.04
1391.05	181.25
2774.4	118.95
964.754	305.73
1268.35	318.7
4648.91	153.66
1203.96	134.39
2067.19	653.3
	85.23
	389.22
	387.36
	240.62
	413.94
