# Supplementary material for: Rif1 inhibits replication fork progression and controls DNA copy number in Drosophila
Source: eLife. 2018 Oct 2;7:e39140. doi: 10.7554/eLife.39140 (PMC6185109; doi:10.7554/eLife.39140)
Supplement: Figure 1—source data 1. [file elife-39140-fig1-data1.xlsx]

## Sheet: Sheet1
	Wild type			SuUR			SuUR deltaSNF			SuUR gfpdeltaSNF
11A	0.314286	0.294802	0.239466	0.705621	0.771552	0.957955	0.811867	0.848588	0.847079	0.761468	0.854406	1.15695
35D	0.130314	0.119015	0.100719	0.892012	1.01207	1.01818	1.01013	0.968362	1.06357	0.950459	0.917625	1.21525
70C	0.225784	0.170315	0.144913	0.717456	0.798276	0.813636	0.791606	0.786441	0.915808	0.86055	0.758621	0.93722
3LHet	0.103136	0.107387	0.0976362	0.610947	0.581034	0.761364	0.435601	0.531073	0.690722	0.449541	0.434866	0.547085
