# Supplementary material for: Rif1 inhibits replication fork progression and controls DNA copy number in Drosophila
Source: eLife. 2018 Oct 2;7:e39140. doi: 10.7554/eLife.39140 (PMC6185109; doi:10.7554/eLife.39140)
Supplement: Figure 2—figure supplement 2—source data 1. [file elife-39140-fig2-figsupp2-data1.xlsx]

## Sheet: Sheet1
Wild type	Rif1-
90	80		*combined hatch rate assay for three biological replicates
100	80
90	100
90	90
100	80
90	90
90	100
90	90
100	80
100	80
100	80
90	90
100	90
100	80
90	80
100	90
90	100
90	90
100	80
100	80
100	90
90	90
90	90
60	90
90	90
90	80
90	80
80	100
90	100
90	90
