# Supplementary material for: Rif1 inhibits replication fork progression and controls DNA copy number in Drosophila
Source: eLife. 2018 Oct 2;7:e39140. doi: 10.7554/eLife.39140 (PMC6185109; doi:10.7554/eLife.39140)
Supplement: Figure 2—source data 1. [file elife-39140-fig2-data1.xlsx]

## Sheet: Sheet1
Identified Proteins (1049)	Accession Number	Molecular Weight	R1-FL-SUUR	R2-FL-SUUR	R3-FL-SUUR	R1-SNF2	R2-SNF2	R3-SNF2	R1-wild type	R2-wild type	R3-wild type
Elongation factor 1-alpha 1 OS=Drosophila melanogaster GN=Ef1alpha48D PE=1 SV=2	sp|P08736|EF1A1_DROME	50 kDa	159	94	92	130	106	99	79	55	44
Vitellogenin-3 OS=Drosophila melanogaster GN=Yp3 PE=1 SV=1	sp|P06607|VIT3_DROME	46 kDa	137	73	75	72	82	85	88	77	56
Dolichyl-diphosphooligosaccharide--protein glycosyltransferase 48 kDa subunit OS=Drosophila melanogaster GN=Ost48 PE=2 SV=2	sp|Q24319|OST48_DROME	50 kDa	126	97	61	101	86	104	99	57	52
Elongation factor 1-gamma OS=Drosophila melanogaster GN=Ef1gamma PE=2 SV=2	sp|Q9NJH0|EF1G_DROME	49 kDa	121	99	69	93	88	139	64	64	76
Elongation factor 2 OS=Drosophila melanogaster GN=Ef2b PE=2 SV=4	sp|P13060|EF2_DROME	94 kDa	95	77	65	81	67	81	63	62	42
Eukaryotic initiation factor 4B OS=Drosophila melanogaster GN=eIF-4B PE=2 SV=1	tr|Q7PLL3|Q7PLL3_DROME	52 kDa	91	73	38	69	66	74	77	74	51
Heat shock protein 83 OS=Drosophila melanogaster GN=Hsp83 PE=1 SV=1	sp|P02828|HSP83_DROME	82 kDa	77	60	31	59	48	68	45	46	41
Iron regulatory protein 1B OS=Drosophila melanogaster GN=Irp-1B PE=2 SV=1	tr|Q9VGZ3|Q9VGZ3_DROME	99 kDa	76	59	39	47	48	73	46	44	45
Heat shock 70 kDa protein cognate 4 OS=Drosophila melanogaster GN=Hsc70-4 PE=1 SV=3	sp|P11147|HSP7D_DROME	71 kDa	74	58	29	56	47	73	46	44	46
Vitellogenin-2 OS=Drosophila melanogaster GN=Yp2 PE=1 SV=2	sp|P02844|VIT2_DROME	50 kDa	68	42	32	49	52	54	54	39	46
Tubulin beta-1 chain OS=Drosophila melanogaster GN=betaTub56D PE=1 SV=2	sp|Q24560|TBB1_DROME	50 kDa	67	42	34	40	39	51	33	28	32
Vitellogenin-1 OS=Drosophila melanogaster GN=Yp1 PE=1 SV=1	sp|P02843|VIT1_DROME	49 kDa	64	37	19	43	43	42	52	45	33
Pyruvate kinase OS=Drosophila melanogaster GN=PyK PE=2 SV=2	sp|O62619|KPYK_DROME	57 kDa	50	44	28	35	29	37	32	29	25
LD20211p OS=Drosophila melanogaster GN=Tudor-SN PE=1 SV=1	tr|Q9W0S7|Q9W0S7_DROME	103 kDa	49	45	30	51	39	48	31	31	15
Apolipophorins OS=Drosophila melanogaster GN=Rfabg PE=1 SV=2	sp|Q9V496|APLP_DROME	373 kDa	47	41	20	42	39	36	50	32	15
Actin-5C OS=Drosophila melanogaster GN=Act5C PE=1 SV=4	sp|P10987|ACT1_DROME	42 kDa	46	32	26	34	26	29	31	25	23
CG8036, isoform B OS=Drosophila melanogaster GN=CG8036 PE=2 SV=3	tr|Q9VHN7|Q9VHN7_DROME	68 kDa	45	39	22	29	33	40	23	22	24
Heat shock 70 kDa protein cognate 3 OS=Drosophila melanogaster GN=Hsc70-3 PE=2 SV=2	sp|P29844|HSP7C_DROME	72 kDa	42	46	19	44	37	56	33	32	37
CG6370 OS=Drosophila melanogaster GN=CG6370 PE=2 SV=1	tr|Q7K110|Q7K110_DROME	69 kDa	39	43	31	41	38	64	41	35	35
Eukaryotic initiation factor 4A OS=Drosophila melanogaster GN=eIF-4a PE=2 SV=3	sp|Q02748|IF4A_DROME	46 kDa	39	32	17	40	26	29	36	24	17
Tubulin alpha-3 chain OS=Drosophila melanogaster GN=alphaTub84D PE=2 SV=1	sp|P06605|TBA3_DROME (+1)	50 kDa	39	35	26	31	26	37	24	17	22
Actin 57B, isoform C OS=Drosophila melanogaster GN=Act57B PE=3 SV=1	tr|E1JGP0|E1JGP0_DROME	40 kDa	38	27	25	24	24	27	28	23	21
40S ribosomal protein SA OS=Drosophila melanogaster GN=sta PE=1 SV=2	sp|P38979|RSSA_DROME	35 kDa	36	28	19	27	23	27	23	22	17
Protein disulfide-isomerase OS=Drosophila melanogaster GN=Pdi PE=2 SV=1	sp|P54399|PDI_DROME	56 kDa	36	39	27	36	35	44	29	29	23
Protein suppressor of underreplication OS=Drosophila melanogaster GN=SuUR PE=1 SV=3	sp|Q9VTE2|SUUR_DROME	108 kDa	36	48	26	21	18	10	1	1	2
ERp60 (Fragment) OS=Drosophila melanogaster GN=ERp60 PE=2 SV=1	tr|Q3YMU0|Q3YMU0_DROME	55 kDa	32	26	17	23	26	30	30	26	23
Transitional endoplasmic reticulum ATPase TER94 OS=Drosophila melanogaster GN=TER94 PE=1 SV=1	sp|Q7KN62|TERA_DROME	89 kDa	32	33	18	32	24	22	21	16	8
Enolase OS=Drosophila melanogaster GN=Eno PE=1 SV=2	sp|P15007|ENO_DROME	54 kDa	31	30	20	24	25	29	17	15	8
Glyceraldehyde-3-phosphate dehydrogenase 2 OS=Drosophila melanogaster GN=Gapdh2 PE=1 SV=2	sp|P07487|G3P2_DROME	35 kDa	31	42	25	36	31	31	32	21	25
BcDNA.GH04962 OS=Drosophila melanogaster GN=BcDNA.GH04962 PE=2 SV=1	tr|Q7KMM4|Q7KMM4_DROME	106 kDa	29	29	11	19	20	27	24	17	15
CG30085 OS=Drosophila melanogaster GN=CG30085 PE=2 SV=1	tr|Q9XZ34|Q9XZ34_DROME	157 kDa	29	24	14	1	0	0	0	0	0
Iron regulatory protein 1A OS=Drosophila melanogaster GN=Irp-1A PE=2 SV=1	tr|Q9VCV4|Q9VCV4_DROME	99 kDa	29	21		19	17	22	16	10	12
ATP-dependent RNA helicase bel OS=Drosophila melanogaster GN=bel PE=1 SV=1	sp|Q9VHP0|DDX3_DROME	85 kDa	28	22	9	16	14	18	10	7	2
GH24511p OS=Drosophila melanogaster GN=Uba1 PE=2 SV=1	tr|Q8T0L3|Q8T0L3_DROME	131 kDa	28	23	16	25	18	23	18	10	8
60S ribosomal protein L4 OS=Drosophila melanogaster GN=RpL4 PE=2 SV=2	sp|P09180|RL4_DROME	45 kDa	27	17	6	17	13	15	16	12	13
Adenosylhomocysteinase OS=Drosophila melanogaster GN=Ahcy13 PE=2 SV=2	sp|Q27580|SAHH_DROME	47 kDa	27	28	17	28	24	30	21	22	10
Probable elongation factor 1-beta OS=Drosophila melanogaster GN=Ef1beta PE=1 SV=3	sp|O96827|EF1B_DROME	24 kDa	27	25	13	20	20	18	18	13	11
Calcium-transporting ATPase sarcoplasmic/endoplasmic reticulum type OS=Drosophila melanogaster GN=Ca-P60A PE=1 SV=2	sp|P22700|ATC1_DROME	112 kDa	26	17	10	19	12	17	20	14	10
DNA topoisomerase 2 OS=Drosophila melanogaster GN=Top2 PE=1 SV=1	sp|P15348|TOP2_DROME	164 kDa	26	24	8	27	19	24	17	17	8
Glyceraldehyde-3-phosphate dehydrogenase 1 OS=Drosophila melanogaster GN=Gapdh1 PE=2 SV=2	sp|P07486|G3P1_DROME	35 kDa	26	32	18	21	19	22	22	14	16
Glycoprotein 93 OS=Drosophila melanogaster GN=Gp93 PE=2 SV=1	tr|Q9VAY2|Q9VAY2_DROME	90 kDa	26	20	13	24	24	24	23	15	12
Thioredoxin reductase 1, mitochondrial OS=Drosophila melanogaster GN=Trxr-1 PE=1 SV=2	sp|P91938|TRXR1_DROME	64 kDa	26	30	17	29	25	21	13	13	10
Tubulin beta-3 chain OS=Drosophila melanogaster GN=betaTub60D PE=2 SV=2	sp|P08841|TBB3_DROME	51 kDa	26	21	10	24	27	30	18	15
CG33303 OS=Drosophila melanogaster GN=CG33303 PE=2 SV=1	tr|Q76NQ0|Q76NQ0_DROME	52 kDa	25	17	12	15	21	30	17	15	12
CG7033, isoform A OS=Drosophila melanogaster GN=CG7033 PE=2 SV=2	tr|Q9W392|Q9W392_DROME	58 kDa	25	28	12	21	19	26	23	19	8
Growl, isoform B (Fragment) OS=Drosophila melanogaster GN=lost PE=2 SV=2	tr|Q8IPM3|Q8IPM3_DROME (+1)	59 kDa	25	23	7	20	15	17	15	14	9
Hsc70Cb, isoform A OS=Drosophila melanogaster GN=Hsc70Cb PE=2 SV=1	tr|Q9VUC1|Q9VUC1_DROME	89 kDa	25	23	10	19	17	18	18	13	10
Actin, indirect flight muscle OS=Drosophila melanogaster GN=Act88F PE=1 SV=1	sp|P83967|ACT6_DROME	42 kDa	24		20	19	17	22	21	16
CG5355 OS=Drosophila melanogaster GN=CG5355 PE=2 SV=2	tr|Q9VKW5|Q9VKW5_DROME	86 kDa	24	19	6	14	15	13	6	8	2
Ribonucleoside-diphosphate reductase large subunit OS=Drosophila melanogaster GN=RnrL PE=1 SV=2	sp|P48591|RIR1_DROME	92 kDa	24	19	11	14	15	14	15	7	6
40S ribosomal protein S4 OS=Drosophila melanogaster GN=RpS4 PE=2 SV=2	sp|P41042|RS4_DROME	29 kDa	23	15	12	15	14	26	17	12	19
60S ribosomal protein L10a-2 OS=Drosophila melanogaster GN=RpL10Ab PE=2 SV=2	sp|Q9VTP4|R10AB_DROME	24 kDa	23	21	10	19	20	16	13	12	8
BcDNA.LD23634 OS=Drosophila melanogaster GN=BcDNA.LD23634 PE=2 SV=1	tr|Q9V3Y5|Q9V3Y5_DROME	113 kDa	23	21	3	19	13	13	12	9	9
CG2918, isoform A OS=Drosophila melanogaster GN=EG:25E8.1 PE=2 SV=1	tr|O46067|O46067_DROME	103 kDa	23	23	15	19	18	21	13	13	5
CG9302 OS=Drosophila melanogaster GN=CG9302 PE=2 SV=1	tr|Q9VJZ1|Q9VJZ1_DROME	58 kDa	23	33	14	26	25	21	29	22	13
Guanine nucleotide-binding protein subunit beta-like protein OS=Drosophila melanogaster GN=Rack1 PE=2 SV=2	sp|O18640|GBLP_DROME	36 kDa	23	18	14	21	18	22	17	17	10
Probable elongation factor 1-delta OS=Drosophila melanogaster GN=eEF1delta PE=1 SV=1	sp|Q9VL18|EF1D_DROME	29 kDa	23	16	12	15	10	20	11	12	13
40S ribosomal protein S2 OS=Drosophila melanogaster GN=RpS2 PE=1 SV=2	sp|P31009|RS2_DROME	29 kDa	22	15	14	16	15	18	12	12	15
CG1371 OS=Drosophila melanogaster GN=CG1371 PE=4 SV=1	tr|A1Z843|A1Z843_DROME	131 kDa	22	24	11	21	19	28	27	15	14
Eukaryotic translation initiation factor 3 subunit C OS=Drosophila melanogaster GN=eIF3-S8 PE=1 SV=1	sp|A1ZAX1|EIF3C_DROME	106 kDa	22	15	5	16	14	12	15	8	6
26S proteasome non-ATPase regulatory subunit 1 OS=Drosophila melanogaster GN=Rpn2 PE=1 SV=1	sp|Q9V3P6|PSMD1_DROME	113 kDa	21	18	4	19	11	10	15	9	2
Eukaryotic translation initiation factor 3 subunit A OS=Drosophila melanogaster GN=eIF3-S10 PE=1 SV=1	sp|Q9VN25|EIF3A_DROME	134 kDa	21	14	2	17	16	17	14	16	6
Glycogen phosphorylase OS=Drosophila melanogaster GN=GlyP PE=2 SV=2	sp|Q9XTL9|PYG_DROME (+1)	97 kDa	21	24	13	19	18	32	20	14	14
Importin subunit alpha OS=Drosophila melanogaster GN=Pen PE=1 SV=2	sp|P52295|IMA_DROME	58 kDa	21	18	6	11	6	6	10	7	3
Nucleoside diphosphate kinase OS=Drosophila melanogaster GN=awd PE=1 SV=3	sp|P08879|NDKA_DROME	17 kDa	21	17	15	20	19	27	16	15	13
T-complex protein 1 subunit gamma OS=Drosophila melanogaster GN=Cctgamma PE=2 SV=2	sp|P48605|TCPG_DROME (+1)	59 kDa	21	16	10	22	20	17	17	10	7
Alcohol dehydrogenase OS=Drosophila melanogaster GN=Adh PE=1 SV=2	sp|P00334|ADH_DROME	28 kDa	20	19	9	16	13	14	12	14	9
Dodeca-satellite-binding protein 1, isoform A OS=Drosophila melanogaster GN=Dp1 PE=2 SV=1	tr|Q7KN75|Q7KN75_DROME	144 kDa	20	20	5	18	15	12	16	12	4
GM12270p OS=Drosophila melanogaster GN=Cct5 PE=2 SV=1	tr|Q7KKI0|Q7KKI0_DROME	59 kDa	20	18	9	19	11	12	8	9	3
14-3-3 protein epsilon OS=Drosophila melanogaster GN=14-3-3epsilon PE=1 SV=2	sp|P92177|1433E_DROME	30 kDa	19	13	8	10	10	15	11	10	4
60S ribosomal protein L3 OS=Drosophila melanogaster GN=RpL3 PE=2 SV=3	sp|O16797|RL3_DROME	47 kDa	19	15	5	8	14	14	12	5	4
CG8258 OS=Drosophila melanogaster GN=CG8258 PE=2 SV=1	tr|Q7K3J0|Q7K3J0_DROME	59 kDa	19	16	7	18	13	14	13	13	8
D-Importin 7/RanBP7 OS=Drosophila melanogaster GN=msk PE=2 SV=1	tr|Q9VSD6|Q9VSD6_DROME	119 kDa	19	7	3	7	5	8	7	1	0
DNA replication licensing factor Mcm2 OS=Drosophila melanogaster GN=Mcm2 PE=1 SV=1	sp|P49735|MCM2_DROME	100 kDa	19	11	3	11	6	3	3	3	0
LD47396p OS=Drosophila melanogaster GN=Tcp-1eta PE=2 SV=2	tr|Q9VHL2|Q9VHL2_DROME	59 kDa	19	18	11	12	10	16	11	7	6
Arc1 OS=Drosophila melanogaster GN=Arc1 PE=2 SV=1	tr|Q7K1U0|Q7K1U0_DROME	29 kDa	18	13	13	7	9	13	5	8	4
ATP citrate lyase, isoform D OS=Drosophila melanogaster GN=ATPCL PE=2 SV=1	tr|Q7KN85|Q7KN85_DROME	121 kDa	18	17	3	19	18	14	10	6	1
CG9674, isoform A OS=Drosophila melanogaster GN=CG9674 PE=2 SV=2	tr|Q9VVA4|Q9VVA4_DROME	232 kDa	18	13	2	14	11	14	12	9	1
Eukaryotic translation initiation factor 4G, isoform B OS=Drosophila melanogaster GN=eIF4G PE=4 SV=1	tr|A8DZ29|A8DZ29_DROME	211 kDa	18	12	4	20	10	12	13	9	2
GDP dissociation inhibitor OS=Drosophila melanogaster GN=Gdi PE=2 SV=1	tr|Q9VLB7|Q9VLB7_DROME	50 kDa	18	19	11	19	13	15	10	14	5
GH13725p OS=Drosophila melanogaster GN=Tcp-1zeta PE=2 SV=1	tr|Q9VXQ5|Q9VXQ5_DROME	58 kDa	18	14	5	19	10	19	13	9	6
Peroxiredoxin 1 OS=Drosophila melanogaster GN=Jafrac1 PE=1 SV=1	sp|Q9V3P0|PRDX1_DROME	22 kDa	18	18	10	17	13	17	11	12	11
Translationally-controlled tumor protein homolog OS=Drosophila melanogaster GN=Tctp PE=1 SV=1	sp|Q9VGS2|TCTP_DROME	20 kDa	18	9	7	10	11	14	6	6	4
Tripeptidyl-peptidase 2 OS=Drosophila melanogaster GN=TppII PE=1 SV=2	sp|Q9V6K1|TPP2_DROME	159 kDa	18	19	4	15	11	11	12	9	3
Eukaryotic translation initiation factor 3 subunit E OS=Drosophila melanogaster GN=eIF3-S6 PE=2 SV=1	sp|O77410|EIF3E_DROME	51 kDa	17	15	8	12	13	11	13	12	3
Eukaryotic translation initiation factor 5A OS=Drosophila melanogaster GN=eIF-5A PE=2 SV=2	sp|Q9GU68|IF5A_DROME	18 kDa	17	11	5	10	9	6	12	2	2
Heat shock protein 26 OS=Drosophila melanogaster GN=Hsp26 PE=1 SV=2	sp|P02517|HSP26_DROME	23 kDa	17	18	5	19	23	16	14	9	6
Isocitrate dehydrogenase [NADP] OS=Drosophila melanogaster GN=Idh PE=2 SV=2	tr|Q9VSI6|Q9VSI6_DROME	50 kDa	17	14	7	19	16	13	13	11	5
Peptidyl-prolyl cis-trans isomerase OS=Drosophila melanogaster GN=Cyp1 PE=1 SV=2	sp|P25007|PPIA_DROME	25 kDa	17	9	5	11	13	13	15	12	10
Phosphoglycerate kinase OS=Drosophila melanogaster GN=Pgk PE=2 SV=2	sp|Q01604|PGK_DROME	44 kDa	17	9	6	10	11	11	10	8	2
Polyadenylate-binding protein OS=Drosophila melanogaster GN=pAbp PE=1 SV=3	sp|P21187|PABP_DROME	70 kDa	17	14	4	14	16	11	15	12	5
Tubulin alpha-4 chain OS=Drosophila melanogaster GN=alphaTub67C PE=3 SV=1	sp|P06606|TBA4_DROME	51 kDa	17	14	10	12	9	14	12	7	7
40S ribosomal protein S3a OS=Drosophila melanogaster GN=RpS3A PE=2 SV=4	sp|P55830|RS3A_DROME (+1)	30 kDa	16	9	5	12	6	10	6	10	9
60S acidic ribosomal protein P0 OS=Drosophila melanogaster GN=RpLP0 PE=1 SV=1	sp|P19889|RLA0_DROME	34 kDa	16	20	10	16	11	19	9	8	11
Alanine--tRNA ligase, cytoplasmic OS=Drosophila melanogaster GN=Aats-ala PE=2 SV=1	sp|Q9VLM8|SYAC_DROME	108 kDa	16	14	3	10	14	12	13	9	5
ATP-dependent RNA helicase p62 OS=Drosophila melanogaster GN=Rm62 PE=1 SV=3	sp|P19109|DDX17_DROME	79 kDa	16	16	6	22	19	18	4	6	3
CG10576, isoform A OS=Drosophila melanogaster GN=CG10576 PE=2 SV=1	tr|Q9VRP2|Q9VRP2_DROME	43 kDa	16	13	9	16	8	12	6	12	6
CG2943 OS=Drosophila melanogaster GN=CG2943 PE=2 SV=1	tr|Q9VHY6|Q9VHY6_DROME	101 kDa	16	16	12	12	11	20	18	12	8
Eukaryotic translation initiation factor 3 subunit B OS=Drosophila melanogaster GN=eIF3-S9 PE=1 SV=1	sp|Q0E940|EIF3B_DROME (+1)	80 kDa	16	8	3	15	11	12	5	7	3
FI07923p OS=Drosophila melanogaster GN=Karybeta3 PE=2 SV=1	tr|Q9VN44|Q9VN44_DROME	124 kDa	16	14	3	17	15	5	9	8	2
Serine/threonine-protein phosphatase PP2A 65 kDa regulatory subunit OS=Drosophila melanogaster GN=Pp2A-29B PE=2 SV=4	sp|P36179|2AAA_DROME	65 kDa	16	15	5	15	15	5	10	9	3
V-type proton ATPase catalytic subunit A isoform 2 OS=Drosophila melanogaster GN=Vha68-2 PE=1 SV=2	sp|Q27331|VATA2_DROME (+1)	68 kDa	16	19	8	19	18	12	16	17	8
V-type proton ATPase subunit B OS=Drosophila melanogaster GN=Vha55 PE=2 SV=1	sp|P31409|VATB_DROME (+1)	55 kDa	16	14	4	16	9	15	12	11	5
40S ribosomal protein S14 OS=Drosophila melanogaster GN=RpS14a PE=1 SV=1	sp|P14130|RS14_DROME	16 kDa	15	14	10	16	13	17	15	10	6
40S ribosomal protein S3 OS=Drosophila melanogaster GN=RpS3 PE=1 SV=1	sp|Q06559|RS3_DROME	27 kDa	15	16	5	15	13	21	13	15	6
40S ribosomal protein S7 OS=Drosophila melanogaster GN=RpS7 PE=2 SV=1	sp|Q9VA91|RS7_DROME	22 kDa	15	16	9	15	14	15	13	9	6
CG11089 OS=Drosophila melanogaster GN=CG11089 PE=2 SV=1	tr|Q9VC18|Q9VC18_DROME	63 kDa	15	15	5	13	11	10	7	4	6
CG15100 OS=Drosophila melanogaster GN=CG15100 PE=3 SV=1	tr|A1ZBE9|A1ZBE9_DROME	112 kDa	15	10	4	15	10	2	9	5	0
Dipeptidyl peptidase 3 OS=Drosophila melanogaster GN=DppIII PE=2 SV=2	sp|Q9VHR8|DPP3_DROME	89 kDa	15	7	5	12	4	6	9	6	3
DNA replication licensing factor Mcm7 OS=Drosophila melanogaster GN=Mcm7 PE=1 SV=1	sp|Q9XYU0|MCM7_DROME	81 kDa	15	8	3	7	5	1	4	1	0
Heat shock protein 27 OS=Drosophila melanogaster GN=Hsp27 PE=1 SV=2	sp|P02518|HSP27_DROME	24 kDa	15	13	7	14	13	9	12	8	3
Isoleucyl-tRNA synthetase, isoform A OS=Drosophila melanogaster GN=Aats-ile PE=2 SV=1	tr|Q8MSW0|Q8MSW0_DROME	141 kDa	15	16	6	17	11	12	13	9	4
Lamin Dm0 OS=Drosophila melanogaster GN=Lam PE=1 SV=4	sp|P08928|LAM0_DROME	71 kDa	15	13	4	9	9	6	11	5	3
Spindly OS=Drosophila melanogaster GN=Spindly PE=2 SV=2	tr|Q9VQS4|Q9VQS4_DROME	89 kDa	15	15	5	8	6	4	8	8	2
T-complex protein 1 subunit delta OS=Drosophila melanogaster GN=CG5525 PE=2 SV=1	tr|Q9VK69|Q9VK69_DROME	57 kDa	15	14	8	13	11	8	10	5	6
UDP-glucose:glycoprotein glucosyltransferase OS=Drosophila melanogaster GN=Ugt PE=1 SV=2	sp|Q09332|UGGG_DROME	174 kDa	15	25	17	25	19	31	15	21	14
CG1518 OS=Drosophila melanogaster GN=CG1518 PE=2 SV=1	tr|Q9VRE0|Q9VRE0_DROME	81 kDa	14	15	4	11	10	8	12	9	5
CG17337 OS=Drosophila melanogaster GN=CG17337 PE=2 SV=1	tr|Q8MT58|Q8MT58_DROME	53 kDa	14	10	4	12	10	11	9	7	3
CG2915, isoform A OS=Drosophila melanogaster GN=CG2915 PE=2 SV=1	tr|Q0E9F9|Q0E9F9_DROME	51 kDa	14	13	9	7	8	10	10	9	9
Exportin-1 OS=Drosophila melanogaster GN=emb PE=1 SV=1	sp|Q9TVM2|XPO1_DROME	123 kDa	14	12	3	14	12	4	10	10	1
FI05224p OS=Drosophila melanogaster GN=Aats-thr PE=2 SV=2	tr|Q9VKB0|Q9VKB0_DROME	86 kDa	14	18	6	11	10	16	10	8	6
Fructose-bisphosphate aldolase OS=Drosophila melanogaster GN=Ald PE=1 SV=5	sp|P07764|ALF_DROME	39 kDa	14	15	7	17	11	15	11	8	7
Glucose-6-phosphate isomerase OS=Drosophila melanogaster GN=Pgi PE=2 SV=2	sp|P52029|G6PI_DROME	62 kDa	14	15	5	10	10	12	11	8	2
LD21576p OS=Drosophila melanogaster GN=Nap1 PE=2 SV=1	tr|Q9W1G7|Q9W1G7_DROME	43 kDa	14	16	4	11	7	13	10	7	6
Major heat shock 70 kDa protein Ab OS=Drosophila melanogaster GN=Hsp70Ab PE=2 SV=3	sp|P02825|HSP71_DROME (+1)	70 kDa	14	20	8	14	12		8	10	5
Nat1 OS=Drosophila melanogaster GN=Nat1 PE=2 SV=1	tr|Q9VWI2|Q9VWI2_DROME	103 kDa	14	21	4	21	13	7	17	12	4
Proteasome subunit beta type OS=Drosophila melanogaster GN=Prosbeta1 PE=2 SV=1	tr|A0AQH0|A0AQH0_DROME	24 kDa	14	11	4	11	7	7	6	5	5
RNA-binding protein squid OS=Drosophila melanogaster GN=sqd PE=1 SV=3	sp|Q08473|SQD_DROME	36 kDa	14	10	3	11	8	10	7	8	6
Rumpelstiltskin OS=Drosophila melanogaster GN=rump PE=2 SV=1	tr|Q9VHC7|Q9VHC7_DROME	67 kDa	14	15	2	14	12	14	10	4	2
T-complex protein 1 subunit alpha OS=Drosophila melanogaster GN=T-cp1 PE=2 SV=2	sp|P12613|TCPA_DROME (+1)	60 kDa	14	11	8	13	10	14	11	9	5
60S ribosomal protein L22 OS=Drosophila melanogaster GN=RpL22 PE=1 SV=2	sp|P50887|RL22_DROME	31 kDa	13	11	11	9	8	9	9	7	7
CG4972 OS=Drosophila melanogaster GN=CG4972 PE=2 SV=2	tr|Q9VKZ7|Q9VKZ7_DROME	63 kDa	13	13	3	12	11	8	21	9	2
CG9650, isoform H OS=Drosophila melanogaster GN=CG9650 PE=4 SV=2	tr|A8JV11|A8JV11_DROME (+1)	128 kDa	13	11	3	13	9	12	14	15	9
DNA replication licensing factor Mcm5 OS=Drosophila melanogaster GN=Mcm5 PE=1 SV=1	sp|Q9VGW6|MCM5_DROME	82 kDa	13	10	3	4	5	2	1	2	0
Eukaryotic translation initiation factor 3 subunit I OS=Drosophila melanogaster GN=Trip1 PE=1 SV=1	sp|O02195|EIF3I_DROME	36 kDa	13	12	5	12	10	7	5	6	0
LD15904p OS=Drosophila melanogaster GN=pzg PE=2 SV=1	tr|Q9VP57|Q9VP57_DROME	105 kDa	13	17	8	21	18	23	15	12	5
LP21249p OS=Drosophila melanogaster GN=Psa PE=2 SV=1	tr|Q8IRH0|Q8IRH0_DROME (+1)	120 kDa	13	9	3	8	10	5	3	5	2
Rpt4 OS=Drosophila melanogaster GN=Rpt4 PE=2 SV=2	tr|Q9W414|Q9W414_DROME	44 kDa	13	10	1	9	8	5	11	6	2
Ubiquitin carboxyl-terminal hydrolase OS=Drosophila melanogaster GN=CG5384 PE=2 SV=1	tr|Q9VKZ8|Q9VKZ8_DROME	54 kDa	13	15	2	13	10	9	6	7	1
Zipper, isoform C OS=Drosophila melanogaster GN=zip PE=4 SV=1	tr|Q59E58|Q59E58_DROME (+1)	227 kDa	13	7	2	9	6	5	8	4	1
40S ribosomal protein S8 OS=Drosophila melanogaster GN=RpS8 PE=1 SV=1	sp|Q8MLY8|RS8_DROME	24 kDa	12	7	9	8	8	12	9	9	17
Aluminum tubes, isoform G OS=Drosophila melanogaster GN=alt PE=2 SV=1	tr|Q960Y8|Q960Y8_DROME	99 kDa	12	10	3	8	10	6	9	2	2
CaBP1 OS=Drosophila melanogaster GN=CaBP1 PE=2 SV=1	tr|Q9V438|Q9V438_DROME	47 kDa	12	8	6	7	8	6	8	8	4
CAD protein OS=Drosophila melanogaster GN=r PE=1 SV=3	sp|P05990|PYR1_DROME	247 kDa	12	12	1	13	4	3	7	3	0
CG10602, isoform A OS=Drosophila melanogaster GN=CG10602 PE=2 SV=2	tr|Q9VJ39|Q9VJ39_DROME	77 kDa	12	13	6	12	9	10	5	6	2
CG17514, isoform A OS=Drosophila melanogaster GN=CG17514 PE=4 SV=2	tr|Q7PLL6|Q7PLL6_DROME	294 kDa	12	11	0	8	7	8	6	3	0
CG31251 OS=Drosophila melanogaster GN=CG31251 PE=2 SV=2	tr|Q8IN95|Q8IN95_DROME	35 kDa	12	16	10	13	11	12	10	12	11
CG33123 OS=Drosophila melanogaster GN=CG33123 PE=3 SV=2	tr|Q9VQR8|Q9VQR8_DROME	135 kDa	12	14	8	13	8	8	9	8	1
CG7810 OS=Drosophila melanogaster GN=CG7810 PE=2 SV=1	tr|Q9VLP6|Q9VLP6_DROME	42 kDa	12	13	5	5	7	5	7	6	3
CG9281, isoform B OS=Drosophila melanogaster GN=CG9281 PE=2 SV=1	tr|Q9VXR5|Q9VXR5_DROME	70 kDa	12	9	2	7	3	7	7	5	2
Clathrin heavy chain OS=Drosophila melanogaster GN=Chc PE=2 SV=1	sp|P29742|CLH_DROME	191 kDa	12	11	0	12	8	4	7	2	0
DNA replication licensing factor MCM4 OS=Drosophila melanogaster GN=dpa PE=1 SV=2	sp|Q26454|MCM4_DROME	97 kDa	12	13	1	9	7	2	4	0	0
FI01658p OS=Drosophila melanogaster GN=RpL23A PE=2 SV=1	tr|Q9W0A8|Q9W0A8_DROME	29 kDa	12	5	4	8	6	3	10	6	5
Proteasome subunit alpha type-7-1 OS=Drosophila melanogaster GN=Pros28.1 PE=1 SV=2	sp|P22769|PSA71_DROME	28 kDa	12	9	2	8	6	4	7	9	1
Transferrin 1 OS=Drosophila melanogaster GN=Tsf1 PE=2 SV=1	tr|Q9VWV6|Q9VWV6_DROME	72 kDa	12	13	12	9	6	9	2	3	3
Voltage-dependent anion-selective channel OS=Drosophila melanogaster GN=porin PE=1 SV=3	sp|Q94920|VDAC_DROME	31 kDa	12	14	6	16	14	12	13	15	7
26S proteasome regulatory complex subunit p39A OS=Drosophila melanogaster GN=Rpn9 PE=2 SV=1	tr|Q7KMP8|Q7KMP8_DROME	44 kDa	11	10	2	10	10	7	8	8	2
26S proteasome regulatory complex subunit p48A OS=Drosophila melanogaster GN=Rpt3 PE=2 SV=1	tr|Q9V405|Q9V405_DROME	47 kDa	11	6	1	11	8	4	7	4	0
AT27578p OS=Drosophila melanogaster GN=rin PE=1 SV=1	tr|Q9VFT4|Q9VFT4_DROME	75 kDa	11	10	3	11	10	7	9	6	1
Exportin-2 OS=Drosophila melanogaster GN=Cas PE=2 SV=2	sp|Q9XZU1|XPO2_DROME	110 kDa	11	6	5	7	5	8	7	3	1
Fragile X mental retardation syndrome-related protein 1 OS=Drosophila melanogaster GN=Fmr1 PE=1 SV=1	sp|Q9NFU0|FMR1_DROME	76 kDa	11	10	1	8	7	3	6	6	2
Major heat shock 70 kDa protein Ba OS=Drosophila melanogaster GN=Hsp70Ba PE=2 SV=2	sp|Q8INI8|HSP72_DROME (+3)	70 kDa	11	18	7	14	13	12	7	10	5
Probable phosphoserine aminotransferase OS=Drosophila melanogaster GN=CG11899 PE=2 SV=1	sp|Q9VAN0|SERC_DROME	40 kDa	11	9	5	10	7	7	6	4	2
Proteasomal ubiquitin receptor ADRM1 homolog OS=Drosophila melanogaster GN=CG13349 PE=1 SV=1	sp|Q7K2G1|ADRM1_DROME (+1)	42 kDa	11	6	5	10	6	6	7	5	3
26S protease regulatory subunit 8 OS=Drosophila melanogaster GN=Pros45 PE=1 SV=2	sp|O18413|PRS8_DROME	46 kDa	10	8	1	14	5	3	5	5	1
26S proteasome non-ATPase regulatory subunit 6 OS=Drosophila melanogaster GN=Rpn7 PE=2 SV=1	sp|Q9V3G7|PSMD6_DROME	45 kDa	10	6	5	6	5	3	7	6	0
26S proteasome regulatory complex subunit p50 OS=Drosophila melanogaster GN=Tbp-1 PE=2 SV=1	tr|Q9V3V6|Q9V3V6_DROME	48 kDa	10	18	5	16	6	5	11	9	4
26S proteasome regulatory complex subunit p97 OS=Drosophila melanogaster GN=Rpn1 PE=2 SV=2	tr|Q9VW54|Q9VW54_DROME	102 kDa	10	16	6	13	4	7	8	9	3
40S ribosomal protein S17 OS=Drosophila melanogaster GN=RpS17 PE=2 SV=2	sp|P17704|RS17_DROME	15 kDa	10	7	4	8	4	15	6	4	8
CG1837 OS=Drosophila melanogaster GN=prtp PE=2 SV=2	tr|Q9VYV3|Q9VYV3_DROME	47 kDa	10	13	2	9	12	7	9	11	1
CG6287 OS=Drosophila melanogaster GN=CG6287 PE=2 SV=1	tr|Q9VKI8|Q9VKI8_DROME	35 kDa	10	8	2	7	6	10	5	5	5
Chaperone protein DnaJ OS=Drosophila melanogaster GN=Droj2 PE=2 SV=1	tr|Q9VFV9|Q9VFV9_DROME	45 kDa	10	8	2	8	6	7	7	7	1
DNA replication licensing factor Mcm6 OS=Drosophila melanogaster GN=Mcm6 PE=1 SV=1	sp|Q9V461|MCM6_DROME	92 kDa	10	6	0	5	4	1	2	2
DSec61alpha OS=Drosophila melanogaster GN=Sec61alpha PE=2 SV=1	tr|Q8STG9|Q8STG9_DROME	52 kDa	10	4	5	3	8	9	10	7	4
Lamin-B receptor OS=Drosophila melanogaster GN=LBR PE=1 SV=1	sp|Q8MLV1|LBR_DROME	83 kDa	10	8	2	7	6	7	8	4	2
Nascent polypeptide-associated complex subunit alpha OS=Drosophila melanogaster GN=Nacalpha PE=1 SV=2	sp|Q94518|NACA_DROME	23 kDa	10	6	1	7	5	6	7	4	2
Probable 26S proteasome non-ATPase regulatory subunit 3 OS=Drosophila melanogaster GN=Rpn3 PE=2 SV=1	sp|P25161|PSMD3_DROME	56 kDa	10	6	3	9	8	5	7	3	0
Proteasome subunit alpha type-2 OS=Drosophila melanogaster GN=Pros25 PE=1 SV=1	sp|P40301|PSA2_DROME	26 kDa	10	4	2	5	4	6	3	1	2
Putative ATP-dependent RNA helicase me31b OS=Drosophila melanogaster GN=me31B PE=1 SV=3	sp|P23128|DDX6_DROME	52 kDa	10	7	3	7	4	3	7	2	2
Triosephosphate isomerase OS=Drosophila melanogaster GN=Tpi PE=1 SV=3	sp|P29613|TPIS_DROME	27 kDa	10	8	5	9	10	13	7	5	4
Valyl-tRNA synthetase, isoform A OS=Drosophila melanogaster GN=Aats-val PE=2 SV=1	tr|Q0E993|Q0E993_DROME	118 kDa	10	9	5	8	8	6	10	7	3
26S proteasome non-ATPase regulatory subunit 11 OS=Drosophila melanogaster GN=Rpn6 PE=1 SV=1	sp|Q7KLV9|PSD11_DROME	47 kDa	9	9	1	5	6	5	4	4	1
40S ribosomal protein S6 OS=Drosophila melanogaster GN=RpS6 PE=1 SV=1	sp|P29327|RS6_DROME	28 kDa	9	8	6	10	7	12	7	7	11
60S ribosomal protein L5 OS=Drosophila melanogaster GN=RpL5 PE=2 SV=2	sp|Q9W5R8|RL5_DROME	34 kDa	9	15	3	5	15	11	12	10	7
Adenylyl cyclase-associated protein OS=Drosophila melanogaster GN=capt PE=2 SV=2	tr|Q9VPX6|Q9VPX6_DROME	84 kDa	9	7	3	9	5	10	5	3	5
Alcohol dehydrogenase class-3 OS=Drosophila melanogaster GN=Fdh PE=1 SV=3	sp|P46415|ADHX_DROME	40 kDa	9	12	7	9	8	10	4	4	2
C-terminal binding protein, isoform B OS=Drosophila melanogaster GN=CtBP PE=3 SV=1	tr|A4V2S3|A4V2S3_DROME	42 kDa	9	8	3	8	7	5	7	4	1
CG1753, isoform A OS=Drosophila melanogaster GN=Cbs PE=1 SV=1	tr|Q9VRD9|Q9VRD9_DROME	57 kDa	9	5	8	4	4	5	5	3	0
CG33138 OS=Drosophila melanogaster GN=CG33138 PE=4 SV=1	tr|A1Z992|A1Z992_DROME	79 kDa	9	5	1	6	2	2	2	0	0
CG3590 OS=Drosophila melanogaster GN=CG3590-RA PE=2 SV=1	tr|Q9VEP6|Q9VEP6_DROME	54 kDa	9	8	1	6	7	2	5	5	1
CG42351, isoform E OS=Drosophila melanogaster GN=CG42351 PE=4 SV=1	tr|B7YZK4|B7YZK4_DROME	49 kDa	9	8	5	6	6	4	4	7	3
DNA ligase 1 OS=Drosophila melanogaster GN=DNA-ligI PE=1 SV=2	sp|Q9W1H4|DNLI1_DROME	85 kDa	9	9	1	5	0	0	0	0	0
Eukaryotic translation initiation factor 3 subunit K OS=Drosophila melanogaster GN=CG10306 PE=2 SV=1	sp|Q9W2D9|EIF3K_DROME	26 kDa	9	8	4	5	6	4	7	2	2
Eukaryotic translation initiation factor 3 subunit L OS=Drosophila melanogaster GN=CG5642 PE=2 SV=1	sp|Q9VTU4|EIF3L_DROME	63 kDa	9	7	1	11	5	5	4	3	2
GH11341p OS=Drosophila melanogaster GN=Rpn5 PE=2 SV=1	tr|Q9V3Z4|Q9V3Z4_DROME	58 kDa	9	7	0	7	4	2	5	4	1
Heat shock protein 68 OS=Drosophila melanogaster GN=Hsp68 PE=1 SV=1	sp|O97125|HSP68_DROME	70 kDa	9	14	4	13	10	15	7		5
Histone H2A OS=Drosophila melanogaster GN=His2A:CG33856 PE=3 SV=1	tr|Q4AB57|Q4AB57_DROME	13 kDa	9	4	6	5	5	7	6	4	5
Hsc70-interacting protein 1 OS=Drosophila melanogaster GN=HIP PE=1 SV=2	sp|C4NYP8|F10A1_DROME (+2)	41 kDa	9	9	2	7	6	12	7	5	3
Lysyl-tRNA synthetase OS=Drosophila melanogaster GN=Aats-lys PE=2 SV=2	tr|Q9W327|Q9W327_DROME	69 kDa	9	4	3	6	2	6	3	1	1
Malate dehydrogenase OS=Drosophila melanogaster GN=Mdh1 PE=2 SV=2	tr|Q9VKX2|Q9VKX2_DROME	36 kDa	9	8	2	7	6	7	4	4	4
Peptidyl-prolyl cis-trans isomerase OS=Drosophila melanogaster GN=CG2852 PE=2 SV=1	tr|Q9W227|Q9W227_DROME	22 kDa	9	9	6	11	10	11	7	8	5
Profilin OS=Drosophila melanogaster GN=chic PE=1 SV=1	sp|P25843|PROF_DROME	14 kDa	9	9	5	8	7	5	8	6	1
Proteasome subunit beta type-1 OS=Drosophila melanogaster GN=Pros26 PE=2 SV=2	sp|P40304|PSB1_DROME	26 kDa	9	5	3	8	5	3	6	7	3
Protein clueless OS=Drosophila melanogaster GN=clu PE=1 SV=1	sp|A1ZAB5|CLU_DROME	161 kDa	9	7	1	7	6	7	8	4	1
14-3-3 protein zeta OS=Drosophila melanogaster GN=14-3-3zeta PE=1 SV=1	sp|P29310|1433Z_DROME	28 kDa	8	10	3	8	9	9	7	5	4
26S protease regulatory subunit 4 OS=Drosophila melanogaster GN=Pros26.4 PE=2 SV=2	sp|P48601|PRS4_DROME	49 kDa	8	6	2	5	4	2	6	4	2
26S proteasome non-ATPase regulatory subunit 7 OS=Drosophila melanogaster GN=Mov34 PE=1 SV=6	sp|P26270|PSD7_DROME	38 kDa	8	3	0	2	5	2	4	1	1
26S proteasome regulatory complex subunit p48B OS=Drosophila melanogaster GN=Rpt1 PE=2 SV=1	tr|Q7KMQ0|Q7KMQ0_DROME	49 kDa	8	7	6	8	5	3	7	5	2
40S ribosomal protein S16 OS=Drosophila melanogaster GN=RpS16 PE=2 SV=1	sp|Q9W237|RS16_DROME	17 kDa	8	7	8	4	7	8	7	7	7
40S ribosomal protein S23 OS=Drosophila melanogaster GN=RpS23 PE=2 SV=1	sp|Q8T3U2|RS23_DROME	16 kDa	8	8	5	4	4	7	3	4	4
40S ribosomal protein S24 OS=Drosophila melanogaster GN=RpS24 PE=2 SV=1	tr|Q9W229|Q9W229_DROME	15 kDa	8	5	5	7	5	3	3	4	1
6-pyruvoyl tetrahydrobiopterin synthase OS=Drosophila melanogaster GN=pr PE=1 SV=1	sp|P48611|PTPS_DROME	19 kDa	8	7	1	4	8	3	10	7	5
60S ribosomal protein L17 OS=Drosophila melanogaster GN=RpL17 PE=1 SV=1	sp|Q9W3W8|RL17_DROME	22 kDa	8	4	3	1	4	4	2	2	3
60S ribosomal protein L18 OS=Drosophila melanogaster GN=RpL18 PE=1 SV=1	sp|Q9VS34|RL18_DROME	22 kDa	8	8	2	6	7	8	6	6	1
60S ribosomal protein L7 OS=Drosophila melanogaster GN=RpL7 PE=2 SV=2	sp|P32100|RL7_DROME	30 kDa	8	4	3	4	5	6	4	6	4
60S ribosomal protein L9 OS=Drosophila melanogaster GN=RpL9 PE=1 SV=2	sp|P50882|RL9_DROME	21 kDa	8	8	5	8	7	10	5	7	3
Arginine methyltransferase 1 OS=Drosophila melanogaster GN=Art1 PE=2 SV=1	tr|Q9VGW7|Q9VGW7_DROME	43 kDa	8	4	3	7	6	2	4	5	1
ATP-dependent RNA helicase WM6 OS=Drosophila melanogaster GN=Hel25E PE=1 SV=1	sp|Q27268|DX39B_DROME	49 kDa	8	8	2	11	9	14	6	4	2
Burgundy OS=Drosophila melanogaster GN=bur PE=2 SV=3	tr|Q9VIE7|Q9VIE7_DROME	77 kDa	8	8	2	6	5	3	3	1	0
CG11980, isoform B OS=Drosophila melanogaster GN=CG11980 PE=2 SV=1	tr|Q8INP8|Q8INP8_DROME	41 kDa	8	8	4	5	6	4	2	2	0
CG30122, isoform B OS=Drosophila melanogaster GN=CG30122 PE=4 SV=1	tr|A1ZBB4|A1ZBB4_DROME (+2)	140 kDa	8	6	0	9	10	5	3	0	0
CG32473, isoform C OS=Drosophila melanogaster GN=CG32473-RC PE=2 SV=1	tr|Q8INH6|Q8INH6_DROME	116 kDa	8	6	2	7	5	6	3	3	0
CG3678 OS=Drosophila melanogaster GN=CG17556-RA PE=2 SV=2	tr|Q9VEQ2|Q9VEQ2_DROME	33 kDa	8	5	1	8	4	3	4	3	1
DNA replication licensing factor Mcm3 OS=Drosophila melanogaster GN=Mcm3 PE=1 SV=1	sp|Q9XYU1|MCM3_DROME	91 kDa	8	11	3	5	2	3	1	2	0
Eukaryotic peptide chain release factor subunit 1 OS=Drosophila melanogaster GN=eRF1 PE=1 SV=2	sp|Q9VPH7|ERF1_DROME	49 kDa	8	10	4	10	3	7	2	2	1
Eukaryotic translation initiation factor 2 subunit 2 OS=Drosophila melanogaster GN=eIF-2beta PE=1 SV=1	sp|P41375|IF2B_DROME	35 kDa	8	3	0	3	3	2	4	1	0
Eukaryotic translation initiation factor 3 subunit M OS=Drosophila melanogaster GN=Tango7 PE=2 SV=1	sp|Q7JVI3|EIF3M_DROME	44 kDa	8	11	5	7	8	11	6	5	4
FI18644p1 OS=Drosophila melanogaster GN=Hmu PE=2 SV=1	tr|Q9VB46|Q9VB46_DROME	63 kDa	8	9	3	6	8	8	6	4	1
FI18749p1 OS=Drosophila melanogaster GN=Aats-gly PE=2 SV=1	tr|Q9VUK8|Q9VUK8_DROME	85 kDa	8	7	3	3	5	7	5	4	3
GDP-fucose protein O-fucosyltransferase 1 OS=Drosophila melanogaster GN=O-fut1 PE=1 SV=1	sp|Q9V6X7|OFUT1_DROME	47 kDa	8	6	1	7	9	2	6	2	0
Glutamate dehydrogenase, mitochondrial OS=Drosophila melanogaster GN=Gdh PE=1 SV=2	sp|P54385|DHE3_DROME	63 kDa	8	13	0	13	11	8	27	23	17
GTP-binding nuclear protein Ran OS=Drosophila melanogaster GN=ran PE=1 SV=1	sp|Q9VZ23|RAN_DROME (+1)	25 kDa	8	7	1	5	7	7	10	8	5
Heterogeneous nuclear ribonucleoprotein 27C OS=Drosophila melanogaster GN=Hrb27C PE=1 SV=2	sp|P48809|RB27C_DROME (+1)	45 kDa	8	13	2	11	9	12	7	8	0
Hsp70/Hsp90 organizing protein homolog OS=Drosophila melanogaster GN=Hop PE=2 SV=1	tr|Q9VPN5|Q9VPN5_DROME	56 kDa	8	7	2	5	5	6	6	5	2
Inorganic pyrophosphatase OS=Drosophila melanogaster GN=Nurf-38 PE=1 SV=3	sp|O77460|IPYR_DROME	38 kDa	8	9	8	5	10	3	12	6	4
Lethal (2) 44DEa, isoform D OS=Drosophila melanogaster GN=Acsl PE=4 SV=1	tr|A1Z7H2|A1Z7H2_DROME	81 kDa	8	7	3	6	6	7	7	5	1
LP08082p OS=Drosophila melanogaster GN=Ranbp9 PE=2 SV=1	tr|Q9VGP4|Q9VGP4_DROME	114 kDa	8	12	2	11	7	6	4	3	2
Microsomal triacylglycerol transfer protein OS=Drosophila melanogaster GN=Mtp PE=2 SV=2	tr|Q9VIH3|Q9VIH3_DROME	99 kDa	8	4	0	7	6	5	5	4	1
NADPH--cytochrome P450 reductase OS=Drosophila melanogaster GN=Cpr PE=2 SV=2	sp|Q27597|NCPR_DROME	76 kDa	8	7	1	10	6	2	4	3	0
Pixie, isoform A OS=Drosophila melanogaster GN=pix PE=2 SV=1	tr|Q9VSS1|Q9VSS1_DROME	69 kDa	8	8	2	6	6	5	4	4	0
Proteasome subunit alpha type-6 OS=Drosophila melanogaster GN=Prosalpha1 PE=2 SV=2	sp|Q9XZJ4|PSA6_DROME (+1)	27 kDa	8	6	3	6	9	5	5	3	5
Protein extra bases OS=Drosophila melanogaster GN=exba PE=1 SV=1	sp|Q9VNE2|EXBA_DROME	49 kDa	8	7	1	3	7	5	3	4	0
RE28824p OS=Drosophila melanogaster GN=RpL12 PE=2 SV=1	tr|Q9W1B9|Q9W1B9_DROME	18 kDa	8	7	7	6	6	11	7	6	6
Serine-arginine protein 55 OS=Drosophila melanogaster GN=B52 PE=1 SV=4	sp|P26686|SRR55_DROME	43 kDa	8	7	6	10	6	8	3	7	4
Ubiquitin carboxyl-terminal hydrolase 7 OS=Drosophila melanogaster GN=Usp7 PE=1 SV=1	sp|Q9VYQ8|UBP7_DROME	130 kDa	8	8	1	9	4	2	3	3	0
Ubiquitin carboxyl-terminal hydrolase OS=Drosophila melanogaster GN=CG12082 PE=2 SV=1	tr|Q9VZU7|Q9VZU7_DROME	92 kDa	8	13	2	12	7	3	4	6	1
26S proteasome non-ATPase regulatory subunit 4 OS=Drosophila melanogaster GN=Pros54 PE=1 SV=2	sp|P55035|PSMD4_DROME	43 kDa	7	9	3	8	9	6	7	4	2
26S proteasome regulatory complex subunit p30 OS=Drosophila melanogaster GN=Rpn12 PE=2 SV=1	tr|Q9V436|Q9V436_DROME	30 kDa	7	4	4	6	5	4	4	4	4
60S acidic ribosomal protein P2 OS=Drosophila melanogaster GN=RpLP2 PE=1 SV=1	sp|P05389|RLA2_DROME	12 kDa	7	6		3	3	4	6	3	1
60S ribosomal protein L11 OS=Drosophila melanogaster GN=RpL11 PE=1 SV=2	sp|P46222|RL11_DROME	21 kDa	7	7	2	3	7	10	7	3	5
60S ribosomal protein L19 OS=Drosophila melanogaster GN=RpL19 PE=1 SV=2	sp|P36241|RL19_DROME	24 kDa	7	6	2	7	5	2	5	5	4
Actin-interacting protein 1 OS=Drosophila melanogaster GN=flr PE=2 SV=1	sp|Q9VU68|WDR1_DROME	67 kDa	7	4	2	6	7	5	4	2	2
AT01533p OS=Drosophila melanogaster GN=CG6089 PE=2 SV=2	tr|Q9VKM7|Q9VKM7_DROME	76 kDa	7	5	5	8	5	6	9	5	2
AT19513p OS=Drosophila melanogaster GN=Fer2LCH PE=2 SV=1	tr|Q9VA83|Q9VA83_DROME	25 kDa	7	10	2	5	5	6	8	5	4
AUBERGINE OS=Drosophila melanogaster GN=aub PE=1 SV=1	tr|O76922|O76922_DROME	99 kDa	7	6	0	5	2	2	0	1	1
Bifunctional glutamate/proline--tRNA ligase OS=Drosophila melanogaster GN=Aats-glupro PE=1 SV=2	sp|P28668|SYEP_DROME	189 kDa	7	10	3	7	6	4	5	7	1
CG31075 OS=Drosophila melanogaster GN=CG31075 PE=2 SV=2	tr|Q9VB96|Q9VB96_DROME	53 kDa	7	5	1	4	2	5	1	0
CG5366 OS=Drosophila melanogaster GN=Cand1 PE=2 SV=1	tr|Q9VKY2|Q9VKY2_DROME	139 kDa	7	7	1	5	2	1	2	1	1
CG7830 OS=Drosophila melanogaster GN=CG7830 PE=2 SV=1	tr|Q8SY53|Q8SY53_DROME	37 kDa	7	6	1	6	8	5	2	5	1
DNA-binding protein modulo OS=Drosophila melanogaster GN=mod PE=1 SV=2	sp|P13469|MODU_DROME	60 kDa	7	12	6	10	4	8	0	0	0
Ef1alpha-like factor OS=Drosophila melanogaster GN=Elf PE=2 SV=1	tr|Q9VK85|Q9VK85_DROME	66 kDa	7	9	1	4	6	6	4	5	4
Eukaryotic translation initiation factor 2 subunit 3 OS=Drosophila melanogaster GN=Su(var)3-9 PE=2 SV=1	sp|Q24208|IF2G_DROME	51 kDa	7	8	5	13	8	7	10	10	4
Eukaryotic translation initiation factor 3 subunit G-1 OS=Drosophila melanogaster GN=eIF3-S4-1 PE=1 SV=1	sp|Q9W4X7|EI3G1_DROME	30 kDa	7	9	1	3	3	3	4	5	1
FACT complex subunit spt16 OS=Drosophila melanogaster GN=dre4 PE=1 SV=2	sp|Q8IRG6|SPT16_DROME	124 kDa	7	9	3	4	3	0	0	0	0
Ferritin 1 heavy chain homologue, isoform A OS=Drosophila melanogaster GN=Fer1HCH PE=2 SV=1	tr|Q7KRU8|Q7KRU8_DROME	23 kDa	7	9	2	4	3	2	4	8	2
FI17817p1 OS=Drosophila melanogaster GN=Tango5 PE=2 SV=1	tr|Q9W2S1|Q9W2S1_DROME	58 kDa	7	5	0	4	4	3	3	2	0
Heat shock protein 23 OS=Drosophila melanogaster GN=Hsp23 PE=2 SV=2	sp|P02516|HSP23_DROME	21 kDa	7	7	5	8	7	6	0	0	0
Histone H2B OS=Drosophila melanogaster GN=His2B PE=1 SV=2	sp|P02283|H2B_DROME	14 kDa	7	7	11	7	8	8	7	10	9
Nuclear protein localization protein 4 homolog OS=Drosophila melanogaster GN=CG4673 PE=1 SV=3	sp|Q9VBP9|NPL4_DROME	73 kDa	7	7	1	3	3	2	2	2	0
Oligosaccharyl transferase 3 OS=Drosophila melanogaster GN=OstStt3 PE=2 SV=1	tr|Q9XZ53|Q9XZ53_DROME	88 kDa	7	5	4	5	4	5	2	2	7
Otefin OS=Drosophila melanogaster GN=Ote PE=1 SV=2	sp|P20240|OTE_DROME	47 kDa	7	6	3	7	5	4	7	5	0
Phosphoglucomutase OS=Drosophila melanogaster GN=Pgm PE=1 SV=1	sp|Q9VUY9|PGM_DROME	61 kDa	7	4	2	5	2	3	3	2	0
Probable transaldolase OS=Drosophila melanogaster GN=Tal PE=2 SV=2	sp|Q9W1G0|TALDO_DROME	37 kDa	7	6	1	4	4	2	3	2	0
Proliferating cell nuclear antigen OS=Drosophila melanogaster GN=mus209 PE=1 SV=2	sp|P17917|PCNA_DROME	29 kDa	7	6	2	6	3	1	3	2	1
Proteasome subunit alpha type-1 OS=Drosophila melanogaster GN=Pros35 PE=1 SV=1	sp|P12881|PSA1_DROME	31 kDa	7	7	0	6	5	10	11	8	3
Proteasome subunit alpha type-4 OS=Drosophila melanogaster GN=Pros29 PE=1 SV=2	sp|P18053|PSA4_DROME	29 kDa	7	10	3	4	6	6	5	4	3
Proteasome subunit beta type OS=Drosophila melanogaster GN=Prosbeta2 PE=2 SV=1	tr|Q9VUJ1|Q9VUJ1_DROME	30 kDa	7	3	3	3	4	4	3	4	0
RE08270p OS=Drosophila melanogaster GN=RpS15 PE=2 SV=1	tr|Q7JZW2|Q7JZW2_DROME	17 kDa	7	5	2	8	10	4	10	4	2
RE08669p OS=Drosophila melanogaster GN=RpL6 PE=2 SV=1	tr|Q9V9W3|Q9V9W3_DROME	30 kDa	7	5	1	5	4	4	5	4	2
RuvB-like helicase 1 OS=Drosophila melanogaster GN=pont PE=1 SV=1	sp|Q9VH07|RUVB1_DROME	50 kDa	7	8	2	3	4	0	3	3	0
Semaphorin-2A OS=Drosophila melanogaster GN=Sema-2a PE=1 SV=2	sp|Q24323|SEM2A_DROME	83 kDa	7	6	2	10	4	6	7	6	2
Serine/threonine-protein kinase polo OS=Drosophila melanogaster GN=polo PE=1 SV=2	sp|P52304|POLO_DROME	67 kDa	7	7	2	7	3	3	3	1	1
Smallminded protein OS=Drosophila melanogaster GN=smid PE=2 SV=1	tr|P91638|P91638_DROME (+1)	104 kDa	7	10	1	5	4	0	1	0	0
Ubiquitin-40S ribosomal protein S27a OS=Drosophila melanogaster GN=RpS27A PE=1 SV=2	sp|P15357|RS27A_DROME	18 kDa	7	10	4	10	8	9	5	7	5
Uridine 5'-monophosphate synthase OS=Drosophila melanogaster GN=r-l PE=2 SV=2	sp|Q01637|UMPS_DROME	53 kDa	7	8	2	7	7	4	2	4	1
205 kDa microtubule-associated protein OS=Drosophila melanogaster GN=Map205 PE=1 SV=2	sp|P23226|MA205_DROME	127 kDa	6	5	0	3	3	2	2	1
26S proteasome regulatory complex subunit p37A OS=Drosophila melanogaster GN=Uch-L3 PE=2 SV=1	tr|Q9XZ61|Q9XZ61_DROME	38 kDa	6	9	1	7	4	3	4	2	1
40S ribosomal protein S10b OS=Drosophila melanogaster GN=RpS10b PE=1 SV=2	sp|Q9VWG3|RS10B_DROME	18 kDa	6	8	4	5	5	7	5	4	4
40S ribosomal protein S15Aa OS=Drosophila melanogaster GN=RpS15Aa PE=2 SV=2	sp|P48149|RS15A_DROME (+1)	15 kDa	6	7	6	4	6	14	4	6	8
60S acidic ribosomal protein P1 OS=Drosophila melanogaster GN=RpLP1 PE=1 SV=2	sp|P08570|RLA1_DROME	12 kDa	6	3	3	3	3	5	3	3	3
60S ribosomal protein L14 OS=Drosophila melanogaster GN=RpL14 PE=2 SV=1	sp|P55841|RL14_DROME	19 kDa	6	3	3	4	3	10	5	3	5
Aminopeptidase P OS=Drosophila melanogaster GN=ApepP PE=2 SV=1	tr|Q9VJG0|Q9VJG0_DROME	69 kDa	6	7	3	4	4	5	5	1	1
AT08049p OS=Drosophila melanogaster GN=CG1440-RC PE=2 SV=1	tr|A8JV22|A8JV22_DROME	58 kDa	6	4	2	6	3	7	3	2	1
Calnexin 99A, isoform A OS=Drosophila melanogaster GN=Cnx99A PE=2 SV=2	tr|Q9VAL7|Q9VAL7_DROME	68 kDa	6	4		8	9	6	8	9	4
Calreticulin OS=Drosophila melanogaster GN=Crc PE=1 SV=2	sp|P29413|CALR_DROME	47 kDa	6	6	3	8	10	10	15	8	9
CathD OS=Drosophila melanogaster GN=cathD PE=2 SV=1	tr|Q7K485|Q7K485_DROME	42 kDa	6	5	1	4	4	3	3	4	1
CG10077, isoform A OS=Drosophila melanogaster GN=CG10077 PE=2 SV=1	tr|Q8MZI3|Q8MZI3_DROME	88 kDa	6	6	2	7	7	6
CG11107 OS=Drosophila melanogaster GN=CG11107 PE=2 SV=1	tr|Q7K3M5|Q7K3M5_DROME	83 kDa	6	6	1	6	4	3	3	2	0
CG6045 OS=Drosophila melanogaster GN=CG6045-RA PE=2 SV=1	tr|Q9VF51|Q9VF51_DROME	138 kDa	6	6	2	5	4	2	2	0	0
CG9135 protein OS=Drosophila melanogaster GN=CG9135 PE=2 SV=1	tr|Q9VMI5|Q9VMI5_DROME	53 kDa	6	7	5	8	3	5	6	4	1
CG9149 OS=Drosophila melanogaster GN=CG9149 PE=2 SV=2	tr|Q9W0H6|Q9W0H6_DROME	41 kDa	6	3	1	6	2	0	2	1	0
Cofilin/actin-depolymerizing factor homolog OS=Drosophila melanogaster GN=tsr PE=2 SV=1	sp|P45594|CADF_DROME	17 kDa	6	6	4	8	7	6	4	3	4
DNA damage-binding protein 1 OS=Drosophila melanogaster GN=pic PE=1 SV=1	sp|Q9XYZ5|DDB1_DROME	126 kDa	6	9	0	8	4	2	7	2	0
DNA polymerase delta catalytic subunit OS=Drosophila melanogaster GN=DNApol-delta PE=2 SV=2	sp|P54358|DPOD1_DROME	125 kDa	6	2	0	3	2	0	0	0	0
eIF5B OS=Drosophila melanogaster GN=eIF5B PE=2 SV=2	tr|Q9VZP5|Q9VZP5_DROME	127 kDa	6	6	1	6	4	2	4	1	0
Eukaryotic translation initiation factor 3 subunit D-1 OS=Drosophila melanogaster GN=eIF-3p66 PE=1 SV=1	sp|Q9VCK0|EI3D1_DROME	64 kDa	6	5	1	6	5	7	7	5	1
Eukaryotic translation initiation factor 3 subunit F-1 OS=Drosophila melanogaster GN=eIF3-S5-1 PE=2 SV=1	sp|Q9VN50|EI3F1_DROME	31 kDa	6	6	3	8	6	4	8	3	1
Eukaryotic translation initiation factor 3 subunit H OS=Drosophila melanogaster GN=eIF-3p40 PE=2 SV=2	sp|Q9U9Q4|EIF3H_DROME	38 kDa	6	7	3	4	5	4	4	3	1
Failed axon connections OS=Drosophila melanogaster GN=fax PE=2 SV=1	sp|Q95RI5|FAXC_DROME (+1)	47 kDa	6	7	2	8	6	5	5	2	3
FI04456p OS=Drosophila melanogaster GN=Rbp2 PE=2 SV=1	tr|Q7KUX7|Q7KUX7_DROME	38 kDa	6	4	1	4	4	0	2	2	1
FI18627p1 OS=Drosophila melanogaster GN=NTPase PE=2 SV=1	tr|Q9VQI8|Q9VQI8_DROME	51 kDa	6	3	0	3	1	1	5	3	0
Fondue, isoform B OS=Drosophila melanogaster GN=fon PE=2 SV=1	tr|Q9VIX7|Q9VIX7_DROME	58 kDa	6	1	2	2			1
Glycylpeptide N-tetradecanoyltransferase OS=Drosophila melanogaster GN=Nmt PE=2 SV=2	sp|O61613|NMT_DROME	54 kDa	6	3	5	4	5	3	4	5	0
GTP-binding protein 128up OS=Drosophila melanogaster GN=128up PE=2 SV=2	sp|P32234|128UP_DROME	41 kDa	6	6	1	5	4	3	8	5	1
GTP-binding protein CG1354 OS=Drosophila melanogaster GN=CG1354 PE=1 SV=1	sp|Q8SWU7|Y1354_DROME	45 kDa	6	6	0	5	3	4	5	2	1
Hsp90 co-chaperone Cdc37 OS=Drosophila melanogaster GN=Cdc37 PE=1 SV=1	sp|Q24276|CDC37_DROME	45 kDa	6	3	0	2	3		1	2	1
Importin subunit beta OS=Drosophila melanogaster GN=Fs(2)Ket PE=2 SV=2	sp|O18388|IMB_DROME	99 kDa	6	12	2	7	4	2	5	4	1
LD04933p OS=Drosophila melanogaster GN=ste24a PE=2 SV=1	tr|Q7K172|Q7K172_DROME	52 kDa	6	5	1	4	4	2	5	2	2
Methionine aminopeptidase OS=Drosophila melanogaster GN=und PE=2 SV=1	tr|Q9VL89|Q9VL89_DROME	50 kDa	6	5	0	3	3	4	2	0	0
Moesin/ezrin/radixin homolog 1 OS=Drosophila melanogaster GN=Moe PE=1 SV=2	sp|P46150|MOEH_DROME	68 kDa	6	9	2	7	6	2	11	9	1
Probable arginine--tRNA ligase, cytoplasmic OS=Drosophila melanogaster GN=Aats-arg PE=2 SV=1	sp|Q9VXN4|SYRC_DROME	76 kDa	6	7	1	4	6	3	8	5	0
Probable histone-binding protein Caf1 OS=Drosophila melanogaster GN=Caf1 PE=1 SV=1	sp|Q24572|CAF1_DROME	49 kDa	6	5	0	4	6	4	2	3	1
Proteasome subunit beta type OS=Drosophila melanogaster GN=CG17331 PE=2 SV=1	tr|Q9VJJ0|Q9VJJ0_DROME	22 kDa	6	7	1	5	7	1	5	3	0
Protein singed OS=Drosophila melanogaster GN=sn PE=2 SV=1	sp|Q24524|SING_DROME (+1)	57 kDa	6	7	1	9	3	5	5	4	1
Putative glycogen [starch] synthase OS=Drosophila melanogaster GN=CG6904 PE=1 SV=2	sp|Q9VFC8|GYS_DROME	82 kDa	6	3	1	2	3	1	1	1	0
Putative U5 small nuclear ribonucleoprotein 200 kDa helicase OS=Drosophila melanogaster GN=CG5931 PE=2 SV=4	sp|Q9VUV9|U520_DROME	245 kDa	6	5	1	7	6	1	0	0	0
Ran GTPase-activating protein OS=Drosophila melanogaster GN=RanGap PE=1 SV=1	sp|Q9VIW3|RAGP1_DROME	66 kDa	6	1	0	3	1	0	3	1	0
RE14391p OS=Drosophila melanogaster GN=sec63 PE=2 SV=1	tr|Q9VS57|Q9VS57_DROME	86 kDa	6	6	2	4	3	6	7	4	1
RE62581p OS=Drosophila melanogaster GN=RpL21 PE=2 SV=1	tr|Q9V9M7|Q9V9M7_DROME	18 kDa	6	5	2	4	4	7	6	5	2
Replication protein A 70 kDa DNA-binding subunit OS=Drosophila melanogaster GN=RpA-70 PE=1 SV=1	sp|Q24492|RFA1_DROME	67 kDa	6	10	1	4	3	2	4	4	1
Rrp6 OS=Drosophila melanogaster GN=Rrp6 PE=2 SV=3	tr|Q9VFF3|Q9VFF3_DROME	103 kDa	6	6	0	6	3	1	5	3	0
Signal recognition particle receptor subunit alpha homolog OS=Drosophila melanogaster GN=Gtp-bp PE=1 SV=2	sp|Q9U5L1|SRPR_DROME	68 kDa	6	4	0	3	5	0	4	0	0
Transcription elongation factor SPT5 OS=Drosophila melanogaster GN=Spt5 PE=1 SV=1	sp|Q9V460|SPT5H_DROME	119 kDa	6	10	1	6	6	0	2	1	0
Tyrosine-protein kinase Src64B OS=Drosophila melanogaster GN=Src64B PE=1 SV=3	sp|P00528|SRC64_DROME	63 kDa	6	8	3	5	5	1	6	4	2
V-type proton ATPase subunit H OS=Drosophila melanogaster GN=VhaSFD PE=2 SV=2	sp|Q9V3J1|VATH_DROME	54 kDa	6	8	1	6	7	4	7	6	0
Zinc finger protein on ecdysone puffs OS=Drosophila melanogaster GN=Pep PE=1 SV=1	sp|P41073|PEP_DROME	78 kDa	6	4	1	5	4	0	2	1	0
40S ribosomal protein S18 OS=Drosophila melanogaster GN=RpS18 PE=1 SV=1	sp|P41094|RS18_DROME	18 kDa	5	3	2	3	2	6	2	1	2
40S ribosomal protein S20 OS=Drosophila melanogaster GN=RpS20 PE=1 SV=1	sp|P55828|RS20_DROME	13 kDa	5	5	0	2	4	4	4	3	3
6-phosphofructokinase OS=Drosophila melanogaster GN=Pfk PE=2 SV=2	sp|P52034|K6PF_DROME	87 kDa	5	4	2	3	2	2	4	4	1
6-phosphogluconate dehydrogenase, decarboxylating OS=Drosophila melanogaster GN=Pgd PE=2 SV=1	sp|P41572|6PGD_DROME	52 kDa	5	4	1	7	4	1	4	3	3
60S ribosomal protein L23 OS=Drosophila melanogaster GN=RpL23 PE=2 SV=2	sp|P48159|RL23_DROME	15 kDa	5	6	4	5	3	6	3	5	3
60S ribosomal protein L24 OS=Drosophila melanogaster GN=RpL24 PE=1 SV=1	sp|Q9VJY6|RL24_DROME	18 kDa	5	2	0	3	1	1	2	0	3
60S ribosomal protein L27 OS=Drosophila melanogaster GN=RpL27 PE=2 SV=1	tr|Q9VBN5|Q9VBN5_DROME	16 kDa	5	4	2	5	4	4	3	5	1
60S ribosomal protein L32 OS=Drosophila melanogaster GN=RpL32 PE=1 SV=3	sp|P04359|RL32_DROME	16 kDa	5	5	0	4	4	2	2	1	0
60S ribosomal protein L7a OS=Drosophila melanogaster GN=RpL7A PE=2 SV=2	sp|P46223|RL7A_DROME	31 kDa	5	8	3	2	3	3	6	1	1
A kinase anchor protein 200, isoform B OS=Drosophila melanogaster GN=Akap200 PE=2 SV=1	tr|Q8IPF5|Q8IPF5_DROME	38 kDa	5	2	1	3	4	1	5	2
Aldehyde dehydrogenase OS=Drosophila melanogaster GN=Aldh-III PE=2 SV=1	tr|A1Z6Z3|A1Z6Z3_DROME (+1)	56 kDa	5	5	1	3	2	1	2	1
Alpha-actinin, sarcomeric OS=Drosophila melanogaster GN=Actn PE=2 SV=2	sp|P18091|ACTN_DROME	107 kDa	5	4	0	1	3	0	5	2	0
Aspartyl-tRNA synthetase OS=Drosophila melanogaster GN=Aats-asp PE=2 SV=1	tr|Q7K0E6|Q7K0E6_DROME	59 kDa	5	5	2	4	4	2	2	5	0
Bancal, isoform C OS=Drosophila melanogaster GN=bl PE=2 SV=1	tr|A1ZBW0|A1ZBW0_DROME	51 kDa	5	3	0	3	4	1	0	1	0
BcDNA.GH10614 OS=Drosophila melanogaster GN=BcDNA.GH10614 PE=2 SV=1	tr|Q9Y112|Q9Y112_DROME	36 kDa	5	5	2	5	4	2	1	3	0
Casein kinase II subunit alpha OS=Drosophila melanogaster GN=CkIIalpha PE=1 SV=2	sp|P08181|CSK2A_DROME (+1)	40 kDa	5	5	1	7	6	2	5	4	2
CG1091, isoform B OS=Drosophila melanogaster GN=CG1091 PE=2 SV=1	tr|Q9VI58|Q9VI58_DROME	64 kDa	5	4	0	2	2	0	1	1	0
CG11137 OS=Drosophila melanogaster GN=CG11137 PE=2 SV=1	tr|Q9VNQ3|Q9VNQ3_DROME	18 kDa	5	4	0	2	0	1	1	3	0
CG2004 OS=Drosophila melanogaster GN=CG2004 PE=2 SV=1	tr|Q9W3C3|Q9W3C3_DROME	48 kDa	5	4		2	2	0	1	1	1
CG2091 OS=Drosophila melanogaster GN=CG2091 PE=2 SV=1	tr|Q9VNH5|Q9VNH5_DROME	43 kDa	5	2	1	1	1	0	2	1	0
CG4332 OS=Drosophila melanogaster GN=CG4332 PE=2 SV=1	tr|Q9VYG3|Q9VYG3_DROME	64 kDa	5	6	1	4	2	4	5	4	0
CG5112 OS=Drosophila melanogaster GN=CG5112 PE=2 SV=1	tr|Q9VBQ5|Q9VBQ5_DROME	58 kDa	5	3	0	5	1	1	1	1	0
CG6180 OS=Drosophila melanogaster GN=CG6180 PE=2 SV=2	tr|Q9VK60|Q9VK60_DROME	29 kDa	5	4	0	7	2	2	5	3	0
CG6230 OS=Drosophila melanogaster GN=CG6230-RA PE=2 SV=1	tr|Q9VKJ6|Q9VKJ6_DROME	136 kDa	5	3	0	3	2	0	6	3	0
CG7414, isoform B OS=Drosophila melanogaster GN=CG7414 PE=4 SV=1	tr|B7Z098|B7Z098_DROME	77 kDa	5	1	1	6	2	0	1	1	0
CG9436 OS=Drosophila melanogaster GN=CG9436 PE=2 SV=1	tr|Q7JVH6|Q7JVH6_DROME	35 kDa	5	2	0	3	3	2	2	1
Dipeptidase B, isoform A OS=Drosophila melanogaster GN=Dip-B PE=2 SV=2	tr|Q9VFQ9|Q9VFQ9_DROME	56 kDa	5	6	3	8	7	1	6	6	1
Eb1, isoform A OS=Drosophila melanogaster GN=Eb1 PE=2 SV=1	tr|Q7JZD3|Q7JZD3_DROME	33 kDa	5	2	1	5	3	3	3	3	1
Eukaryotic translation initiation factor 2 subunit 1 OS=Drosophila melanogaster GN=eIF-2alpha PE=2 SV=1	sp|P41374|IF2A_DROME	39 kDa	5	7	0	9	6	5	3	5	3
FI06027p OS=Drosophila melanogaster GN=Aats-trp PE=2 SV=1	tr|Q0KI98|Q0KI98_DROME	48 kDa	5	3	1	3	2	1	3	1
FK506-binding protein 59 OS=Drosophila melanogaster GN=FKBP59 PE=1 SV=1	sp|Q9VL78|FKB59_DROME	49 kDa	5	9	4	7	2	3	4	4	0
GH13304p OS=Drosophila melanogaster GN=Pglym78 PE=2 SV=2	tr|Q9VAN7|Q9VAN7_DROME	29 kDa	5	7	3	6	5	10	4	4	2
GH27579p OS=Drosophila melanogaster GN=grsm PE=2 SV=1	tr|Q9V3D8|Q9V3D8_DROME (+1)	60 kDa	5	8	3	8	5	2	5	3	1
Glutathione S transferase E6 OS=Drosophila melanogaster GN=GstE6 PE=3 SV=1	tr|A1ZB71|A1ZB71_DROME	25 kDa	5	3	0	4	4	0	1	3	0
Heterogeneous nuclear ribonucleoprotein A1 OS=Drosophila melanogaster GN=Hrb98DE PE=2 SV=1	sp|P07909|ROA1_DROME (+2)	39 kDa	5	2	1	4	3	0	3	2	1
Histone H4 OS=Drosophila melanogaster GN=His4 PE=1 SV=2	sp|P84040|H4_DROME	11 kDa	5	5	9	4	5	5	5	5	1
Kinesin heavy chain OS=Drosophila melanogaster GN=Khc PE=1 SV=2	sp|P17210|KINH_DROME	110 kDa	5	6	1	6	6	1	4	4	0
LD13601p OS=Drosophila melanogaster GN=UGP PE=2 SV=2	tr|Q9VSW1|Q9VSW1_DROME	59 kDa	5	5	1	7	4	3	2	2	2
LD22577p OS=Drosophila melanogaster GN=Uba2 PE=2 SV=1	tr|Q7KUA4|Q7KUA4_DROME	78 kDa	5	5	0	4	3	5	4	2	1
Microtubule-associated protein Jupiter OS=Drosophila melanogaster GN=Jupiter PE=1 SV=2	sp|Q9I7K0|JUPIT_DROME	22 kDa	5	2	0	4	3	4	2	4	0
MIP09035p OS=Drosophila melanogaster GN=poly PE=2 SV=1	tr|Q9VFW4|Q9VFW4_DROME	28 kDa	5	2	2		0	0	0	0	0
Nuclear cap-binding protein subunit 1 OS=Drosophila melanogaster GN=Cbp80 PE=1 SV=1	sp|Q7K4N3|NCBP1_DROME (+1)	93 kDa	5	4	0	3	2	1	0		0
Probable E3 ubiquitin-protein ligase HERC2 OS=Drosophila melanogaster GN=HERC2 PE=1 SV=3	sp|Q9VR91|HERC2_DROME	530 kDa	5	5	0	4	0	0	0	1	0
Probable phenylalanine--tRNA ligase beta subunit OS=Drosophila melanogaster GN=CG5706 PE=2 SV=1	sp|Q9VCA5|SYFB_DROME	66 kDa	5	6	2	3	4	2	3	2
Proteasome subunit alpha type-3 OS=Drosophila melanogaster GN=Prosalpha7 PE=1 SV=1	sp|Q9V5C6|PSA3_DROME	28 kDa	5	4	1	4	3	10	5	3	4
Proteasome subunit alpha type-5 OS=Drosophila melanogaster GN=Prosalpha5 PE=2 SV=2	sp|Q95083|PSA5_DROME	27 kDa	5	4	1	6	4	1	5	3	0
Proteasome-associated protein ECM29 homolog OS=Drosophila melanogaster GN=CG8858 PE=1 SV=1	sp|Q9V677|ECM29_DROME	212 kDa	5	3	0	4	1	2	0	0	0
Protein jagunal OS=Drosophila melanogaster GN=jagn PE=1 SV=1	sp|Q7K1V5|JAGN_DROME (+1)	23 kDa	5	3	2	4	4	2	3	4	1
Protein phosphatase PP2A 55 kDa regulatory subunit OS=Drosophila melanogaster GN=tws PE=2 SV=1	sp|P36872|2ABA_DROME	57 kDa	5	4	2	7	4	1	6	2	1
Ribonucleoside-diphosphate reductase subunit M2 OS=Drosophila melanogaster GN=RnrS PE=1 SV=2	sp|P48592|RIR2_DROME	45 kDa	5	4	1	5	2	2	2	2	0
Ribose-phosphate pyrophosphokinase OS=Drosophila melanogaster GN=CG6767 PE=2 SV=3	tr|Q9VT33|Q9VT33_DROME	43 kDa	5	5	1	4	4	4	3	4	1
SD06613p OS=Drosophila melanogaster GN=vig2 PE=2 SV=1	tr|Q960D3|Q960D3_DROME	45 kDa	5	3	0	6	3	4	5	1	1
26-29kD-proteinase OS=Drosophila melanogaster GN=26-29-p PE=2 SV=1	tr|Q9V3U6|Q9V3U6_DROME	62 kDa	4	6	2	4	4	4	6	3	6
39 kDa FK506-binding nuclear protein OS=Drosophila melanogaster GN=FK506-bp1 PE=1 SV=2	sp|P54397|FKB39_DROME	39 kDa	4	5	5	3	1	2	2	1
40S ribosomal protein S11 OS=Drosophila melanogaster GN=RpS11 PE=1 SV=1	sp|Q0E9B6|RS11_DROME	18 kDa	4	2	2	2	2	2	3	3	0
40S ribosomal protein S19a OS=Drosophila melanogaster GN=RpS19a PE=2 SV=3	sp|P39018|RS19A_DROME (+1)	17 kDa	4	4	3	4	3	3	2	4	4
40S ribosomal protein S25 OS=Drosophila melanogaster GN=RpS25 PE=1 SV=3	sp|P48588|RS25_DROME	13 kDa	4	6	0	4	3	1	7	2	0
60S ribosomal protein L15 OS=Drosophila melanogaster GN=RpL15 PE=2 SV=1	sp|O17445|RL15_DROME (+1)	24 kDa	4	4	4	3	4	7	2	3	4
60S ribosomal protein L18a OS=Drosophila melanogaster GN=RpL18A PE=1 SV=1	sp|P41093|RL18A_DROME	21 kDa	4	2	1	4	2	7	6	3	4
60S ribosomal protein L8 OS=Drosophila melanogaster GN=RpL8 PE=2 SV=1	sp|Q9V3G1|RL8_DROME	28 kDa	4	5	2	2	4	2	4	2	3
Adenylosuccinate synthetase OS=Drosophila melanogaster GN=CG17273 PE=2 SV=1	sp|Q9Y0Y2|PURA_DROME	49 kDa	4	3		2	1	0	2	2	0
ADP-ribosylation factor 1 OS=Drosophila melanogaster GN=Arf79F PE=2 SV=2	sp|P61209|ARF1_DROME	21 kDa	4	11	1	7	7	12	11	6	4
Alpha-coatomer protein, isoform A OS=Drosophila melanogaster GN=alphaCop PE=2 SV=1	tr|Q9W0B8|Q9W0B8_DROME	139 kDa	4	2	0	3	1	0	2	1	0
Anamorsin homolog OS=Drosophila melanogaster GN=l(2)35Bg PE=2 SV=1	sp|Q9V3Y2|DRE2_DROME	27 kDa	4	2	0	2	2	0	1	1
Apoptosis inhibitor 5 homolog OS=Drosophila melanogaster GN=Aac11 PE=1 SV=1	sp|Q9V431|API5_DROME	60 kDa	4	5	1	4	6	0	0	0
Arc2 OS=Drosophila melanogaster GN=Arc2 PE=2 SV=1	tr|Q7JV70|Q7JV70_DROME	23 kDa	4	0	0	0	2			0
Arginine kinase OS=Drosophila melanogaster GN=Argk PE=2 SV=2	sp|P48610|KARG_DROME (+2)	40 kDa	4	8	2	5	6	4	6	4	0
Asparaginyl-tRNA synthetase OS=Drosophila melanogaster GN=Aats-asn PE=2 SV=1	tr|Q9V434|Q9V434_DROME	64 kDa	4	2	2	2	1	4	3	1	1
BcDNA.LD12153 OS=Drosophila melanogaster GN=Dph5 PE=2 SV=2	tr|Q8IN02|Q8IN02_DROME	32 kDa	4	5	0	4	3	1	0	1	0
BcDNA.LD34343 OS=Drosophila melanogaster GN=wdb PE=2 SV=2	tr|Q9VB23|Q9VB23_DROME	60 kDa	4	2		3	1	1	2	1
Beta adaptin OS=Drosophila melanogaster GN=Bap PE=2 SV=1	tr|Q24253|Q24253_DROME	101 kDa	4	2	0	1	1	1	2	1	0
Calponin-like protein Chd64 OS=Drosophila melanogaster GN=Chd64 PE=2 SV=2	tr|Q9VZI1|Q9VZI1_DROME	21 kDa	4	5	0	2	3	0	3	2	0
Catalase OS=Drosophila melanogaster GN=Cat PE=1 SV=2	sp|P17336|CATA_DROME	57 kDa	4	3	1	5	7	3	8	4	2
CG10565 OS=Drosophila melanogaster GN=CG10565 PE=2 SV=1	tr|Q9VP77|Q9VP77_DROME	74 kDa	4	4	0	5	3	2	3	3	1
CG10777 OS=Drosophila melanogaster GN=CG10777 PE=2 SV=1	tr|Q9W3M7|Q9W3M7_DROME	100 kDa	4	5	2	2	3	3	0	1	0
CG10984, isoform A OS=Drosophila melanogaster GN=CG10984 PE=2 SV=1	tr|Q8T0E7|Q8T0E7_DROME	71 kDa	4	5	0	2	1	4	3	3	2
CG10990, isoform A OS=Drosophila melanogaster GN=Pdcd4 PE=2 SV=2	tr|Q9VY91|Q9VY91_DROME	56 kDa	4	3		4	2	1	3	1	1
CG13900, isoform A OS=Drosophila melanogaster GN=CG13900-RA PE=2 SV=2	tr|Q9W0M7|Q9W0M7_DROME	137 kDa	4	2	0	3	4	1	1	1	0
CG1416, isoform A OS=Drosophila melanogaster GN=CG1416 PE=2 SV=2	tr|Q9V9Q4|Q9V9Q4_DROME	40 kDa	4	4	2	6	3	4	3	2	1
CG1597 OS=Drosophila melanogaster GN=CG1597 PE=2 SV=4	tr|Q9VZ04|Q9VZ04_DROME	96 kDa	4	7	2	2	3	2	4	1	0
CG2051 OS=Drosophila melanogaster GN=CG2051 PE=2 SV=1	tr|Q0KIB3|Q0KIB3_DROME	48 kDa	4	4	0	5	4	3	3	3	2
CG3033 OS=Drosophila melanogaster GN=CG3033 PE=2 SV=1	tr|Q9W464|Q9W464_DROME	75 kDa	4	2	0	5	1	2	2	1
CG31739 OS=Drosophila melanogaster GN=mdy PE=2 SV=3	tr|Q9VJH2|Q9VJH2_DROME	122 kDa	4	0	0	2	1	0	0	0	0
CG3609 OS=Drosophila melanogaster GN=CG3609 PE=2 SV=1	tr|Q9VQB4|Q9VQB4_DROME	37 kDa	4	7	0	3	4	2	4	2	1
CG40045 OS=Drosophila melanogaster GN=CG40045 PE=2 SV=1	tr|Q8SYG3|Q8SYG3_DROME	19 kDa	4	5	1	2	2	6	2	1	1
CG4408 OS=Drosophila melanogaster GN=CG4408 PE=2 SV=2	tr|Q9VCM8|Q9VCM8_DROME	54 kDa	4	9	0	2	2	2	4	2	1
CG5554 OS=Drosophila melanogaster GN=CG5554 PE=2 SV=1	tr|Q9W1I7|Q9W1I7_DROME	36 kDa	4	5	1	3	3	8	3	4	2
CG6199, isoform A OS=Drosophila melanogaster GN=Plod PE=2 SV=1	tr|Q9VTH0|Q9VTH0_DROME	83 kDa	4	4	1	5	6	2	7	3	0
CG6783, isoform B OS=Drosophila melanogaster GN=fabp PE=2 SV=1	tr|Q9VGM2|Q9VGM2_DROME	15 kDa	4	4	1	3	4	4	4	4	4
CG7261 OS=Drosophila melanogaster GN=CG7261 PE=2 SV=1	tr|Q9VQ78|Q9VQ78_DROME	135 kDa	4	1	0	1	1	0	2		0
CG7692 OS=Drosophila melanogaster GN=CG7692 PE=4 SV=2	tr|Q9VVF8|Q9VVF8_DROME	152 kDa	4	3	1	5	2	1	3	3	0
CG9485, isoform B OS=Drosophila melanogaster GN=CG9485 PE=2 SV=3	tr|Q9W2H8|Q9W2H8_DROME	183 kDa	4	3	1	2	1	1	2	3	0
CG9911, isoform A OS=Drosophila melanogaster GN=CG9911 PE=2 SV=1	tr|Q95TL8|Q95TL8_DROME (+1)	47 kDa	4	4	1	2	2	2	3	3	0
Chitinase-like protein Idgf4 OS=Drosophila melanogaster GN=Idgf4 PE=2 SV=1	sp|Q9W303|IDGF4_DROME	49 kDa	4	6	1	6	3	4	4	2	0
Chromodomain-helicase-DNA-binding protein Mi-2 homolog OS=Drosophila melanogaster GN=Mi-2 PE=1 SV=2	sp|O97159|CHDM_DROME (+2)	224 kDa	4	6	2	4	5	2	2	1	0
Coatomer subunit beta' OS=Drosophila melanogaster GN=beta'Cop PE=2 SV=2	sp|O62621|COPB2_DROME	103 kDa	4	6	0	3	2	1	1	2	0
DJ-1 beta OS=Drosophila melanogaster GN=dj-1beta PE=1 SV=2	tr|Q9VA37|Q9VA37_DROME	21 kDa	4	2		1	1		0	2	1
DNA replication-related element factor OS=Drosophila melanogaster GN=Dref PE=2 SV=2	tr|Q94883|Q94883_DROME	81 kDa	4	4	0	3	4	2	2	1	0
Dynamin OS=Drosophila melanogaster GN=shi PE=1 SV=2	sp|P27619|DYN_DROME (+2)	98 kDa	4	5	0	4	1	1	3	0	0
Dynamin related protein 1 OS=Drosophila melanogaster GN=Drp1 PE=2 SV=1	tr|Q9VQE0|Q9VQE0_DROME	83 kDa	4	1	0	2	0	0	0	0	0
Dynein heavy chain, cytoplasmic OS=Drosophila melanogaster GN=Dhc64C PE=2 SV=2	sp|P37276|DYHC_DROME	530 kDa	4	2	0	2	0	0	0	0	0
Eip55E OS=Drosophila melanogaster GN=Eip55E PE=2 SV=1	tr|Q7JXZ2|Q7JXZ2_DROME	43 kDa	4	9	2	8	6	4	3	0	0
Epidermal growth factor receptor pathway substrate clone 15, isoform B OS=Drosophila melanogaster GN=Eps-15 PE=2 SV=1	tr|Q8MMD2|Q8MMD2_DROME	132 kDa	4	9	1	7	6	5	10	6	3
Ergic53, isoform A OS=Drosophila melanogaster GN=ergic53 PE=2 SV=1	tr|Q9V3A8|Q9V3A8_DROME	58 kDa	4	5	1	6	3	3	7	2	2
FI01544p OS=Drosophila melanogaster GN=Rab1 PE=2 SV=1	tr|O18332|O18332_DROME	23 kDa	4	1	1	3	4	3	3	3	0
FI02994p OS=Drosophila melanogaster GN=Sec61beta PE=2 SV=1	tr|Q7JZN0|Q7JZN0_DROME	10 kDa	4	2	0	6	3	2	4	4	1
FI20063p1 OS=Drosophila melanogaster GN=Imp PE=2 SV=1	tr|E1JJM0|E1JJM0_DROME	63 kDa	4	4	1	4	3	3	2	1	0
Glutamate oxaloacetate transaminase 1, isoform A OS=Drosophila melanogaster GN=Got1 PE=2 SV=1	tr|Q7K221|Q7K221_DROME	46 kDa	4	4	2	4	2	3	1	2	0
Glutathione peroxidase OS=Drosophila melanogaster GN=PHGPx PE=2 SV=1	tr|Q8IRD3|Q8IRD3_DROME	26 kDa	4	6	2	6	4	4	3	3	1
Glycerol-3-phosphate dehydrogenase [NAD(+)], cytoplasmic OS=Drosophila melanogaster GN=Gpdh PE=1 SV=3	sp|P13706|GPDA_DROME	40 kDa	4	2	0	3	2	0	2	2	0
GM04682p OS=Drosophila melanogaster GN=twr PE=2 SV=1	tr|O97066|O97066_DROME	21 kDa	4	6	2	6	5	3	3	3	2
Gp210 OS=Drosophila melanogaster GN=gp210 PE=4 SV=1	tr|A1Z6H7|A1Z6H7_DROME	210 kDa	4	5	0	3	0	0	0	0	0
Heterochromatin protein 1 OS=Drosophila melanogaster GN=Su(var)205 PE=1 SV=2	sp|P05205|HP1_DROME	23 kDa	4	5	1	2	3	2	2	1
Inosine-5'-monophosphate dehydrogenase OS=Drosophila melanogaster GN=ras PE=1 SV=1	sp|Q07152|IMDH_DROME (+1)	58 kDa	4	4	1	2	2	2	1	0	1
Inositol-3-phosphate synthase OS=Drosophila melanogaster GN=Inos PE=1 SV=1	sp|O97477|INO1_DROME	62 kDa	4	3	1	2	0	0	1	0
La protein homolog OS=Drosophila melanogaster GN=La PE=1 SV=2	sp|P40796|LA_DROME (+1)	45 kDa	4	4	0	5	4	1	3	0	1
LD07775p OS=Drosophila melanogaster GN=smt3 PE=1 SV=1	tr|O97102|O97102_DROME	10 kDa	4	4	3	2	3	4	2	1	1
Lingerer, isoform E OS=Drosophila melanogaster GN=lig PE=4 SV=1	tr|E1JH02|E1JH02_DROME	135 kDa	4	4	1	2	5	2	6	4	1
Lysine-specific demethylase lid OS=Drosophila melanogaster GN=lid PE=1 SV=1	sp|Q9VMJ7|KDM5_DROME	204 kDa	4	5	0	4	0	0	0	0	0
NAT1, isoform C (Fragment) OS=Drosophila melanogaster GN=NAT1 PE=2 SV=1	tr|Q5KTT4|Q5KTT4_DROME	167 kDa	4	4	0	4	2	2	5	2	0
Phosphomannomutase 45A, isoform A OS=Drosophila melanogaster GN=Pmm45A PE=4 SV=1	tr|A1Z7P1|A1Z7P1_DROME	70 kDa	4	7	0	1	2	3	1	0	0
Probable glutamine--tRNA ligase OS=Drosophila melanogaster GN=Aats-gln PE=1 SV=1	sp|Q9Y105|SYQ_DROME	88 kDa	4	6	0	7	2	4	4	3	2
Probable histone-arginine methyltransferase CARMER OS=Drosophila melanogaster GN=Art4 PE=1 SV=1	sp|Q9VH48|CARM1_DROME	60 kDa	4	5	1	4	2	3	1	0	1
Probable N-acetyltransferase san OS=Drosophila melanogaster GN=san PE=1 SV=1	sp|Q9NHD5|SAN_DROME	21 kDa	4	4	3	4	1	4	1	1	0
Proteasome subunit beta type-3 OS=Drosophila melanogaster GN=Prosbeta3 PE=2 SV=1	sp|Q9XYN7|PSB3_DROME	23 kDa	4	6	2	6	4	7	2	2	2
Proteasome subunit beta type-4 OS=Drosophila melanogaster GN=Prosbeta7 PE=2 SV=1	sp|Q9VNA5|PSB4_DROME	30 kDa	4	7	3	1	2	6	1	2	3
Protein Kr-h2 OS=Drosophila melanogaster GN=Kr-h2 PE=1 SV=1	sp|Q9V447|KRH2_DROME (+1)	31 kDa	4	2	0	4	3	1	2	0
Putative peptidyl-prolyl cis-trans isomerase dodo OS=Drosophila melanogaster GN=dod PE=2 SV=3	sp|P54353|DOD_DROME	18 kDa	4	2	0	2	1		3	0	0
RE25263p OS=Drosophila melanogaster GN=RpL30 PE=2 SV=1	tr|Q9VJ19|Q9VJ19_DROME	12 kDa	4	4	2	4	3	3	3	2	2
Regulator of chromosome condensation OS=Drosophila melanogaster GN=Bj1 PE=1 SV=2	sp|P25171|RCC1_DROME	59 kDa	4	8	3	2	3	3	2	1	1
Replication factor C subunit 3 OS=Drosophila melanogaster GN=RfC3 PE=2 SV=2	tr|Q9VKW3|Q9VKW3_DROME	37 kDa	4	7	0	3	4	1	0	1	0
Rtnl1, isoform H OS=Drosophila melanogaster GN=Rtnl1 PE=4 SV=1	tr|E1JHT6|E1JHT6_DROME	65 kDa	4	7	0	5	2	3	3	3	2
RuvB-like helicase 2 OS=Drosophila melanogaster GN=rept PE=1 SV=1	sp|Q9V3K3|RUVB2_DROME	54 kDa	4	5	1	4	4		2	3	1
Sec23, isoform A OS=Drosophila melanogaster GN=sec23 PE=2 SV=2	tr|Q9VNF8|Q9VNF8_DROME	87 kDa	4	2	1	3	2	2	3	2	0
Selenide, water dikinase OS=Drosophila melanogaster GN=SelD PE=1 SV=1	sp|O18373|SPS1_DROME	43 kDa	4	5	1	4	3	2	3	1	1
Serine hydroxymethyltransferase OS=Drosophila melanogaster GN=CG3011 PE=2 SV=1	tr|Q9W457|Q9W457_DROME	59 kDa	4	10	5	8	7	5	6	6	3
Serine/threonine-protein phosphatase alpha-2 isoform OS=Drosophila melanogaster GN=Pp1-87B PE=1 SV=1	sp|P12982|PP12_DROME	35 kDa	4	2	2	3	2	0	3	1
Serine/threonine-protein phosphatase PP2A OS=Drosophila melanogaster GN=mts PE=2 SV=1	sp|P23696|PP2A_DROME	35 kDa	4	6	3	4	2	3	3	3	2
Sodium/potassium-transporting ATPase subunit alpha OS=Drosophila melanogaster GN=Atpalpha PE=1 SV=3	sp|P13607|ATNA_DROME	116 kDa	4	5	0	5	5	6	5	5	1
Spectrin beta chain OS=Drosophila melanogaster GN=beta-Spec PE=1 SV=2	sp|Q00963|SPTCB_DROME	266 kDa	4	2	0	6	3	0	0	1	0
Spermidine synthase, isoform A OS=Drosophila melanogaster GN=SpdS PE=2 SV=1	tr|Q9VHA1|Q9VHA1_DROME	32 kDa	4	3	0	2	3	1	2	2	0
Splicing factor U2AF 50 kDa subunit OS=Drosophila melanogaster GN=U2af50 PE=2 SV=1	sp|Q24562|U2AF2_DROME	47 kDa	4	3	0	2	2	0	0	1	0
Ubiquitin carboxyl-terminal hydrolase OS=Drosophila melanogaster GN=Uch PE=2 SV=2	sp|P35122|UCHL_DROME	26 kDa	4	5	1	5	2	4	3	3	1
Ubiquitin-conjugating enzyme E2 N OS=Drosophila melanogaster GN=ben PE=2 SV=1	sp|P35128|UBE2N_DROME (+1)	17 kDa	4	3	0	1	1	2	2	1	0
UPF0609 protein CG1218 OS=Drosophila melanogaster GN=CG1218 PE=1 SV=2	sp|Q9VNI3|U609_DROME	51 kDa	4	3	0	2	1	1	1	0	1
12 kDa FK506-binding protein OS=Drosophila melanogaster GN=FK506-bp2 PE=3 SV=2	sp|P48375|FKB12_DROME	12 kDa	3	5	1	4	2	6	2	3	0
26S proteasome non-ATPase regulatory subunit 14 OS=Drosophila melanogaster GN=Rpn11 PE=1 SV=1	sp|Q9V3H2|PSDE_DROME	34 kDa	3	2	0	2	2	2	2	0	1
3-hydroxyacyl-CoA dehydrogenase type-2 OS=Drosophila melanogaster GN=scu PE=1 SV=1	sp|O18404|HCD2_DROME	27 kDa	3	4	1	3	3	0	3	3	2
40S ribosomal protein S27 OS=Drosophila melanogaster GN=RpS27 PE=2 SV=1	tr|Q9VBU9|Q9VBU9_DROME	9 kDa	3	3	4	3	3	2	3	1	0
40S ribosomal protein S9 OS=Drosophila melanogaster GN=RpS9 PE=2 SV=2	sp|P55935|RS9_DROME	23 kDa	3	2	1	1	2	2	2	1	2
60 kDa heat shock protein, mitochondrial OS=Drosophila melanogaster GN=Hsp60 PE=1 SV=3	sp|O02649|CH60_DROME	61 kDa	3	5	0	4	4	1	5	3	1
60S ribosomal protein L10 OS=Drosophila melanogaster GN=RpL10 PE=2 SV=1	sp|O61231|RL10_DROME	26 kDa	3	3	1	3	3	4	2	2	5
60S ribosomal protein L13 OS=Drosophila melanogaster GN=RpL13 PE=2 SV=1	sp|P41126|RL13_DROME	25 kDa	3	1	2	1	3	2	1	2	1
60S ribosomal protein L27a OS=Drosophila melanogaster GN=RpL27A PE=2 SV=2	sp|P41092|RL27A_DROME	17 kDa	3	3	1	1	2	5	2	3	1
60S ribosomal protein L36 OS=Drosophila melanogaster GN=RpL36 PE=3 SV=1	sp|P49630|RL36_DROME	14 kDa	3	4	3	5	4	4	3	3	3
Acidic leucine-rich nuclear phosphoprotein 32 family member A OS=Drosophila melanogaster GN=Anp32a PE=2 SV=1	sp|Q9V895|AN32A_DROME (+2)	29 kDa	3	3	1	3	4	1	0	1	0
Actin-related protein 2 OS=Drosophila melanogaster GN=Arp14D PE=2 SV=2	sp|P45888|ARP2_DROME (+1)	45 kDa	3	1		0	0	0	0		0
Actin-related protein 3 OS=Drosophila melanogaster GN=Arp66B PE=2 SV=3	sp|P32392|ARP3_DROME	47 kDa	3	1	1	0	0	0	0	0	0
Adenylate kinase OS=Drosophila melanogaster GN=Dak1 PE=2 SV=1	tr|Q9VBI2|Q9VBI2_DROME	28 kDa	3	2	0	2	3	1	3	2	1
ADP-ribosylation factor 2 OS=Drosophila melanogaster GN=Arf102F PE=2 SV=2	sp|P40945|ARF2_DROME	21 kDa	3	14	1	9	7	10	11	7	0
ADP,ATP carrier protein OS=Drosophila melanogaster GN=sesB PE=2 SV=4	sp|Q26365|ADT_DROME	34 kDa	3	4	1	10	4	1	8	7	3
Alphabet, isoform A OS=Drosophila melanogaster GN=alph PE=2 SV=1	tr|Q9VAK1|Q9VAK1_DROME	41 kDa	3	4	0	3	2	1	2	1
Aly OS=Drosophila melanogaster GN=Ref1 PE=2 SV=1	tr|Q9V3E7|Q9V3E7_DROME	28 kDa	3	2	0	5	4	0	0	1	1
Arginine methyltransferase 3, isoform B OS=Drosophila melanogaster GN=Art3 PE=2 SV=1	tr|Q8INE8|Q8INE8_DROME (+1)	54 kDa	3	3	0	2	2	1	1		0
AT04676p OS=Drosophila melanogaster GN=CG1640 PE=2 SV=3	tr|Q9VYD9|Q9VYD9_DROME	64 kDa	3	3	0	2	3	1	2	2	1
Atlastin OS=Drosophila melanogaster GN=atl PE=1 SV=1	sp|Q9VC57|ATLAS_DROME	61 kDa	3	4	2	3	3	3	3	2
BcDNA.LD02793 OS=Drosophila melanogaster GN=Prp19 PE=2 SV=1	tr|Q7KLW9|Q7KLW9_DROME	55 kDa	3	5	1	5	5	0	1	0	1
BcDNA.LD08534 OS=Drosophila melanogaster GN=dUTPase PE=1 SV=1	tr|Q9V3I1|Q9V3I1_DROME	20 kDa	3	4	1	2	3	4	5	4	3
BcDNA.LD10457 OS=Drosophila melanogaster GN=SsRbeta PE=2 SV=2	tr|Q9VUZ0|Q9VUZ0_DROME	21 kDa	3	2	3	3	3	3	4	3	5
Beta NAC homolog OS=Drosophila melanogaster GN=bic PE=2 SV=1	tr|Q7KM15|Q7KM15_DROME	18 kDa	3			0	0	0	1	2	0
Brahma associated protein 155 kDa OS=Drosophila melanogaster GN=mor PE=2 SV=3	tr|Q9VF03|Q9VF03_DROME	131 kDa	3	4	0	3	1	0	1	1	0
Caprin homolog OS=Drosophila melanogaster GN=Capr PE=1 SV=1	sp|Q9I7D3|CAPR1_DROME	104 kDa	3	4	1	4	6	1	4	4	1
CG10638, isoform A OS=Drosophila melanogaster GN=CG10638 PE=2 SV=1	tr|Q9VTY2|Q9VTY2_DROME	36 kDa	3	7	1	4	5	5	3	3	0
CG10882 OS=Drosophila melanogaster GN=gho PE=2 SV=2	tr|Q9VQ94|Q9VQ94_DROME	129 kDa	3	2	0	2	2	3	2	1	1
CG11164 OS=Drosophila melanogaster GN=CG11164 PE=2 SV=1	tr|Q9VYA4|Q9VYA4_DROME	38 kDa	3	0	0	0		0	0		0
CG12171 OS=Drosophila melanogaster GN=CG12171 PE=2 SV=1	tr|Q9VNF3|Q9VNF3_DROME	27 kDa	3	5	1	4	4	1	2	1
CG1703 OS=Drosophila melanogaster GN=CG1703 PE=2 SV=1	tr|Q9VYW4|Q9VYW4_DROME	102 kDa	3	1	0	1	1	2	0	2	0
CG17593 OS=Drosophila melanogaster GN=CG17593-RA PE=2 SV=1	tr|Q9VQR9|Q9VQR9_DROME	54 kDa	3	4	2	4	2	0	4	2	0
CG1902, isoform A OS=Drosophila melanogaster GN=CG1902 PE=2 SV=1	tr|Q7K1M4|Q7K1M4_DROME	36 kDa	3	2		3	1		2	1	0
CG2025 OS=Drosophila melanogaster GN=CG2025 PE=2 SV=2	tr|Q9VYT3|Q9VYT3_DROME	133 kDa	3	3	0	6	2	3	5	2	0
CG31195 OS=Drosophila melanogaster GN=CG31195-RA PE=2 SV=2	tr|Q8IN49|Q8IN49_DROME	94 kDa	3	2	0	3	3	0	1	1	0
CG31999 OS=Drosophila melanogaster GN=CG10323 PE=2 SV=3	tr|Q9V4B8|Q9V4B8_DROME	102 kDa	3	2	0	0	1	0	4	2	1
CG32164 OS=Drosophila melanogaster GN=CG32164 PE=4 SV=2	tr|Q9VV82|Q9VV82_DROME	121 kDa	3	0	0	4	3	2	1	0	0
CG3226 OS=Drosophila melanogaster GN=CG3226 PE=2 SV=1	tr|Q9W3Y3|Q9W3Y3_DROME	26 kDa	3	2	1	2	3	0	0	1
CG32626, isoform E OS=Drosophila melanogaster GN=CG32626 PE=2 SV=4	tr|Q9VY76|Q9VY76_DROME	89 kDa	3	2	0	2	1	1	0	1	0
CG34179, isoform A OS=Drosophila melanogaster GN=CG34179 PE=4 SV=1	tr|A8DYV8|A8DYV8_DROME	21 kDa	3	2		1	4	1	2	2	0
CG4164 OS=Drosophila melanogaster GN=CG4164 PE=2 SV=1	tr|Q9VPQ2|Q9VPQ2_DROME	40 kDa	3	0	0	1	2	0	2	2
CG4365, isoform C OS=Drosophila melanogaster GN=CG4365 PE=2 SV=1	tr|Q8IPU3|Q8IPU3_DROME	39 kDa	3	6	1	2	1	2	2	2	0
CG4849 OS=Drosophila melanogaster GN=CG4849 PE=2 SV=1	tr|Q9VAX8|Q9VAX8_DROME	111 kDa	3	3	0	5	3	4	0	1	0
CG5174, isoform B OS=Drosophila melanogaster GN=CG5174 PE=4 SV=1	tr|A1ZB83|A1ZB83_DROME	39 kDa	3	1	0	1	2	0	3	1	0
CG5224 OS=Drosophila melanogaster GN=CG5224 PE=2 SV=1	tr|Q7JVZ8|Q7JVZ8_DROME	25 kDa	3	5	1	2	3	3	2	3	1
CG5482 OS=Drosophila melanogaster GN=CG5482 PE=2 SV=1	tr|Q7K3D4|Q7K3D4_DROME	45 kDa	3	4	0	4	3	1	3	2	1
CG5941 OS=Drosophila melanogaster GN=CG5941 PE=2 SV=1	tr|Q9W445|Q9W445_DROME	20 kDa	3	1	0	0	1	1	1	0	0
CG7946 OS=Drosophila melanogaster GN=CG7946 PE=2 SV=1	tr|Q9VAA9|Q9VAA9_DROME	53 kDa	3	3		2	2		1	0
CG7998 OS=Drosophila melanogaster GN=Mdh2 PE=2 SV=1	tr|Q9VEB1|Q9VEB1_DROME	35 kDa	3	1	0	2	1	1	5	4	3
CG8003 OS=Drosophila melanogaster GN=CG8003 PE=2 SV=1	tr|Q9VTB0|Q9VTB0_DROME	46 kDa	3	2	0	4	2	0	2	1	0
COP9 signalosome complex subunit 5 OS=Drosophila melanogaster GN=CSN5 PE=1 SV=1	sp|Q9XZ58|CSN5_DROME	37 kDa	3	0		1		0	1	1
Coronin OS=Drosophila melanogaster GN=coro PE=2 SV=1	tr|Q7JVY0|Q7JVY0_DROME	57 kDa	3	4	0	4	4	2	7	2	1
Coronin OS=Drosophila melanogaster GN=pod1 PE=3 SV=1	tr|A8JV09|A8JV09_DROME	139 kDa	3	1	0	2	1	0	0	0	0
Cul-2, isoform A OS=Drosophila melanogaster GN=Cul-2 PE=2 SV=3	tr|Q9V9R2|Q9V9R2_DROME	87 kDa	3	1	0	1	2	0	0	0	0
Cullin homolog 1 OS=Drosophila melanogaster GN=lin19 PE=1 SV=2	sp|Q24311|CUL1_DROME	90 kDa	3	3	0	2	0	0	0	0	0
Cysteine--tRNA ligase, cytoplasmic OS=Drosophila melanogaster GN=Aats-cys PE=1 SV=1	sp|Q7KN90|SYCC_DROME	84 kDa	3	3	0	2	2	2	3	0	0
Dihydropteridine reductase OS=Drosophila melanogaster GN=Dhpr PE=2 SV=1	tr|Q9VSU6|Q9VSU6_DROME	25 kDa	3	2	2	2	3	0	1	0	0
DNA-directed RNA polymerase II subunit RPB2 OS=Drosophila melanogaster GN=RpII140 PE=2 SV=2	sp|P08266|RPB2_DROME	134 kDa	3	3	0	7	2	0	1	0	0
Drab5 OS=Drosophila melanogaster GN=Rab5 PE=2 SV=1	tr|Q9V3I2|Q9V3I2_DROME	24 kDa	3	3	1	2	3	2	3	3	1
E3 ubiquitin-protein ligase listerin OS=Drosophila melanogaster GN=l(3)76BDr PE=1 SV=2	sp|Q9VW09|LTN1_DROME	199 kDa	3	2	0	1	0	0	0	0	0
Endonuclease G inhibitor OS=Drosophila melanogaster GN=EndoGI PE=1 SV=1	tr|Q9V3V9|Q9V3V9_DROME	41 kDa	3	2		2	2	0	1	0
ER membrane protein complex subunit 8/9 homolog OS=Drosophila melanogaster GN=CG3501 PE=1 SV=1	sp|Q9W1Y1|EMC89_DROME	23 kDa	3	2		3		2	0
FACT complex subunit Ssrp1 OS=Drosophila melanogaster GN=Ssrp PE=1 SV=2	sp|Q05344|SSRP1_DROME	82 kDa	3	7	1	3	2	1	1	2	0
FI16653p1 OS=Drosophila melanogaster GN=Srp72 PE=2 SV=1	tr|Q9VDK7|Q9VDK7_DROME	73 kDa	3	5	1	6	4	4	4	2	0
FI20117p1 OS=Drosophila melanogaster GN=eIF4AIII PE=2 SV=1	tr|Q9VHS8|Q9VHS8_DROME	46 kDa	3	1	3	3	2	5	2		1
GH01619p OS=Drosophila melanogaster GN=Rab2 PE=2 SV=1	tr|O18333|O18333_DROME	24 kDa	3	3	1	3	1	0	3	3	1
GH08269p OS=Drosophila melanogaster GN=tral PE=1 SV=3	tr|Q9VTZ0|Q9VTZ0_DROME	69 kDa	3	3	0	4	2	0	2	2
GH22474p OS=Drosophila melanogaster GN=Aats-his PE=2 SV=1	tr|Q9VWT1|Q9VWT1_DROME	58 kDa	3	4	0	1	1	3	1	0	0
GM04779p OS=Drosophila melanogaster GN=SrpRbeta PE=2 SV=2	tr|Q9VSN9|Q9VSN9_DROME	27 kDa	3	2	0	2	2	0	0	0	0
GM08921p OS=Drosophila melanogaster GN=Ntf-2 PE=2 SV=1	tr|Q9VRD6|Q9VRD6_DROME	15 kDa	3	4	0	4	3	2	6	3	2
GM12291p OS=Drosophila melanogaster GN=Tapdelta PE=2 SV=1	tr|Q7KLX3|Q7KLX3_DROME	18 kDa	3	2	3	2	3	5	3	3	7
GPI mannosyltransferase 3 OS=Drosophila melanogaster GN=CG12006 PE=2 SV=2	sp|Q9VZM5|PIGB_DROME	65 kDa	3	1		1	0	0	0	1	0
Histone deacetylase Rpd3 OS=Drosophila melanogaster GN=Rpd3 PE=1 SV=2	sp|Q94517|HDAC1_DROME	58 kDa	3	5	1	6	6	0	5	0	0
Kugelkern, isoform A OS=Drosophila melanogaster GN=kuk PE=2 SV=1	tr|Q8SX89|Q8SX89_DROME	60 kDa	3	0	0	0	0	0	0	0
La-related protein OS=Drosophila melanogaster GN=larp PE=1 SV=5	sp|Q9VAW5|LARP_DROME	178 kDa	3	2	1	3	3	4	2	1	2
Laminin subunit gamma-1 OS=Drosophila melanogaster GN=LanB2 PE=2 SV=2	sp|P15215|LAMC1_DROME	182 kDa	3	1	0	2	5	2	2	3	2
LD21116p OS=Drosophila melanogaster GN=Aats-tyr PE=2 SV=1	tr|Q9VV60|Q9VV60_DROME	58 kDa	3	5	2	5	7	5	3	4	1
LD24646p OS=Drosophila melanogaster GN=pch2 PE=2 SV=1	tr|Q8SX76|Q8SX76_DROME	47 kDa	3	3	1	2	2		1	0
LD26546p OS=Drosophila melanogaster GN=l(1)G0320 PE=2 SV=1	tr|Q9W335|Q9W335_DROME	33 kDa	3	2		3	2	2	4	3	2
LD37574p OS=Drosophila melanogaster GN=yps PE=2 SV=1	tr|Q95RE4|Q95RE4_DROME	38 kDa	3	0		1	0	1	1	1	0
Lipid storage droplets surface-binding protein 2 OS=Drosophila melanogaster GN=Lsd-2 PE=1 SV=1	sp|Q9VXY7|LSD2_DROME	38 kDa	3	6	2	4	4	1	5	3	0
Longitudinals lacking protein, isoforms J/P/Q/S/Z OS=Drosophila melanogaster GN=lola PE=1 SV=4	sp|Q9V5M6|LOLA5_DROME	103 kDa	3	1	0	0	0	0	0	0	0
Methylthioribose-1-phosphate isomerase OS=Drosophila melanogaster GN=CG11334 PE=2 SV=1	sp|Q9V9X4|MTNA_DROME	39 kDa	3	5	0	3	3	1	3	2
Mini spindles, isoform B OS=Drosophila melanogaster GN=msps PE=4 SV=1	tr|E1JIM4|E1JIM4_DROME	227 kDa	3	2	0	2	0	0	0	0	0
Multifunctional protein ADE2 OS=Drosophila melanogaster GN=ade5 PE=2 SV=2	sp|Q9I7S8|PUR6_DROME	47 kDa	3	3	0	2	2	1	3	1	1
Neurotactin OS=Drosophila melanogaster GN=Nrt PE=1 SV=3	sp|P23654|NRT_DROME	93 kDa	3	0	0	1	0	0	0	0	0
NHP2-like protein 1 homolog OS=Drosophila melanogaster GN=hoip PE=2 SV=1	sp|Q9U3Z7|NH2L1_DROME	14 kDa	3	1	0	1	1	5	0	1	0
Not1, isoform D OS=Drosophila melanogaster GN=Not1 PE=4 SV=1	tr|A8DY80|A8DY80_DROME (+2)	281 kDa	3	3	0	4	2	0	1	1	0
Nucleosomal histone kinase 1 OS=Drosophila melanogaster GN=ball PE=1 SV=1	sp|Q7KRY6|NHK1_DROME (+1)	66 kDa	3	2	0	0	0	0	0	0	0
Phagocyte signaling-impaired protein OS=Drosophila melanogaster GN=psidin PE=2 SV=1	sp|Q9VDQ7|NAA25_DROME	109 kDa	3	3	1	5	2	1	1	0
Phospholipase A2 activator protein OS=Drosophila melanogaster GN=Plap PE=2 SV=1	tr|Q9VPY2|Q9VPY2_DROME	86 kDa	3	8	1	4	3	1	3	1	0
Phosphoribosylformylglycinamidine synthase OS=Drosophila melanogaster GN=ade2 PE=1 SV=2	sp|P35421|PUR4_DROME	148 kDa	3	5	0	3	5	2	2	1	0
Pre-mRNA-processing factor 39 OS=Drosophila melanogaster GN=CG1646 PE=1 SV=1	sp|Q7KRW8|PRP39_DROME	121 kDa	3	2	0	1	2	0	1	1	0
Probable 6-phosphogluconolactonase OS=Drosophila melanogaster GN=CG17333 PE=2 SV=1	sp|Q9VZ64|6PGL_DROME	27 kDa	3	4	1	1	1	0	0	1
Probable actin-related protein 2/3 complex subunit 2 OS=Drosophila melanogaster GN=Arc-p34 PE=2 SV=2	sp|Q9VIM5|ARPC2_DROME	35 kDa	3	2	0	2	1	0	3	0	0
Probable dolichol-phosphate mannosyltransferase OS=Drosophila melanogaster GN=CG10166 PE=3 SV=1	sp|Q9VIU7|DPM1_DROME	27 kDa	3	1	1	3	3	1	3	2	1
Probable GDP-L-fucose synthase OS=Drosophila melanogaster GN=Gmer PE=2 SV=1	sp|Q9W1X8|FCL_DROME	36 kDa	3	1	0	2	1	0	0
Protein BCCIP homolog OS=Drosophila melanogaster GN=CG9286 PE=2 SV=2	sp|Q9VFR0|BCCIP_DROME	33 kDa	3	1		1	0			0
Protein kinase shaggy OS=Drosophila melanogaster GN=sgg PE=1 SV=3	sp|P18431|SGG_DROME (+2)	54 kDa	3	3	1	1	1	1	1	1	0
Protein NASP homolog OS=Drosophila melanogaster GN=CG8223 PE=1 SV=1	sp|Q9I7K6|NASP_DROME	52 kDa	3	2	0	4	2	0	3	2	0
Protein peanut OS=Drosophila melanogaster GN=pnut PE=1 SV=2	sp|P40797|PNUT_DROME	60 kDa	3	0	1	2	0	1	0	0	0
Protein rigor mortis OS=Drosophila melanogaster GN=rig PE=1 SV=1	sp|Q86BY9|RIG_DROME	138 kDa	3	1	0	2	0	1	0	0	0
Protein ROP OS=Drosophila melanogaster GN=Rop PE=2 SV=2	sp|Q07327|ROP_DROME	68 kDa	3	1		0	0	1	0	0	0
Putative fatty acyl-CoA reductase CG8306 OS=Drosophila melanogaster GN=CG8306 PE=2 SV=1	sp|Q960W6|FACR3_DROME	58 kDa	3	3	0	4	3	6	4	1	0
Putative hydroxypyruvate isomerase OS=Drosophila melanogaster GN=Gip PE=1 SV=1	sp|P36951|HYI_DROME	29 kDa	3	1	0	0	2	1	1	1
Putative oxidoreductase GLYR1 homolog OS=Drosophila melanogaster GN=CG4747 PE=1 SV=1	sp|Q8T079|GLYR1_DROME	65 kDa	3	4	1	3	2	1	1	1	0
Ras-like protein 3 OS=Drosophila melanogaster GN=R PE=2 SV=2	sp|P08645|RAS3_DROME	21 kDa	3	1	1	2	1	1	1	1	1
RE17611p OS=Drosophila melanogaster GN=RpL26 PE=2 SV=1	tr|Q9VVU2|Q9VVU2_DROME	17 kDa	3	3	1	2	0	0	3	3	3
Replication factor C 38kD subunit OS=Drosophila melanogaster GN=RfC38 PE=2 SV=1	tr|Q9U9Q1|Q9U9Q1_DROME	41 kDa	3	2	1	3	1	0	0	1
Replication factor C subunit 1 OS=Drosophila melanogaster GN=Gnf1 PE=1 SV=2	sp|P35600|RFC1_DROME	109 kDa	3	3	0	2	1	0		0	0
RH54244p OS=Drosophila melanogaster GN=yellow-c PE=2 SV=3	tr|Q9VJQ3|Q9VJQ3_DROME	49 kDa	3	9		4	14	8	12	14	6
S-methyl-5'-thioadenosine phosphorylase OS=Drosophila melanogaster GN=CG4802 PE=1 SV=1	sp|Q9V813|MTAP_DROME	32 kDa	3	1	1	1	1	1	0	1
Sc2 OS=Drosophila melanogaster GN=Sc2 PE=2 SV=1	tr|Q9VZL3|Q9VZL3_DROME	34 kDa	3	3	0	3	4	4	4	4	2
Sec31, isoform B OS=Drosophila melanogaster GN=sec31 PE=4 SV=1	tr|A1Z7J6|A1Z7J6_DROME (+1)	136 kDa	3	1	0	2	0	0	0	0	1
SelT-like protein OS=Drosophila melanogaster GN=CG3887 PE=2 SV=1	sp|Q9VMV6|SELT_DROME	22 kDa	3	3	3	4	2	2	5	2	3
Serine/threonine-protein phosphatase 4 catalytic subunit OS=Drosophila melanogaster GN=Pp4-19C PE=2 SV=1	sp|O76932|PP4C_DROME	35 kDa	3	3		2	0	1	2	1	0
Stromal interaction molecule homolog OS=Drosophila melanogaster GN=Stim PE=1 SV=1	sp|P83094|STIM_DROME (+2)	65 kDa	3	2	0	3	1	0	1	0	0
Transcription elongation factor S-II OS=Drosophila melanogaster GN=TfIIS PE=2 SV=1	sp|P20232|TFS2_DROME	34 kDa	3	3	0	3	2	3	1	2	0
UbiA prenyltransferase domain-containing protein 1 homolog OS=Drosophila melanogaster GN=heix PE=2 SV=1	sp|Q9V3R8|UBIA1_DROME	39 kDa	3	3	0	0	1		2	2
Uncharacterized protein CG16817 OS=Drosophila melanogaster GN=CG16817 PE=1 SV=1	sp|Q9VH95|YC17_DROME	21 kDa	3	2	1	1	2	2	1	2	1
V-type proton ATPase subunit E OS=Drosophila melanogaster GN=Vha26 PE=2 SV=1	sp|P54611|VATE_DROME	26 kDa	3	2	3	3	1	2	1	1	0
Vap-33-1, isoform A OS=Drosophila melanogaster GN=Vap-33-1 PE=2 SV=1	tr|Q7KVX5|Q7KVX5_DROME	27 kDa	3	7	4	9	9	10	6	3	0
Vinculin OS=Drosophila melanogaster GN=Vinc PE=1 SV=1	sp|O46037|VINC_DROME	106 kDa	3	2	0	2	2	0	1	0	0
Zinc finger CCCH domain-containing protein 15 homolog OS=Drosophila melanogaster GN=CG8635 PE=1 SV=1	sp|Q7JWR9|ZC3HF_DROME	45 kDa	3	0	0	2	2	0	3	1	0
Zn72D, isoform B OS=Drosophila melanogaster GN=Zn72D PE=2 SV=1	tr|Q86BI3|Q86BI3_DROME	96 kDa	3	0	0	1	1	1	0	0	0
40S ribosomal protein S13 OS=Drosophila melanogaster GN=RpS13 PE=2 SV=3	sp|Q03334|RS13_DROME	17 kDa	2	1	1	1	3	4	3	3	1
40S ribosomal protein S28 OS=Drosophila melanogaster GN=RpS28b PE=3 SV=2	sp|Q9W334|RS28_DROME	7 kDa	2	1	1	2	1	2	2	1	3
40S ribosomal protein S5b OS=Drosophila melanogaster GN=RpS5b PE=2 SV=1	sp|Q9VFE4|RS5B_DROME	26 kDa	2	1	1	0	1	2	2	2	1
5'-3' exoribonuclease 2 homolog OS=Drosophila melanogaster GN=Rat1 PE=1 SV=2	sp|Q9VM71|XRN2_DROME	104 kDa	2	1	0	2	1	0	0	0	0
60S ribosomal protein L28 OS=Drosophila melanogaster GN=RpL28 PE=2 SV=1	sp|Q9VZS5|RL28_DROME (+1)	16 kDa	2	2	2	2	4	6	2	2	3
60S ribosomal protein L31 OS=Drosophila melanogaster GN=RpL31 PE=1 SV=1	sp|Q9V597|RL31_DROME	15 kDa	2	1	2	2	2	6	1	1	4
Adapter molecule Crk OS=Drosophila melanogaster GN=Crk PE=2 SV=1	sp|Q9XYM0|CRK_DROME (+1)	31 kDa	2	1	0	2	0		0		0
ALG-2 interacting protein X OS=Drosophila melanogaster GN=ALiX PE=2 SV=1	tr|Q9VB05|Q9VB05_DROME	93 kDa	2	0	0	0	0	0		0
Angiotensin-converting enzyme-related protein OS=Drosophila melanogaster GN=Acer PE=1 SV=1	sp|Q9VLJ6|ACER_DROME	73 kDa	2	0	0	3	4	2	2	1	0
Annexin-B10 OS=Drosophila melanogaster GN=AnnX PE=2 SV=2	sp|P22465|ANX10_DROME	36 kDa	2	3	0	5	4	2	1	2
Annexin-B9 OS=Drosophila melanogaster GN=AnnIX PE=2 SV=2	sp|P22464|ANXB9_DROME (+1)	36 kDa	2	2	1	2	2	0	2	2	0
Anon-i1 protein OS=Drosophila melanogaster GN=anon-i1 PE=2 SV=1	tr|Q24050|Q24050_DROME	29 kDa	2	0		1	1		1	1
Antimeros OS=Drosophila melanogaster GN=atms PE=2 SV=1	tr|Q9VN55|Q9VN55_DROME	61 kDa	2	1	0	1	1	0	0	0	0
AP-2 complex subunit alpha OS=Drosophila melanogaster GN=alpha-Adaptin PE=1 SV=1	sp|P91926|AP2A_DROME	106 kDa	2	2	0	0	1	0	4	0	0
Armadillo segment polarity protein OS=Drosophila melanogaster GN=arm PE=1 SV=1	sp|P18824|ARM_DROME	91 kDa	2	0	0	1	0	0	0	0	0
Arpc3A, isoform C OS=Drosophila melanogaster GN=Arpc3A PE=2 SV=4	tr|Q9VF28|Q9VF28_DROME	20 kDa	2	1	0	1	0	0	0	0
Arrest defective 1, isoform A OS=Drosophila melanogaster GN=vnc PE=2 SV=1	tr|Q9VT75|Q9VT75_DROME	22 kDa	2	2	1	2	1	1	2	1	1
AT11165p OS=Drosophila melanogaster GN=CG9643 PE=2 SV=1	tr|Q9VQJ8|Q9VQJ8_DROME	25 kDa	2	0		2	0	0			0
AT13091p OS=Drosophila melanogaster GN=rngo PE=2 SV=1	tr|Q9VXF9|Q9VXF9_DROME	51 kDa	2	3	0	5	2	1	1	1
AT14148p OS=Drosophila melanogaster GN=CG2604 PE=2 SV=1	tr|Q9VN86|Q9VN86_DROME	47 kDa	2	2	0	2	3	0	3	0	0
AT18092p OS=Drosophila melanogaster GN=CG6084 PE=2 SV=1	tr|Q8IQF8|Q8IQF8_DROME	40 kDa	2	2	0	8	5	5	7	7	7
AT21416p OS=Drosophila melanogaster GN=Past1 PE=2 SV=1	tr|Q8T8W3|Q8T8W3_DROME	62 kDa	2	2	0	2	1	0	0	1	0
Ataxin-2 homolog OS=Drosophila melanogaster GN=Atx2 PE=1 SV=1	sp|Q8SWR8|ATX2_DROME	118 kDa	2	0	0	1	0	1	1
Atypical protein kinase C, isoform E OS=Drosophila melanogaster GN=aPKC PE=4 SV=1	tr|Q0E973|Q0E973_DROME	60 kDa	2	2	0	1	0	1	0	0
Autophagy-specific gene 7, isoform A OS=Drosophila melanogaster GN=Atg7 PE=2 SV=1	tr|Q7JY94|Q7JY94_DROME	77 kDa	2	3	0	1	1	2	2	0	0
Brahma associated protein 55kD OS=Drosophila melanogaster GN=Bap55 PE=2 SV=1	tr|Q7K012|Q7K012_DROME	47 kDa	2	1		0	0	1	0		0
Cap-G, isoform F OS=Drosophila melanogaster GN=Cap-G PE=4 SV=2	tr|A1Z987|A1Z987_DROME	154 kDa	2	0	0	0	0	0	0	0	0
CD98 heavy chain OS=Drosophila melanogaster GN=CD98hc PE=2 SV=1	tr|Q9VHX9|Q9VHX9_DROME	63 kDa	2	1	0	1				0
Ced-12 OS=Drosophila melanogaster GN=Ced-12 PE=2 SV=1	tr|Q9VKB2|Q9VKB2_DROME	83 kDa	2	0	0	1	0	0		0	0
CG10206-PA OS=Drosophila melanogaster GN=nop5 PE=2 SV=2	tr|Q9VM69|Q9VM69_DROME	57 kDa	2	3	0	3	0	0	0		0
CG10211 OS=Drosophila melanogaster GN=CG10211 PE=2 SV=3	tr|Q9VJ80|Q9VJ80_DROME	156 kDa	2	8	0	5	18	14	14	7	3
CG10373 OS=Drosophila melanogaster GN=Jwa PE=2 SV=3	tr|Q9VJ59|Q9VJ59_DROME	28 kDa	2	0	1	1	1	0	2	1
CG10470 OS=Drosophila melanogaster GN=CG10470 PE=2 SV=1	tr|Q9VJ11|Q9VJ11_DROME	21 kDa	2	1	1	1	2	4	1	1	2
CG10527 OS=Drosophila melanogaster GN=CG10527 PE=2 SV=1	tr|Q9W2M4|Q9W2M4_DROME	32 kDa	2	0	1	2	2	3	2	1
CG10627 OS=Drosophila melanogaster GN=nst PE=2 SV=1	tr|Q9VTZ4|Q9VTZ4_DROME	61 kDa	2	0	0			0	1	0
CG11784 OS=Drosophila melanogaster GN=CG11784 PE=2 SV=1	tr|Q7JVI6|Q7JVI6_DROME	26 kDa	2	2		1	0		0		0
CG11851 OS=Drosophila melanogaster GN=CG11851 PE=2 SV=1	tr|Q9VBV8|Q9VBV8_DROME	72 kDa	2	5	0	2	0	0	2	2	1
CG11999 OS=Drosophila melanogaster GN=CG11999 PE=2 SV=1	tr|Q9VNA3|Q9VNA3_DROME	24 kDa	2	0		1	1	1	1	1
CG12123 OS=Drosophila melanogaster GN=CG12123 PE=2 SV=1	tr|Q9W3F5|Q9W3F5_DROME	26 kDa	2	0	0	1	0	0	1	0	0
CG1236 OS=Drosophila melanogaster GN=CG1236 PE=2 SV=2	tr|Q8I725|Q8I725_DROME	38 kDa	2	4	1	0	0	0	3	3	0
CG12702 OS=Drosophila melanogaster GN=CG12702-RA PE=2 SV=1	tr|Q9VWC7|Q9VWC7_DROME	97 kDa	2	0	0	1	0	0	0	0	0
CG12918 OS=Drosophila melanogaster GN=sel PE=2 SV=1	tr|Q7JXF7|Q7JXF7_DROME	21 kDa	2		0	2	0	0	1	0
CG1316 OS=Drosophila melanogaster GN=CG1316 PE=2 SV=2	tr|Q9VZE4|Q9VZE4_DROME	52 kDa	2	1	0	3	2	1	0	1	0
CG14207, isoform A OS=Drosophila melanogaster GN=HspB8 PE=2 SV=1	tr|Q9VWG1|Q9VWG1_DROME	21 kDa	2	2	0	0				1
CG14544 OS=Drosophila melanogaster GN=CG14544 PE=2 SV=1	tr|Q9VBH7|Q9VBH7_DROME	35 kDa	2	1	0	2	1		1	1
CG15220 OS=Drosophila melanogaster GN=CG15220 PE=2 SV=1	tr|Q9VYW3|Q9VYW3_DROME	12 kDa	2	0	0			0	0
CG16892 OS=Drosophila melanogaster GN=CG16892-RA PE=2 SV=1	tr|Q9W351|Q9W351_DROME	52 kDa	2			2	0		0		0
CG16940, isoform A OS=Drosophila melanogaster GN=CG16940 PE=2 SV=2	tr|Q9W0T7|Q9W0T7_DROME	117 kDa	2	1	1	2	2	2	0	1	0
CG17078 OS=Drosophila melanogaster GN=CG17078-RA PE=2 SV=2	tr|Q9VPM7|Q9VPM7_DROME	68 kDa	2	3		2	1	0	0	0	0
CG17255, isoform A OS=Drosophila melanogaster GN=nocte PE=2 SV=4	tr|Q9W2U7|Q9W2U7_DROME	236 kDa	2	3	0	1	1	1	2	0	0
CG18815, isoform A OS=Drosophila melanogaster GN=CG18815 PE=2 SV=1	tr|Q9I7R0|Q9I7R0_DROME	23 kDa	2	2	0	1	3	3	1	1
CG2246, isoform B OS=Drosophila melanogaster GN=CG2246-RB PE=2 SV=1	tr|Q8IMI0|Q8IMI0_DROME (+1)	43 kDa	2	0	0	2	0	1	0	0	0
CG2446, isoform A OS=Drosophila melanogaster GN=Amun PE=2 SV=1	tr|Q9VYV4|Q9VYV4_DROME	58 kDa	2	4		1	0	2	1		0
CG2767, isoform B OS=Drosophila melanogaster GN=CG2767 PE=4 SV=1	tr|B7Z0V3|B7Z0V3_DROME (+1)	39 kDa	2	0		1	1	0	3	1	0
CG2807 OS=Drosophila melanogaster GN=CG2807 PE=2 SV=2	tr|Q9VPR5|Q9VPR5_DROME	150 kDa	2	2	0	4	4	2	0	0	1
CG30410 OS=Drosophila melanogaster GN=Rpi PE=2 SV=3	tr|Q8MLS2|Q8MLS2_DROME	27 kDa	2	3	0	2	2	1	3	2	1
CG31549 OS=Drosophila melanogaster GN=CG11005 PE=2 SV=1	tr|Q8SX57|Q8SX57_DROME	27 kDa	2	3		4	2	1	2	3
CG32066, isoform B OS=Drosophila melanogaster GN=CG6491 PE=2 SV=1	tr|Q7K1H0|Q7K1H0_DROME	37 kDa	2	3	0	0	0	0	0		0
CG32479 OS=Drosophila melanogaster GN=CG13903 PE=2 SV=2	tr|Q9W0L7|Q9W0L7_DROME	165 kDa	2	1	0	2	0	2	1	0	0
CG32495, isoform D OS=Drosophila melanogaster GN=GS PE=2 SV=2	tr|Q86B44|Q86B44_DROME	62 kDa	2	4	0	2	2	2	2	1	1
CG3287, isoform B OS=Drosophila melanogaster GN=CG3287 PE=4 SV=1	tr|A1Z6Q0|A1Z6Q0_DROME	52 kDa	2	3	0	0	1	0	0		0
CG3702 OS=Drosophila melanogaster GN=CG3702 PE=2 SV=2	tr|Q9VQX6|Q9VQX6_DROME	74 kDa	2	1	0	1	2	1	0	0	0
CG3909 OS=Drosophila melanogaster GN=CG3909 PE=2 SV=1	tr|Q9XZ19|Q9XZ19_DROME	36 kDa	2	2	0	1	1	0	0
CG4069 OS=Drosophila melanogaster GN=CG4069 PE=2 SV=1	tr|Q9VTZ7|Q9VTZ7_DROME	56 kDa	2	1		1	1	0	1	0	0
CG4300, isoform B OS=Drosophila melanogaster GN=CG4300 PE=2 SV=1	tr|Q9VTW1|Q9VTW1_DROME	42 kDa	2	0	1	2	0	0	2	0	0
CG4390, isoform B OS=Drosophila melanogaster GN=CG4390 PE=2 SV=1	tr|Q7KSB5|Q7KSB5_DROME (+1)	36 kDa	2	3	1	3	1	1	1	0
CG4764 OS=Drosophila melanogaster GN=CG4764 PE=2 SV=1	tr|Q9VPX5|Q9VPX5_DROME	20 kDa	2	2		1	1	1	0	0
CG4825 OS=Drosophila melanogaster GN=CG4825 PE=2 SV=1	tr|Q9VPD3|Q9VPD3_DROME	57 kDa	2	1	0	1	0	0	0	0	0
CG5126 OS=Drosophila melanogaster GN=CG5126 PE=2 SV=1	tr|Q9VPY7|Q9VPY7_DROME	53 kDa	2	4		3	2	0	1	2
CG5167 OS=Drosophila melanogaster GN=CG5167 PE=2 SV=1	tr|Q9VG81|Q9VG81_DROME	47 kDa	2	3	0	3	1	0	0		0
CG5726 OS=Drosophila melanogaster GN=CG5726 PE=2 SV=1	tr|Q7JRH5|Q7JRH5_DROME	87 kDa	2	2	0	1	0	0	0	0	0
CG5885 OS=Drosophila melanogaster GN=BEST:CK01296 PE=2 SV=1	tr|Q9VL69|Q9VL69_DROME	22 kDa	2	2	2		1	6	3	3	4
CG5946, isoform B OS=Drosophila melanogaster GN=CG5946-RB PE=2 SV=1	tr|Q4LDP7|Q4LDP7_DROME (+1)	36 kDa	2	0	0	0	0	0	0	0	0
CG6453 OS=Drosophila melanogaster GN=CG6453 PE=2 SV=1	tr|Q9VJD1|Q9VJD1_DROME	62 kDa	2	3	0	3	1	2	1	3	1
CG6673, isoform B OS=Drosophila melanogaster GN=CG6673 PE=2 SV=2	tr|Q9VSL4|Q9VSL4_DROME	29 kDa	2	4	0	2	2	1	2	2	0
CG6841 OS=Drosophila melanogaster GN=CG6841 PE=2 SV=2	tr|Q9VVU6|Q9VVU6_DROME	105 kDa	2	1	0	2	1	0		1	0
CG7182 OS=Drosophila melanogaster GN=CG7182 PE=2 SV=2	tr|Q9VSI1|Q9VSI1_DROME	57 kDa	2	3	0	2	2	1	1	1	0
CG7265 OS=Drosophila melanogaster GN=CG7265 PE=2 SV=1	tr|Q9VFE9|Q9VFE9_DROME	52 kDa	2	0				0	0	0
CG7484 OS=Drosophila melanogaster GN=CG7484 PE=1 SV=2	tr|Q9VVJ7|Q9VVJ7_DROME	20 kDa	2	2	1	2	2	1	1	2
CG7789 OS=Drosophila melanogaster GN=CG7789 PE=2 SV=1	tr|Q9VAG9|Q9VAG9_DROME	33 kDa	2	0	0	1	1	1			0
CG7911 OS=Drosophila melanogaster GN=CG7911 PE=2 SV=1	tr|Q9VAC4|Q9VAC4_DROME	17 kDa	2	1	0	1	1	0	2	0	0
CG8029, isoform A OS=Drosophila melanogaster GN=VhaAC45 PE=2 SV=1	tr|Q7JR49|Q7JR49_DROME	41 kDa	2	2		1	2		2	1	0
CG8108, isoform A OS=Drosophila melanogaster GN=CG8108 PE=2 SV=1	tr|Q9VT61|Q9VT61_DROME	103 kDa	2	1	0	3	2	0	0	0	0
CG8142 OS=Drosophila melanogaster GN=CG8142 PE=2 SV=2	tr|Q9VX15|Q9VX15_DROME	40 kDa	2	3	0	2	3	0	2	3	0
CG8207 OS=Drosophila melanogaster GN=CG8207 PE=2 SV=1	tr|Q8SXU3|Q8SXU3_DROME	48 kDa	2	0	0	1		1	1		0
CG8436 OS=Drosophila melanogaster GN=CG8436 PE=2 SV=1	tr|Q9VHG5|Q9VHG5_DROME	28 kDa	2	1		0	0	0		0
CG8963, isoform A OS=Drosophila melanogaster GN=CG8963 PE=2 SV=1	tr|Q7K581|Q7K581_DROME	63 kDa	2	3	0	5	1	1	0	0	0
CG9186, isoform A OS=Drosophila melanogaster GN=CG9186 PE=2 SV=1	tr|Q9W0H3|Q9W0H3_DROME	36 kDa	2	2		2	1	0	0
CG9257 OS=Drosophila melanogaster GN=CG9257 PE=2 SV=1	tr|Q9VIG0|Q9VIG0_DROME	39 kDa	2	1	1	1	2	0	3	1	0
CG9617 protein OS=Drosophila melanogaster GN=Sgt1 PE=2 SV=1	tr|Q9VHT3|Q9VHT3_DROME	20 kDa	2	2	0	0			0	0
Chorion peroxidase OS=Drosophila melanogaster GN=Pxt PE=2 SV=3	sp|Q9VEG6|PERC_DROME	91 kDa	2	3	0	1	0	1	2	0	0
Chromatin-remodeling complex ATPase chain Iswi OS=Drosophila melanogaster GN=Iswi PE=1 SV=1	sp|Q24368|ISWI_DROME	119 kDa	2	1	1	0	2	2	0	0	0
Coatomer subunit beta OS=Drosophila melanogaster GN=betaCop PE=2 SV=2	sp|P45437|COPB_DROME	107 kDa	2	2	0	3	0	0	1	1	0
Coatomer subunit gamma OS=Drosophila melanogaster GN=gammaCop PE=2 SV=1	sp|Q8I0G5|COPG_DROME	98 kDa	2	3	0	2	2	0	1	0	0
Condensin complex subunit 2 OS=Drosophila melanogaster GN=barr PE=2 SV=1	tr|Q9VIP9|Q9VIP9_DROME	83 kDa	2				0		0		0
COP9 signalosome complex subunit 7 OS=Drosophila melanogaster GN=CSN7 PE=1 SV=2	sp|Q9V4S8|CSN7_DROME	31 kDa	2	3	0	4	1	0	2	0	1
Cyclin-dependent kinase 1 OS=Drosophila melanogaster GN=cdc2 PE=1 SV=1	sp|P23572|CDK1_DROME	34 kDa	2	4	2	4	2	1	1	0	1
Cytochrome b5 OS=Drosophila melanogaster GN=Cyt-b5 PE=2 SV=1	sp|Q9V4N3|CYB5_DROME	15 kDa	2	1		2	2	1	1	2	1
DNA polymerase delta small subunit OS=Drosophila melanogaster GN=CG12018 PE=2 SV=1	sp|Q9W088|DPOD2_DROME	48 kDa	2	0		1
DNA repair protein Rad23 OS=Drosophila melanogaster GN=Rad23 PE=2 SV=1	tr|Q9V3W9|Q9V3W9_DROME	46 kDa	2	2	0	2	1	0	1	1
DNA-directed RNA polymerase II subunit RPB1 OS=Drosophila melanogaster GN=RpII215 PE=3 SV=4	sp|P04052|RPB1_DROME	209 kDa	2	1	0	1	0	0	0	0	0
Drab11 OS=Drosophila melanogaster GN=Rab11 PE=2 SV=1	tr|O18335|O18335_DROME	24 kDa	2	2	1	2	2	0	1	1
Drosha OS=Drosophila melanogaster GN=drosha PE=2 SV=1	tr|Q7KNF1|Q7KNF1_DROME	153 kDa	2	1	0	2	0	0	1	0	0
DXl6 protein OS=Drosophila melanogaster GN=x16 PE=2 SV=1	tr|Q9V3V0|Q9V3V0_DROME	28 kDa	2	2	0	2	2	2	0	1	0
E3 ubiquitin-protein ligase hyd OS=Drosophila melanogaster GN=hyd PE=1 SV=3	sp|P51592|HYD_DROME	319 kDa	2	1	0	2	2	0	0	0	0
EG:115C2.4 protein OS=Drosophila melanogaster GN=skpA PE=2 SV=1	tr|O77430|O77430_DROME	19 kDa	2	2	0	1	2		2	1
EG:152A3.1 protein OS=Drosophila melanogaster GN=Nmd3 PE=2 SV=1	tr|O46050|O46050_DROME	59 kDa	2	5	0	4	2	3	0
EG:34F3.8 protein OS=Drosophila melanogaster GN=Sec22 PE=2 SV=2	tr|O77434|O77434_DROME	25 kDa	2	3		3	2	3	2	1	0
EIF2B-epsilon protein OS=Drosophila melanogaster GN=eIF2B-epsilon PE=2 SV=1	tr|Q9W541|Q9W541_DROME	75 kDa	2	1	0	0	2	1	0	0
Eukaryotic translation initiation factor 3 subunit J OS=Drosophila melanogaster GN=Adam PE=1 SV=1	sp|Q7K550|EIF3J_DROME	27 kDa	2	1		0	1		1	1
Eukaryotic translation initiation factor 5 OS=Drosophila melanogaster GN=eIF5 PE=1 SV=1	sp|Q9VXK6|IF5_DROME	52 kDa	2	2	0	4	3	0	2	0
F-actin-capping protein subunit alpha OS=Drosophila melanogaster GN=cpa PE=2 SV=1	sp|Q9W2N0|CAPZA_DROME	33 kDa	2	3		1	2	2	2	2
F-box-like/WD repeat-containing protein ebi OS=Drosophila melanogaster GN=ebi PE=1 SV=2	sp|Q95RJ9|EBI_DROME	72 kDa	2	2		2	0		1	1	0
Fas-associated factor OS=Drosophila melanogaster GN=Faf PE=2 SV=1	tr|Q9VJ58|Q9VJ58_DROME	53 kDa	2	2	0	0	0				0
FI02870p OS=Drosophila melanogaster GN=Jheh2 PE=2 SV=1	tr|Q7KB18|Q7KB18_DROME	52 kDa	2	3	0	1	0	1	3	1	0
FI04408p OS=Drosophila melanogaster GN=Rox8 PE=2 SV=1	tr|Q8IMX4|Q8IMX4_DROME (+1)	50 kDa	2	2	0	1	2	1	1	0
FI20028p1 OS=Drosophila melanogaster GN=msi PE=2 SV=2	tr|Q8IMS8|Q8IMS8_DROME (+1)	66 kDa	2			0		0
GH07711p OS=Drosophila melanogaster GN=sds22 PE=2 SV=1	tr|Q9VEK8|Q9VEK8_DROME	38 kDa	2	3		3	1	1	1	2
GH12714p OS=Drosophila melanogaster GN=PpD3 PE=2 SV=1	tr|Q9VH81|Q9VH81_DROME	59 kDa	2	3	0	3	0	0	2	0	0
GH25379p OS=Drosophila melanogaster GN=Jafrac2 PE=2 SV=1	tr|Q9V3Q4|Q9V3Q4_DROME	27 kDa	2	2	1	2	1	4	1	2	0
Glutathione S-transferase S1 OS=Drosophila melanogaster GN=GstS1 PE=1 SV=2	sp|P41043|GST1_DROME (+1)	28 kDa	2	4	0	3	4	1	3	2
Guanine nucleotide-binding protein G(i) subunit alpha 65A OS=Drosophila melanogaster GN=G-ialpha65A PE=1 SV=2	sp|P20353|GNAI_DROME	41 kDa	2	1	0	1	1	0	1	1
Heterogeneous nuclear ribonucleoprotein 87F OS=Drosophila melanogaster GN=Hrb87F PE=2 SV=2	sp|P48810|RB87F_DROME (+1)	39 kDa	2	3	1	6	4	3	3	1	0
Hexokinase A, isoform A OS=Drosophila melanogaster GN=Hex-A PE=2 SV=1	tr|Q9W330|Q9W330_DROME	59 kDa	2	0		0	1		1	0
Hook-like, isoform A OS=Drosophila melanogaster GN=Acn PE=1 SV=1	tr|Q9VJ12|Q9VJ12_DROME	84 kDa	2	1	0	1	1	0	0		0
Host cell factor, isoform E OS=Drosophila melanogaster GN=Hcf PE=4 SV=1	tr|H9XVN5|H9XVN5_DROME	159 kDa	2	4	1	6	1	1	0	2	0
Importin subunit alpha OS=Drosophila melanogaster GN=Kap-alpha3 PE=2 SV=1	tr|Q9V455|Q9V455_DROME	57 kDa	2	2	0	1	1	0	1	0	0
Interleukin enhancer-binding factor 2 homolog OS=Drosophila melanogaster GN=CG5641 PE=2 SV=1	sp|Q9VG73|ILF2_DROME	44 kDa	2	1	0	1	1		0	0
IP02765p OS=Drosophila melanogaster GN=mRpS18C PE=2 SV=2	tr|Q9VA81|Q9VA81_DROME	16 kDa	2	5	4	3	3	6	4	3	7
Large subunit GTPase 1 homolog OS=Drosophila melanogaster GN=ns3 PE=1 SV=1	sp|Q9W590|LSG1_DROME	70 kDa	2	1	0	3	0	1	0	0	0
LD07294p OS=Drosophila melanogaster GN=Tap42 PE=2 SV=2	tr|Q9VJZ5|Q9VJZ5_DROME	43 kDa	2	0		1	0	0		0	0
LD12946p OS=Drosophila melanogaster GN=MSBP PE=2 SV=1	tr|Q9VXM4|Q9VXM4_DROME	28 kDa	2	1	0	0	1	1	0	0	0
LD16419p OS=Drosophila melanogaster GN=RhoGDI PE=2 SV=1	tr|Q9VW59|Q9VW59_DROME	23 kDa	2	1	1	1	2	0	2	1	0
LD18435p OS=Drosophila melanogaster GN=twin PE=2 SV=1	tr|Q7K112|Q7K112_DROME	63 kDa	2	5	0	4	2	0	2	3	0
LD21102p OS=Drosophila melanogaster GN=Ugt35a PE=2 SV=1	tr|Q9VGS9|Q9VGS9_DROME	61 kDa	2	0					0		0
LD31742p OS=Drosophila melanogaster GN=whd PE=2 SV=1	tr|Q7JQH9|Q7JQH9_DROME	89 kDa	2	4	0	1	1	2	2	1	0
LD40489p OS=Drosophila melanogaster GN=SF2 PE=2 SV=1	tr|Q9V3W7|Q9V3W7_DROME	28 kDa	2	3	1	2	2	0	2	2	0
LD45324p OS=Drosophila melanogaster GN=Prx5 PE=2 SV=1	tr|Q960M4|Q960M4_DROME	20 kDa	2	3	1	2	0	1	1		0
Licorne OS=Drosophila melanogaster GN=lic PE=2 SV=1	tr|O62602|O62602_DROME	38 kDa	2	2	1	2	1	1	0	0	1
Lissencephaly-1 homolog OS=Drosophila melanogaster GN=Lis-1 PE=1 SV=2	sp|Q7KNS3|LIS1_DROME	46 kDa	2	1	0	2	0	1	1		0
Methionine aminopeptidase OS=Drosophila melanogaster GN=CG13630 PE=2 SV=1	tr|Q9VC48|Q9VC48_DROME	42 kDa	2	0	0	1	1	0		1	0
Molybdenum cofactor synthesis protein cinnamon OS=Drosophila melanogaster GN=cin PE=1 SV=3	sp|P39205|CIN_DROME	66 kDa	2	2		1	1	1	0	0	0
Multiprotein Bridging Factor 1 OS=Drosophila melanogaster GN=mbf1 PE=2 SV=1	tr|Q9XZ03|Q9XZ03_DROME	16 kDa	2	1	0	2	2	0	0	1	0
NAD-dependent histone deacetylase Sir2 OS=Drosophila melanogaster GN=Sir2 PE=1 SV=1	sp|Q9VK34|SIR2_DROME	92 kDa	2	1		3	1	1	5	3	1
NEDD8-activating enzyme E1 catalytic subunit OS=Drosophila melanogaster GN=CG13343 PE=2 SV=1	sp|Q9V6U8|UBA3_DROME	50 kDa	2	1	0	1	0	0	0		0
NEDD8-conjugating enzyme Ubc12 OS=Drosophila melanogaster GN=CG7375 PE=2 SV=1	sp|Q9VSF3|UBC12_DROME	21 kDa	2		0	1	0	0	0	1	1
Neuroglian OS=Drosophila melanogaster GN=Nrg PE=1 SV=2	sp|P20241|NRG_DROME (+2)	144 kDa	2	2		1	3	1	1	1	0
Nicotinate phosphoribosyltransferase OS=Drosophila melanogaster GN=CG3714 PE=2 SV=2	sp|Q9VQX4|PNCB_DROME	62 kDa	2	0	0	1	0	0	1		0
Nuclear export mediator factor NEMF homolog OS=Drosophila melanogaster GN=Clbn PE=1 SV=2	sp|Q9VBX1|NEMF_DROME	113 kDa	2	1	0	1	0	0	1	1	0
Nuclear migration protein NudC OS=Drosophila melanogaster GN=nudC PE=2 SV=2	tr|Q9VVA6|Q9VVA6_DROME	38 kDa	2	3	0	2	3	6	2	2	0
Nucleoplasmin-like protein OS=Drosophila melanogaster GN=Nlp PE=1 SV=1	sp|Q27415|NLP_DROME	17 kDa	2	1		1	2	1	2	2	2
Nucleosome-remodeling factor subunit NURF301 OS=Drosophila melanogaster GN=E(bx) PE=1 SV=2	sp|Q9W0T1|NU301_DROME (+1)	301 kDa	2	0	0	0	0	0	0	0	0
Nup358 OS=Drosophila melanogaster GN=Nup358 PE=2 SV=2	tr|Q9VBU7|Q9VBU7_DROME	296 kDa	2	0	0	2	0	0	0	0	0
P-element somatic inhibitor, isoform A OS=Drosophila melanogaster GN=Psi PE=4 SV=1	tr|A1ZAK9|A1ZAK9_DROME	73 kDa	2	1	0	2	0	0	0	1	0
Peroxiredoxin 2540 OS=Drosophila melanogaster GN=Prx2540-2 PE=2 SV=1	tr|Q7JX87|Q7JX87_DROME	25 kDa	2	1	1	1	1	0	1
Phosphatidylinositide phosphatase SAC1 OS=Drosophila melanogaster GN=Sac1 PE=2 SV=1	sp|Q9W0I6|SAC1_DROME	68 kDa	2	3	1	1	1	0	2	1	0
Plexin A, isoform A OS=Drosophila melanogaster GN=plexA PE=2 SV=1	tr|Q9V491|Q9V491_DROME	218 kDa	2	1	0	1	0	0	0	1	0
Poly(U)-binding-splicing factor half pint OS=Drosophila melanogaster GN=pUf68 PE=1 SV=2	sp|Q8T6B9|PUF68_DROME	68 kDa	2	1	0	4	2	1	0		0
Polycomb protein l(1)G0020 OS=Drosophila melanogaster GN=l(1)G0020 PE=1 SV=2	sp|Q9W3C1|U202_DROME	113 kDa	2	1	1	3	0	0	0		0
Pre-mRNA processing factor 8 OS=Drosophila melanogaster GN=Prp8 PE=4 SV=1	tr|A1Z8U0|A1Z8U0_DROME	280 kDa	2	4	0	12	6	2	0	1	0
Probable aminoacyl tRNA synthase complex-interacting multifunctional protein 2 OS=Drosophila melanogaster GN=CG12304 PE=3 SV=1	sp|Q9VUR3|AIMP2_DROME	37 kDa	2	1	0	0	1	0	0	0
Probable prefoldin subunit 5 OS=Drosophila melanogaster GN=CG7048 PE=2 SV=1	sp|Q9VCZ8|PFD5_DROME (+1)	19 kDa	2	1		1	0	0	0
Probable protein phosphatase CG10417 OS=Drosophila melanogaster GN=CG10417 PE=1 SV=1	sp|Q7K4Q5|Y0417_DROME (+1)	72 kDa	2	4	1	1	1	1	1	0
Probable ubiquitin carboxyl-terminal hydrolase FAF OS=Drosophila melanogaster GN=faf PE=1 SV=2	sp|P55824|FAF_DROME	311 kDa	2	1	0	2	0	0	2	0	0
Proteasome subunit beta type OS=Drosophila melanogaster GN=Prosbeta5 PE=2 SV=1	tr|Q7K148|Q7K148_DROME	31 kDa	2	3	1	4	4	5	4	3	3
Protein Gawky OS=Drosophila melanogaster GN=gw PE=1 SV=1	sp|Q8SY33|GAWKY_DROME	143 kDa	2	2		0		0
Protein hu-li tai shao OS=Drosophila melanogaster GN=hts PE=1 SV=2	sp|Q02645|HTS_DROME	128 kDa	2	5	0	2	1	2	1	2	0
Protein no-on-transient A OS=Drosophila melanogaster GN=nonA PE=1 SV=2	sp|Q04047|NONA_DROME	77 kDa	2	3	0	6	3	0	1	1	0
Protein slender lobes OS=Drosophila melanogaster GN=sle PE=1 SV=1	sp|Q8INM3|SLE_DROME	159 kDa	2	3	0	0	0	0	0	0	0
Putative elongator complex protein 1 OS=Drosophila melanogaster GN=Elp1 PE=1 SV=2	sp|Q9VGK7|ELP1_DROME	143 kDa	2	1	0	0	0	1	0	0
Putative elongator complex protein 4 OS=Drosophila melanogaster GN=CG6907 PE=1 SV=1	sp|Q9VMQ7|ELP4_DROME	49 kDa	2	2	0	2	0		2		0
Putative oligosaccharyltransferase complex subunit CG9662 OS=Drosophila melanogaster GN=CG9662 PE=2 SV=3	sp|Q9VQP9|OSTC_DROME	17 kDa	2	2	0	2	1	1	2	1	2
Putative vitellogenin receptor OS=Drosophila melanogaster GN=yl PE=1 SV=2	sp|P98163|YL_DROME	220 kDa	2	0	0	0	0	0	1	0	0
Ras-like protein 1 OS=Drosophila melanogaster GN=Ras85D PE=1 SV=2	sp|P08646|RAS1_DROME	22 kDa	2	0		3	0	0	4	3	0
RE47308p OS=Drosophila melanogaster GN=Rbp1-like PE=2 SV=2	tr|Q9VYD8|Q9VYD8_DROME	17 kDa	2	1	0	2	2	1	1	0	0
RE74312p OS=Drosophila melanogaster GN=sar1 PE=2 SV=1	tr|Q9VD29|Q9VD29_DROME	22 kDa	2	4		2	1	0	4	2	0
Recombination repair protein 1 OS=Drosophila melanogaster GN=Rrp1 PE=1 SV=2	sp|P27864|RRP1_DROME	75 kDa	2	3	1	2	1	0	1	0
Ribosome biogenesis protein WDR12 homolog OS=Drosophila melanogaster GN=CG6724 PE=2 SV=1	sp|Q9VKQ3|WDR12_DROME	47 kDa	2	1	0	1		0
RNA-binding protein cabeza OS=Drosophila melanogaster GN=caz PE=2 SV=2	sp|Q27294|CAZ_DROME	39 kDa	2	1	0	1	1	0	1	1	0
RNA-binding protein lark OS=Drosophila melanogaster GN=lark PE=1 SV=1	sp|Q94901|LARK_DROME	40 kDa	2	2	0	2	2	1	1	2	0
S-adenosylmethionine synthase OS=Drosophila melanogaster GN=Sam-S PE=2 SV=2	sp|P40320|METK_DROME (+1)	45 kDa	2	1	1	2	3	2	0	1	1
SD07518p OS=Drosophila melanogaster GN=Spp PE=2 SV=1	tr|Q9VPQ7|Q9VPQ7_DROME	43 kDa	2	1	2	1	1	3	3	1	1
Sec13 OS=Drosophila melanogaster GN=sec13 PE=2 SV=1	tr|Q9V3J4|Q9V3J4_DROME	40 kDa	2	1		2	1	1	1	1	0
Septin-1 OS=Drosophila melanogaster GN=Sep1 PE=1 SV=1	sp|P42207|SEPT1_DROME	41 kDa	2	3	0	2	0	3	2	0
Signal peptidase complex subunit 3 OS=Drosophila melanogaster GN=Spase22-23 PE=2 SV=1	sp|Q9VCA9|SPCS3_DROME	20 kDa	2	2	0	0	2	1	1	0
Signal recognition particle 68 kDa protein OS=Drosophila melanogaster GN=Srp68 PE=2 SV=1	sp|Q9VSS2|SRP68_DROME	69 kDa	2	4	0	5	6	4	5	3	2
SP1070, isoform B OS=Drosophila melanogaster GN=uif PE=4 SV=1	tr|B7Z036|B7Z036_DROME	387 kDa	2	2	0	2	2	1	1	1	1
Spectrin alpha chain OS=Drosophila melanogaster GN=alpha-Spec PE=1 SV=2	sp|P13395|SPTCA_DROME	278 kDa	2	3	0	1	2	0	2	3	0
Splicing factor U2af 38 kDa subunit OS=Drosophila melanogaster GN=U2af38 PE=1 SV=2	sp|Q94535|U2AF1_DROME	30 kDa	2	1	0	1	1	0	2	1	0
SRPK, isoform A OS=Drosophila melanogaster GN=SRPK PE=2 SV=1	tr|Q0E965|Q0E965_DROME	85 kDa	2	1	0	1	1				0
Thioredoxin-related transmembrane protein 2 homolog OS=Drosophila melanogaster GN=CG11007 PE=2 SV=1	sp|Q7JW12|TMX2_DROME	31 kDa	2	2	1	2	2	2	2	2
Tho2, isoform B OS=Drosophila melanogaster GN=tho2 PE=4 SV=1	tr|E2QCS8|E2QCS8_DROME	189 kDa	2	0	0	4	1	1	0	0	0
Thymidylate synthase OS=Drosophila melanogaster GN=Ts PE=1 SV=2	sp|O76511|TYSY_DROME	37 kDa	2	1	0	2	1	4	1	1
Torsin-like protein OS=Drosophila melanogaster GN=torp4a PE=2 SV=2	sp|O77277|TORS_DROME	38 kDa	2	5	3	4	2	0	4	2	0
Transcription termination factor 2 OS=Drosophila melanogaster GN=lds PE=1 SV=2	sp|P34739|TTF2_DROME	118 kDa	2	1	0	0	0	2	0	1	0
Transportin, isoform A OS=Drosophila melanogaster GN=Trn PE=2 SV=1	tr|Q9VRV8|Q9VRV8_DROME	102 kDa	2	4	1	1	0		0	0	0
Trifunctional purine biosynthetic protein adenosine-3 OS=Drosophila melanogaster GN=ade3 PE=1 SV=2	sp|P00967|PUR2_DROME	144 kDa	2	4	0	1	1	1	1	0	0
tRNA (cytosine(34)-C(5))-methyltransferase OS=Drosophila melanogaster GN=CG6133 PE=2 SV=1	sp|Q9W4M9|NSUN2_DROME	84 kDa	2	4	1	3	1	0	0
Ubiquitin-conjugating enzyme E2-22 kDa OS=Drosophila melanogaster GN=UbcD4 PE=1 SV=2	sp|P52486|UBCD4_DROME	23 kDa	2	2		3	1	3	3	1
Ubiquitin-like modifier-activating enzyme 5 OS=Drosophila melanogaster GN=CG1749 PE=2 SV=1	sp|Q9VYY3|UBA5_DROME	44 kDa	2	1		0	2	0	0	0	0
UPF0528 protein CG10038 OS=Drosophila melanogaster GN=CG10038 PE=2 SV=1	sp|Q95RN0|U528_DROME	37 kDa	2	1	0	1	1	0		1	0
V-type proton ATPase subunit D 1 OS=Drosophila melanogaster GN=Vha36-1 PE=2 SV=1	sp|Q9V7D2|VATD1_DROME	28 kDa	2	1	0	1	1	1	1	0	0
40S ribosomal protein S12 OS=Drosophila melanogaster GN=RpS12 PE=2 SV=2	sp|P80455|RS12_DROME	15 kDa	1	2	1	1		3	1	1	2
Actin related complex p41 subunit OS=Drosophila melanogaster GN=Sop2 PE=2 SV=1	tr|O97182|O97182_DROME	42 kDa	1	1	0	2	1	2	1	0	0
Amalgam, isoform B OS=Drosophila melanogaster GN=Ama PE=2 SV=1	tr|Q7KSX2|Q7KSX2_DROME	37 kDa	1	0	0	0	0	0	2	2
Amidophosphoribosyltransferase OS=Drosophila melanogaster GN=Prat PE=1 SV=2	sp|Q27601|PUR1_DROME	60 kDa	1	4	1	3	3	4	4	6	3
Aos1 OS=Drosophila melanogaster GN=Aos1 PE=2 SV=1	tr|Q7KSM5|Q7KSM5_DROME	38 kDa	1	3	1	7	2	4	1	0	1
AP-1gamma, isoform B OS=Drosophila melanogaster GN=AP-1gamma PE=2 SV=1	tr|Q7KVR7|Q7KVR7_DROME (+1)	106 kDa	1	3	0	1	0		0	0	0
Aps, isoform A OS=Drosophila melanogaster GN=Aps PE=2 SV=1	tr|Q7JVG2|Q7JVG2_DROME	20 kDa	1	1		1	2	1	1	1
ARL-6-interacting protein 1 homolog OS=Drosophila melanogaster GN=CG10326 PE=2 SV=1	sp|Q9VES1|AR6P1_DROME	22 kDa	1	2	1	2	1	0	1	1	1
Armadillo repeat-containing protein 6 homolog OS=Drosophila melanogaster GN=CG5721 PE=1 SV=1	sp|Q7K486|ARMC6_DROME	51 kDa	1	1	0	2	1	0	1	0	0
AT02348p OS=Drosophila melanogaster GN=CG4169 PE=2 SV=1	tr|Q9VV75|Q9VV75_DROME	45 kDa	1	2		2	1	0	3	2	1
ATP synthase subunit beta, mitochondrial OS=Drosophila melanogaster GN=ATPsyn-beta PE=2 SV=3	sp|Q05825|ATPB_DROME	54 kDa	1	5	6	5	2	1	14	11	1
Baldspot, isoform A OS=Drosophila melanogaster GN=Baldspot PE=2 SV=2	tr|Q9VV87|Q9VV87_DROME	37 kDa	1	2	0	1		1	1	1
BcDNA.GH11023 OS=Drosophila melanogaster GN=BcDNA.GH11023 PE=2 SV=1	tr|Q9Y109|Q9Y109_DROME	79 kDa	1	2	0	1	0	2	0	0	0
BcDNA.GH11110 OS=Drosophila melanogaster GN=nito PE=2 SV=1	tr|Q7KMJ6|Q7KMJ6_DROME	89 kDa	1	2	0	3	2	0	0	0	0
BcDNA.LD23587 OS=Drosophila melanogaster GN=Hrd3 PE=2 SV=1	tr|Q9V415|Q9V415_DROME	89 kDa	1	0	1	2		1	3	0
Bocksbeutel alpha OS=Drosophila melanogaster GN=bocksbeutel PE=2 SV=1	tr|Q709R6|Q709R6_DROME (+1)	44 kDa	1	2	0	1	0	0	0		0
Calcium/calmodulin-dependent protein kinase type II alpha chain OS=Drosophila melanogaster GN=CaMKII PE=1 SV=1	sp|Q00168|KCC2A_DROME (+1)	60 kDa	1	3	0	1	0		0	0	0
Cathepsin L OS=Drosophila melanogaster GN=Cp1 PE=2 SV=2	sp|Q95029|CATL_DROME	42 kDa	1	1	0	1	0	1	1	2	0
CG10778 OS=Drosophila melanogaster GN=CG10778 PE=2 SV=2	tr|Q9W3M6|Q9W3M6_DROME	35 kDa	1	3	0	2		0		0
CG11200, isoform A OS=Drosophila melanogaster GN=CG11200 PE=2 SV=1	tr|Q7K0F7|Q7K0F7_DROME	40 kDa	1	1		1	3	1	0	0	0
CG11242 OS=Drosophila melanogaster GN=CG11242 PE=1 SV=1	tr|A1ZBM2|A1ZBM2_DROME	27 kDa	1	1	0	1	1		2	0
CG11790, isoform A OS=Drosophila melanogaster GN=CG11790 PE=2 SV=1	tr|Q8SWX6|Q8SWX6_DROME	33 kDa	1	2	1	2	2	3	1	0	0
CG11857, isoform A OS=Drosophila melanogaster GN=CG11857 PE=2 SV=1	tr|Q9VBU6|Q9VBU6_DROME	24 kDa	1	1	0	2	2	2	1	1	1
CG12117-PA OS=Drosophila melanogaster GN=Sptr PE=2 SV=1	tr|O76752|O76752_DROME	29 kDa	1	1		0	0	0	2	0
CG1291 OS=Drosophila melanogaster GN=CG1291 PE=2 SV=1	tr|Q9VZU8|Q9VZU8_DROME	49 kDa	1	2		1	0	0	1	0	0
CG1309 OS=Drosophila melanogaster GN=CG1309 PE=2 SV=1	tr|Q9VZF1|Q9VZF1_DROME	58 kDa	1	2	0	1	1	0	0	0	0
CG13887, isoform B OS=Drosophila melanogaster GN=CG13887 PE=2 SV=1	tr|Q9W0M4|Q9W0M4_DROME	26 kDa	1	0	1	2	1	0	0	0	2
CG14103 OS=Drosophila melanogaster GN=CG14103 PE=2 SV=2	tr|Q9VW40|Q9VW40_DROME	34 kDa	1	4		1	1	2	5	2	0
CG1532 OS=Drosophila melanogaster GN=CG1532 PE=2 SV=1	tr|Q9VRD4|Q9VRD4_DROME	32 kDa	1	1		1	2	1	0	0
CG17259 OS=Drosophila melanogaster GN=CG17259 PE=2 SV=1	tr|Q9VQL1|Q9VQL1_DROME	56 kDa	1	1	0	1	1	3	2	2	0
CG30467 OS=Drosophila melanogaster GN=CG8185 PE=2 SV=1	tr|Q7K4H1|Q7K4H1_DROME	58 kDa	1	2		0	0	0		0	0
CG31098 OS=Drosophila melanogaster GN=CG31098 PE=2 SV=2	tr|Q9VBT1|Q9VBT1_DROME	48 kDa	1	2		1	0		0		0
CG31120, isoform B OS=Drosophila melanogaster GN=CG13644 PE=2 SV=2	tr|Q9VC10|Q9VC10_DROME	60 kDa	1	1	0	0	1	0	3	1	0
CG31694 OS=Drosophila melanogaster GN=CG3098 PE=2 SV=2	tr|Q9VQI5|Q9VQI5_DROME	47 kDa	1	3	0	0	2	0	1	0	0
CG3209, isoform C OS=Drosophila melanogaster GN=CG3209-RA PE=2 SV=2	tr|Q9W1B5|Q9W1B5_DROME	52 kDa	1	2		1	1	1	2	2	1
CG3408 OS=Drosophila melanogaster GN=CG3408 PE=2 SV=1	tr|Q9VT05|Q9VT05_DROME	37 kDa	1	1		2	1	0	1	2	0
CG42611, isoform A OS=Drosophila melanogaster GN=mgl PE=4 SV=2	tr|A8JTM7|A8JTM7_DROME	530 kDa	1	2	0	1	2	1	5	0	0
CG5177 OS=Drosophila melanogaster GN=CG5177 PE=2 SV=1	tr|Q9VM18|Q9VM18_DROME	31 kDa	1	1	0	1	2	2	1	1	0
CG5958 OS=Drosophila melanogaster GN=CG5958-RA PE=2 SV=1	tr|Q9VM12|Q9VM12_DROME	34 kDa	1	1	0	2	1	2	0
CG6543, isoform A OS=Drosophila melanogaster GN=CG6543 PE=2 SV=1	tr|Q7JR58|Q7JR58_DROME	32 kDa	1	1		1	1		2	4	0
CG6697 OS=Drosophila melanogaster GN=Ublcp1 PE=1 SV=1	tr|Q9XZ16|Q9XZ16_DROME	37 kDa	1	1	1	1	1	2	1	1
CG6726, isoform A OS=Drosophila melanogaster GN=CG6726 PE=2 SV=2	tr|Q9VCR2|Q9VCR2_DROME	45 kDa	1	0		2	1	0	0	0	0
CG6750 OS=Drosophila melanogaster GN=CG6750 PE=2 SV=1	tr|Q9VKR0|Q9VKR0_DROME	28 kDa	1	2		1	1	0	2	1
CG7638 OS=Drosophila melanogaster GN=CG7638 PE=2 SV=2	tr|Q9VTF5|Q9VTF5_DROME	56 kDa	1	1		2	1		1	0
CG7834, isoform A OS=Drosophila melanogaster GN=CG7834 PE=2 SV=1	tr|Q0KHZ6|Q0KHZ6_DROME	27 kDa	1	2	0	2	0	0	1	0	0
CG8235 OS=Drosophila melanogaster GN=CG8235 PE=4 SV=1	tr|A1Z7K8|A1Z7K8_DROME	34 kDa	1	2	0	1	3	1	2	0	0
CG8444 OS=Drosophila melanogaster GN=VhaM8.9 PE=2 SV=1	tr|Q9VHG4|Q9VHG4_DROME	34 kDa	1	1		2	0	1	0		1
CG8503 OS=Drosophila melanogaster GN=CG8503 PE=2 SV=1	tr|Q7K561|Q7K561_DROME	59 kDa	1	1	0	1	1	1	2	1	0
CG9471, isoform A OS=Drosophila melanogaster GN=CG9471-RA PE=2 SV=1	tr|Q9VH72|Q9VH72_DROME	23 kDa	1	3	1	2	2	1	2	2
CG9934, isoform A OS=Drosophila melanogaster GN=CG9934 PE=2 SV=1	tr|Q9VK44|Q9VK44_DROME	139 kDa	1	2	0	1	1	0	1	1	0
CG9953 OS=Drosophila melanogaster GN=CG9953 PE=2 SV=1	tr|Q9VS02|Q9VS02_DROME	57 kDa	1	2		1	1	0	1	1
Chitinase-like protein CG5210 OS=Drosophila melanogaster GN=CG5210 PE=1 SV=2	sp|Q23997|C5210_DROME	50 kDa	1	3	1	2	1		1	0	0
Chloride intracellular channel OS=Drosophila melanogaster GN=Clic PE=1 SV=1	tr|Q9VY78|Q9VY78_DROME	30 kDa	1	2	0	1	1	0	1	0	0
Chromator, isoform A OS=Drosophila melanogaster GN=Chro PE=2 SV=1	tr|Q86BS3|Q86BS3_DROME	101 kDa	1	2	0	1	0	0	1	0	0
Cleavage and polyadenylation specificity factor subunit CG7185 OS=Drosophila melanogaster GN=CG7185 PE=1 SV=2	sp|Q9VSH4|CPSF6_DROME	71 kDa	1	0	0	3	0	0		0
CTP synthase OS=Drosophila melanogaster GN=CTPsyn PE=1 SV=2	sp|Q9VUL1|PYRG_DROME	69 kDa	1	2		2	0	1	1	0
Cullin-4, isoform A OS=Drosophila melanogaster GN=Cul-4 PE=2 SV=1	tr|Q5BI50|Q5BI50_DROME	94 kDa	1	3	0	1	1	0	1	0	0
Cullin-5 OS=Drosophila melanogaster GN=Cul-5 PE=2 SV=1	tr|Q9VAQ0|Q9VAQ0_DROME	97 kDa	1	2	0	1	0	0	0	0	0
Cysteine and histidine-rich domain-containing protein OS=Drosophila melanogaster GN=CHORD PE=1 SV=1	sp|Q9VCC0|CHRD1_DROME	40 kDa	1	1		2	1	0	2	1
Dipeptidase C OS=Drosophila melanogaster GN=Dip-C PE=2 SV=2	tr|Q9VG79|Q9VG79_DROME	55 kDa	1	4		0	0	0	0	1	0
DnaJ protein homolog 1 OS=Drosophila melanogaster GN=DnaJ-1 PE=1 SV=3	sp|Q24133|DNAJ1_DROME (+1)	37 kDa	1	2		1	4	0		0	0
Dolichyl-diphosphooligosaccharide--protein glycosyltransferase subunit DAD1 OS=Drosophila melanogaster GN=CG13393 PE=3 SV=1	sp|Q9VLM5|DAD1_DROME	13 kDa	1	1	2	1	1	2	2	1	1
Dynein light chain Tctex-type OS=Drosophila melanogaster GN=Dlc90F PE=1 SV=1	sp|Q94524|DYLT_DROME	12 kDa	1	3		0	1		1	1	1
eIF2B-delta, isoform B OS=Drosophila melanogaster GN=eIF2B-delta PE=2 SV=1	tr|Q0E8X6|Q0E8X6_DROME	62 kDa	1	2	0	1	1	0	1	1	0
Eukaryotic translation initiation factor 4E OS=Drosophila melanogaster GN=eIF-4E PE=1 SV=1	sp|P48598|IF4E_DROME	29 kDa	1	3	1	1		1	0	0
FI04781p OS=Drosophila melanogaster GN=Nop56 PE=2 SV=1	tr|Q95WY3|Q95WY3_DROME	55 kDa	1	2	0	2	1	1	0
FI18812p1 OS=Drosophila melanogaster GN=Unr PE=2 SV=1	tr|B7Z0E2|B7Z0E2_DROME	118 kDa	1	2		1	0	0	1	1	0
FI20034p1 OS=Drosophila melanogaster GN=SP1029 PE=2 SV=1	tr|Q0KI00|Q0KI00_DROME	108 kDa	1		0	3	3	2	3	1
Fimbrin OS=Drosophila melanogaster GN=Fim PE=2 SV=1	tr|O61604|O61604_DROME	72 kDa	1	1	0	2	1	0	2	0	0
GH08712p OS=Drosophila melanogaster GN=Snr1 PE=2 SV=2	tr|Q24090|Q24090_DROME	42 kDa	1	3		4	2	0	1
GH14654p OS=Drosophila melanogaster GN=GstE1 PE=2 SV=1	tr|Q7KK90|Q7KK90_DROME	25 kDa	1	1	0	2	1	0	1	1
GM01181p OS=Drosophila melanogaster GN=UK114 PE=2 SV=1	tr|Q9V3W0|Q9V3W0_DROME	15 kDa	1	3		3	3	1	4	2	0
GM27569p OS=Drosophila melanogaster GN=trsn PE=1 SV=1	tr|Q7JVK6|Q7JVK6_DROME	27 kDa	1	2	0	3	2	0	2	0
GST-containing FLYWCH zinc-finger protein OS=Drosophila melanogaster GN=gfzf PE=2 SV=1	tr|Q6NP69|Q6NP69_DROME	119 kDa	1	0	0	2	0	0	0	0	0
Histone-lysine N-methyltransferase eggless OS=Drosophila melanogaster GN=egg PE=1 SV=1	sp|Q32KD2|SETB1_DROME	142 kDa	1	2	0	0	0	0	0	0	0
Innexin inx2 OS=Drosophila melanogaster GN=inx2 PE=1 SV=1	sp|Q9V427|INX2_DROME (+1)	42 kDa	1	1		1		2	0	0
IP02321p OS=Drosophila melanogaster GN=Rpb7 PE=2 SV=2	tr|Q9VFB5|Q9VFB5_DROME	19 kDa	1	1	1	1	1		2		0
Juvenile hormone epoxide hydrolase 1 OS=Drosophila melanogaster GN=Jheh1 PE=2 SV=1	tr|Q7JRC3|Q7JRC3_DROME	55 kDa	1	0	0	0	0	0	3	0	0
Kinesin light chain OS=Drosophila melanogaster GN=Klc PE=1 SV=1	sp|P46824|KLC_DROME	58 kDa	1	2	1	1	1	1	1	1	0
Kinesin-like protein Klp10A OS=Drosophila melanogaster GN=Klp10A PE=1 SV=1	sp|Q960Z0|KI10A_DROME (+1)	89 kDa	1	3	0	1	1	0	1	1	0
L.2.35Df OS=Drosophila melanogaster GN=l(2)35Df PE=2 SV=1	tr|Q9Y134|Q9Y134_DROME	119 kDa	1	4	0	3	0	0	1	0	0
Lamin-C OS=Drosophila melanogaster GN=LamC PE=1 SV=2	sp|Q03427|LAMC_DROME	70 kDa	1	8	0	0	3	0	4	3
Laminin subunit alpha OS=Drosophila melanogaster GN=LanA PE=1 SV=2	sp|Q00174|LAMA_DROME	411 kDa	1	2	0	5	7	3	3	6	1
Laminin subunit beta-1 OS=Drosophila melanogaster GN=LanB1 PE=1 SV=4	sp|P11046|LAMB1_DROME	198 kDa	1	2	0	3	3	3	3	3	0
LD10773p OS=Drosophila melanogaster GN=ns4 PE=2 SV=1	tr|Q9VIJ9|Q9VIJ9_DROME	67 kDa	1	1		2	0	0	0	0	0
LD23292p OS=Drosophila melanogaster GN=Mcr PE=2 SV=1	tr|Q9VLT3|Q9VLT3_DROME	203 kDa	1	0	0	2	0	1	2	2	1
LD28935p OS=Drosophila melanogaster GN=Sep5 PE=2 SV=1	tr|Q7KLG8|Q7KLG8_DROME	48 kDa	1	2	0	1	0	1	1	1	0
LD37736p OS=Drosophila melanogaster GN=Zpr1 PE=2 SV=1	tr|Q9W379|Q9W379_DROME	51 kDa	1	1	0	2	1	0	0	0
Lethal (2) 09851 OS=Drosophila melanogaster GN=l(2)09851 PE=2 SV=1	tr|Q8SYL1|Q8SYL1_DROME	51 kDa	1	1		2	2	0		0
Lethal(2) giant larvae protein OS=Drosophila melanogaster GN=l(2)gl PE=1 SV=2	sp|P08111|L2GL_DROME	127 kDa	1	3	0	2	3	2	1	1	0
LP07226p OS=Drosophila melanogaster GN=mge PE=2 SV=1	tr|Q9VZL1|Q9VZL1_DROME	16 kDa	1	3		2	1
MEP-1, isoform A OS=Drosophila melanogaster GN=MEP-1 PE=2 SV=1	tr|Q0E8J0|Q0E8J0_DROME	124 kDa	1	2	1	1	3	1	0	1	0
Microsomal glutathione S-transferase-like, isoform A OS=Drosophila melanogaster GN=Mgstl PE=2 SV=1	tr|Q8SY19|Q8SY19_DROME	17 kDa	1	3	0	2	0	5	1	1	1
MIP08680p OS=Drosophila melanogaster GN=vib PE=2 SV=1	tr|Q9VDY8|Q9VDY8_DROME	31 kDa	1	2		0	1	0	0	3	1
Mitochondrial import receptor subunit TOM40 homolog 1 OS=Drosophila melanogaster GN=Tom40 PE=2 SV=2	sp|Q9U4L6|TO401_DROME	36 kDa	1	2		0	1		0	0
Molybdenum cofactor sulfurase OS=Drosophila melanogaster GN=mal PE=1 SV=1	sp|Q9VRA2|MOCOS_DROME	88 kDa	1	1	0	2		0	0	0	0
Myosin heavy chain, muscle OS=Drosophila melanogaster GN=Mhc PE=1 SV=4	sp|P05661|MYSA_DROME	224 kDa	1	3	9	0	7	5	13	5	1
NIF3-like protein 1 OS=Drosophila melanogaster GN=anon-35F/36A PE=2 SV=3	sp|Q9NK57|NIF3L_DROME	32 kDa	1	3		1		0			0
No mechanoreceptor potential A, isoform C OS=Drosophila melanogaster GN=nompA PE=4 SV=1	tr|A1Z8J3|A1Z8J3_DROME	174 kDa	1	2	0	1	3	4	9	9	7
Peptidyl-prolyl cis-trans isomerase OS=Drosophila melanogaster GN=CG14715 PE=2 SV=1	tr|Q9VGK3|Q9VGK3_DROME	15 kDa	1	1	1	2	2	1	1	1	0
Peroxiredoxin 6005 OS=Drosophila melanogaster GN=Prx6005 PE=2 SV=1	tr|Q9VQI7|Q9VQI7_DROME	25 kDa	1	2	0	2	1	0	1	1	0
Platelet-activating factor acetylhydrolase IB subunit beta homolog OS=Drosophila melanogaster GN=Paf-AHalpha PE=1 SV=1	sp|Q9VXP4|PA1B2_DROME	25 kDa	1	1	1	1	1	3	1	1
Probable 39S ribosomal protein L24, mitochondrial OS=Drosophila melanogaster GN=mRpL24 PE=1 SV=1	sp|Q9VMY1|RM24_DROME	29 kDa	1	1	0	2			1	0
Probable phenylalanine--tRNA ligase alpha subunit OS=Drosophila melanogaster GN=CG2263 PE=2 SV=1	sp|Q9W3J5|SYFA_DROME	56 kDa	1	2	0	2	0	0	0	0	0
Probable small nuclear ribonucleoprotein E OS=Drosophila melanogaster GN=SmE PE=3 SV=1	sp|Q9VLV5|RUXE_DROME	11 kDa	1	1	0	0	2	1	2	1	0
Prolyl 4-hydroxylase alpha-related protein PH4[alpha]EFB OS=Drosophila melanogaster GN=PH4alphaEFB PE=2 SV=2	tr|Q9VA69|Q9VA69_DROME	63 kDa	1	0	0	0		2	0	1	0
Protein groucho OS=Drosophila melanogaster GN=gro PE=1 SV=3	sp|P16371|GROU_DROME	80 kDa	1	2		2	0	0	0	0	0
Protein phosphatase methylesterase 1 OS=Drosophila melanogaster GN=CG5068 PE=2 SV=1	tr|Q95R98|Q95R98_DROME	45 kDa	1	1	0	2	0	0	1	0	0
Protein piwi OS=Drosophila melanogaster GN=piwi PE=2 SV=1	sp|Q9VKM1|PIWI_DROME	97 kDa	1	1	2	2	2	0	1	1	0
Protein purity of essence OS=Drosophila melanogaster GN=poe PE=1 SV=1	sp|Q9VLT5|POE_DROME	591 kDa	1	1	0	3	0	0	0	0	0
Putative GPI-anchor transamidase OS=Drosophila melanogaster GN=CG4406 PE=2 SV=1	sp|Q8T4E1|GPI8_DROME	40 kDa	1	2	0	3	1		2	1
Rae1 OS=Drosophila melanogaster GN=Rae1 PE=2 SV=1	tr|Q9W2E7|Q9W2E7_DROME	39 kDa	1	2	0	3	1	0	2	1	0
Regucalcin, isoform D OS=Drosophila melanogaster GN=regucalcin PE=2 SV=1	tr|Q76NR6|Q76NR6_DROME (+1)	35 kDa	1	2		1	0	1	1
Replication factor C subunit 2 OS=Drosophila melanogaster GN=RfC4 PE=2 SV=1	sp|P53034|RFC2_DROME	37 kDa	1	3	0	3	1			0
Rhea OS=Drosophila melanogaster GN=rhea PE=1 SV=1	tr|Q9VSL8|Q9VSL8_DROME	307 kDa	1	0	0	2	0	0	0	0	0
Ribonuclease H2 subunit A OS=Drosophila melanogaster GN=CG13690 PE=2 SV=1	sp|Q9VPP5|RNH2A_DROME	39 kDa	1	1	0	2	0		1	0	0
RNA-binding protein 4F OS=Drosophila melanogaster GN=Rnp4F PE=1 SV=1	sp|Q9W4D2|RNP4F_DROME (+1)	107 kDa	1	1	0	1	2	1	0	0	0
rRNA 2'-O-methyltransferase fibrillarin OS=Drosophila melanogaster GN=Fib PE=2 SV=1	sp|Q9W1V3|FBRL_DROME	35 kDa	1	0	0	2	0		0		0
Serine/threonine-protein phosphatase 2B catalytic subunit 2 OS=Drosophila melanogaster GN=Pp2B-14D PE=1 SV=2	sp|Q27889|PP2B2_DROME	63 kDa	1	2	0	4	1	1	3	1	0
Serrate RNA effector molecule homolog OS=Drosophila melanogaster GN=Ars2 PE=1 SV=2	sp|Q9V9K7|SRRT_DROME	107 kDa	1	1	0	2	2	0	1		0
Signal peptidase complex subunit 2 OS=Drosophila melanogaster GN=Spase25 PE=2 SV=1	sp|Q9VYY2|SPCS2_DROME	22 kDa	1	1	1	1	1	3	1	2	3
Small nuclear ribonucleoprotein Sm D3 OS=Drosophila melanogaster GN=SmD3 PE=1 SV=1	sp|O44437|SMD3_DROME	16 kDa	1	2		2	1	1	1	1	0
Small nuclear ribonucleoprotein-associated protein B OS=Drosophila melanogaster GN=SmB PE=1 SV=1	sp|Q05856|RSMB_DROME	21 kDa	1	1		3	3	0	1	0
SWI/SNF-related matrix-associated actin-dependent regulator of chromatin subfamily A containing DEAD/H box 1 homolog OS=Drosophila melanogaster GN=Etl1 PE=1 SV=1	sp|Q9VL72|SMRCD_DROME	95 kDa	1	3	0	2	0	1		0	0
TATA box binding protein-related factor 2, isoform E OS=Drosophila melanogaster GN=Trf2 PE=2 SV=1	tr|Q07DP5|Q07DP5_DROME	195 kDa	1	4	0	1	3	0	2	2	1
Transcription elongation factor SPT6 OS=Drosophila melanogaster GN=Spt6 PE=1 SV=1	sp|Q9W420|SPT6H_DROME	209 kDa	1	2	0	1	0	0	0	0	0
Tyrosine-protein phosphatase non-receptor type 61F OS=Drosophila melanogaster GN=Ptp61F PE=1 SV=1	sp|Q9W0G1|PTP61_DROME	62 kDa	1	2		2	0	0	0	0	0
Ubiquitin carboxyl-terminal hydrolase OS=Drosophila melanogaster GN=CG4165 PE=2 SV=1	tr|Q9W4C3|Q9W4C3_DROME	121 kDa	1	2	0	1	1	0	0	0	0
UPF0483 protein CG5412 OS=Drosophila melanogaster GN=CG5412 PE=2 SV=1	sp|Q9VDL1|U483_DROME	31 kDa	1	1	0	2	0	1	0	0
Vesicle-fusing ATPase 2 OS=Drosophila melanogaster GN=Nsf2 PE=2 SV=2	sp|P54351|NSF2_DROME	83 kDa	1	2	0	2	0	1	1	0	0
WD repeat-containing protein 26 homolog OS=Drosophila melanogaster GN=CG7611 PE=1 SV=1	sp|Q7K0L4|WDR26_DROME (+1)	70 kDa	1	1	0	3	1		1	1	0
Without children, isoform B OS=Drosophila melanogaster GN=woc PE=4 SV=1	tr|A8JRE3|A8JRE3_DROME (+1)	189 kDa	1	2	0	1	0	0	0	0	1
Aldehyde dehydrogenase OS=Drosophila melanogaster GN=Aldh PE=2 SV=1	tr|Q9VLC5|Q9VLC5_DROME	57 kDa	0	0	0	1		0	5	2	0
AT06125p OS=Drosophila melanogaster GN=CG6195 PE=2 SV=1	tr|Q9VDV2|Q9VDV2_DROME	41 kDa	0	1		1	1	1	2	0	0
AT08565p OS=Drosophila melanogaster GN=Txl PE=2 SV=1	tr|Q9VRP3|Q9VRP3_DROME	32 kDa	0	2	0	2	1	2	2	0	0
AT27789p OS=Drosophila melanogaster GN=glo PE=2 SV=1	tr|Q9VGH5|Q9VGH5_DROME	61 kDa	0	1		2	5	0	1	0
ATP synthase subunit alpha, mitochondrial OS=Drosophila melanogaster GN=blw PE=1 SV=2	sp|P35381|ATPA_DROME	59 kDa	0	2	5	3	2	0	9	9	5
ATP-dependent RNA helicase Ddx1 OS=Drosophila melanogaster GN=Ddx1 PE=2 SV=1	sp|Q9VNV3|DDX1_DROME	81 kDa	0	4	0	4	2	2	1	0
BG:DS07295.3 OS=Drosophila melanogaster GN=Pol32 PE=2 SV=1	tr|Q9Y118|Q9Y118_DROME	47 kDa	0	2	0	0	0		0	0	0
CG11190 OS=Drosophila melanogaster GN=CG11190 PE=2 SV=1	tr|Q9W3G0|Q9W3G0_DROME	71 kDa	0	4		1	2	1	1	2	0
CG12507 OS=Drosophila melanogaster GN=CG12507 PE=2 SV=2	tr|Q9VXJ3|Q9VXJ3_DROME	35 kDa	0	2		0	2	2	5	3	1
CG17322, isoform A OS=Drosophila melanogaster GN=BEST:LD25345 PE=2 SV=2	tr|Q9VJ45|Q9VJ45_DROME	58 kDa	0	0	0	2	1	0	4	2	0
CG30359, isoform A OS=Drosophila melanogaster GN=Mal-A5 PE=2 SV=1	tr|Q5U124|Q5U124_DROME	72 kDa	0	0	0	1	1		2	2	0
CG30360 OS=Drosophila melanogaster GN=Mal-A6 PE=4 SV=2	tr|A1Z7F1|A1Z7F1_DROME	68 kDa	0			0	0	0	5	3	2
CG31368, isoform C OS=Drosophila melanogaster GN=CG31368 PE=2 SV=4	tr|Q9VGG9|Q9VGG9_DROME	172 kDa	0		0	2	0	0	0	0	0
CG3244 OS=Drosophila melanogaster GN=Clect27 PE=2 SV=1	tr|Q8SZK9|Q8SZK9_DROME	26 kDa	0	1	0		1	0	2	1	0
CG4598 OS=Drosophila melanogaster GN=CG4598 PE=2 SV=2	tr|Q9VL68|Q9VL68_DROME	31 kDa	0					0		2
CG5510 OS=Drosophila melanogaster GN=CG5510 PE=2 SV=1	tr|Q9VCC2|Q9VCC2_DROME	38 kDa	0	1	0	3	2	0	3	2	1
CG5787 OS=Drosophila melanogaster GN=CG5787 PE=2 SV=2	tr|Q9VK59|Q9VK59_DROME	100 kDa	0	2	0	2	3	2	1	0	0
CG5915 protein OS=Drosophila melanogaster GN=Rab7 PE=2 SV=1	tr|O76742|O76742_DROME	23 kDa	0	2	0	0	0	0	3	2	0
CG6523 OS=Drosophila melanogaster GN=CG6523 PE=2 SV=1	tr|Q9VJZ6|Q9VJZ6_DROME	24 kDa	0	1		3	1	1	2	0	0
CG6995, isoform B OS=Drosophila melanogaster GN=Saf-B PE=2 SV=2	tr|Q8IMV6|Q8IMV6_DROME	102 kDa	0	1	0	4	3	1	1		0
CG7675, isoform B OS=Drosophila melanogaster GN=CG7675 PE=2 SV=2	tr|Q9VE80|Q9VE80_DROME	37 kDa	0	1	0		2	2	0	0	0
CG9747 OS=Drosophila melanogaster GN=CG9747 PE=2 SV=1	tr|Q9VA94|Q9VA94_DROME	53 kDa	0	1		1	2	1	1
Cheerio, isoform G OS=Drosophila melanogaster GN=cher PE=2 SV=2	tr|Q7KSF4|Q7KSF4_DROME	259 kDa	0	0	0	2	4	0	3	0	0
CHOp24 OS=Drosophila melanogaster GN=CHOp24 PE=2 SV=1	tr|Q9W4K0|Q9W4K0_DROME	23 kDa	0	1	0	0	0	1	1	2	0
Cht7 OS=Drosophila melanogaster GN=Cht7 PE=2 SV=3	tr|Q9VZV2|Q9VZV2_DROME	113 kDa	0	1		0	6	2	11	9	1
Contactin OS=Drosophila melanogaster GN=Cont PE=1 SV=2	sp|Q9VN14|CONT_DROME	158 kDa	0	1	0	1	3	1	2	1	0
COP9 signalosome complex subunit 2 OS=Drosophila melanogaster GN=alien PE=1 SV=2	sp|Q94899|CSN2_DROME	52 kDa	0	2	0	1	2	0	0		0
Delta-coatomer protein, isoform B OS=Drosophila melanogaster GN=deltaCOP PE=2 SV=1	tr|Q7K7G0|Q7K7G0_DROME	58 kDa	0	1	2	3	3	1	5	1	0
Elongation factor Tu OS=Drosophila melanogaster GN=EfTuM PE=3 SV=1	tr|A1Z9E3|A1Z9E3_DROME	54 kDa	0	0	0	0	0		2	0	0
Enhancer of mRNA-decapping protein 3 OS=Drosophila melanogaster GN=Edc3 PE=1 SV=1	sp|Q9VVI2|EDC3_DROME	73 kDa	0	2	0	0	0	0			0
GH06271p OS=Drosophila melanogaster GN=Mms19 PE=2 SV=1	tr|Q95U54|Q95U54_DROME	107 kDa	0	0	0	2	0	0	0		0
Heat shock 70 kDa protein cognate 5 OS=Drosophila melanogaster GN=Hsc70-5 PE=1 SV=2	sp|P29845|HSP7E_DROME	74 kDa	0	2	0	0	2	0	4	1	0
Juvenile hormone epoxide hydrolase 3 OS=Drosophila melanogaster GN=Jheh3 PE=2 SV=1	tr|Q7K1W4|Q7K1W4_DROME	54 kDa	0	0		2	3	0	3	0
Kismet, isoform C OS=Drosophila melanogaster GN=kis PE=4 SV=1	tr|B7Z002|B7Z002_DROME	593 kDa	0	0	0	0	0	1	2	0	0
Lachesin OS=Drosophila melanogaster GN=Lac PE=2 SV=2	sp|Q24372|LACH_DROME	40 kDa	0	1		2	1	1	3	2
LD08669p OS=Drosophila melanogaster GN=slmb PE=2 SV=1	tr|Q9VDE3|Q9VDE3_DROME	59 kDa	0	0	0	2		0	1
LD25575p OS=Drosophila melanogaster GN=P58IPK PE=2 SV=1	tr|Q9VHA8|Q9VHA8_DROME	57 kDa	0	1	0	1	1	0	2	0	0
LD29830p OS=Drosophila melanogaster GN=Srp54 PE=2 SV=1	tr|Q9VL71|Q9VL71_DROME	58 kDa	0	1	0	1	2	1	0	0	0
Membrane-associated protein Hem OS=Drosophila melanogaster GN=Hem PE=2 SV=1	sp|P55162|HEM_DROME	129 kDa	0	1	0	2	1	0	0	0	0
Mitogen-activated protein kinase ERK-A OS=Drosophila melanogaster GN=rl PE=1 SV=2	sp|P40417|ERKA_DROME	49 kDa	0	2	0	2	0	1	0	0	0
Muscle-specific protein 20 OS=Drosophila melanogaster GN=Mp20 PE=2 SV=2	sp|P14318|MP20_DROME	20 kDa	0	3	0		4		5	5	3
Myosin heavy chain 95F OS=Drosophila melanogaster GN=jar PE=2 SV=4	sp|Q01989|MYS9_DROME	143 kDa	0	2	0	2	2	1	1	0	0
O-glucosyltransferase rumi OS=Drosophila melanogaster GN=rumi PE=1 SV=1	sp|Q8T045|RUMI_DROME	48 kDa	0	2	0	0	1	1	1	0
Polyadenylate-binding protein 2 OS=Drosophila melanogaster GN=Pabp2 PE=2 SV=1	sp|Q7KNF2|PABP2_DROME (+1)	25 kDa	0	2	0	2		0		0	0
Polycomb protein Su(z)12 OS=Drosophila melanogaster GN=Su(z)12 PE=1 SV=1	sp|Q9NJG9|SUZ12_DROME	100 kDa	0	3	0	0	0	0	0	0	0
Protein 4.1 homolog OS=Drosophila melanogaster GN=cora PE=1 SV=1	sp|Q9V8R9|41_DROME	184 kDa	0	1	0	1	2	2	0	0	0
Putative cysteine proteinase CG12163 OS=Drosophila melanogaster GN=CG12163 PE=2 SV=2	sp|Q9VN93|CPR1_DROME	69 kDa	0	1		2	1	1	1	2	0
Ras-like GTP-binding protein Rho1 OS=Drosophila melanogaster GN=Rho1 PE=1 SV=1	sp|P48148|RHO1_DROME (+1)	22 kDa	0	0	0	1	1	2	1	1	2
RE01954p OS=Drosophila melanogaster GN=row PE=2 SV=1	tr|Q5U156|Q5U156_DROME	144 kDa	0	0	0	3	0	0	0	0	0
SD11922p OS=Drosophila melanogaster GN=Spn6 PE=2 SV=1	tr|Q7JV69|Q7JV69_DROME	42 kDa	0	1	0	3	0		0	1	0
Serine protease inhibitor 43Aa OS=Drosophila melanogaster GN=Spn43Aa PE=2 SV=1	tr|Q7KA66|Q7KA66_DROME	45 kDa	0	1		2	2			1	0
Superoxide dismutase [Mn], mitochondrial OS=Drosophila melanogaster GN=Sod2 PE=2 SV=3	sp|Q00637|SODM_DROME	25 kDa	0	1				0	1	2	0
Transmembrane emp24 domain-containing protein eca OS=Drosophila melanogaster GN=eca PE=2 SV=2	sp|Q9I7K5|TMEDE_DROME	25 kDa	0	2		1	1	2	1	2	2
Tropomyosin-2 OS=Drosophila melanogaster GN=Tm2 PE=2 SV=1	sp|P09491|TPM2_DROME	33 kDa	0	0	0	0	2	0	1	1	1
UPF0587 protein CG4646 OS=Drosophila melanogaster GN=CG4646 PE=2 SV=1	sp|A1Z9A2|U587_DROME	19 kDa	0	1	0	1	0	2	0	0	0
V-type proton ATPase subunit C OS=Drosophila melanogaster GN=Vha44 PE=2 SV=5	sp|Q9V7N5|VATC_DROME (+1)	92 kDa	0	1	0	1	3	1	4	2	1
Aconitase, isoform B OS=Drosophila melanogaster GN=Acon PE=2 SV=2	tr|Q9VIE8|Q9VIE8_DROME	85 kDa		0		0	0		3	0	0
BcDNA.GH12558 OS=Drosophila melanogaster GN=Mtpalpha PE=2 SV=1	tr|Q9V397|Q9V397_DROME	84 kDa		0	0	0	0	0	3	1	1
BcDNA.LD29885 OS=Drosophila melanogaster GN=epsilonCOP PE=2 SV=1	tr|Q9Y0Y5|Q9Y0Y5_DROME	35 kDa		0		2
CG13220 OS=Drosophila melanogaster GN=CG13220 PE=2 SV=1	tr|Q6NP72|Q6NP72_DROME	16 kDa		1		2	0	0	1
CG17293 OS=Drosophila melanogaster GN=Wdr82 PE=2 SV=1	tr|Q9VLN1|Q9VLN1_DROME	35 kDa		3						0
CG18259 OS=Drosophila melanogaster GN=CG18259-RA PE=2 SV=2	tr|Q9VWQ6|Q9VWQ6_DROME	53 kDa			0	2	0				0
CG3731, isoform A OS=Drosophila melanogaster GN=CG3731 PE=2 SV=2	tr|Q9VFF0|Q9VFF0_DROME	52 kDa		0	0	0			2	1	1
CG4781 OS=Drosophila melanogaster GN=CG4781 PE=2 SV=1	tr|Q9W128|Q9W128_DROME	53 kDa		0	0	0	1	0	4	2	0
CG5854, isoform A OS=Drosophila melanogaster GN=CG5854 PE=2 SV=1	tr|Q9VCF8|Q9VCF8_DROME	42 kDa		2	1	0	0	0	1		0
CG9796 OS=Drosophila melanogaster GN=CG9796 PE=2 SV=1	tr|Q95RA9|Q95RA9_DROME	28 kDa		1		2	1	0	1	1	0
FI17828p1 OS=Drosophila melanogaster GN=Fas3 PE=2 SV=1	tr|A8DZ14|A8DZ14_DROME	63 kDa		0	0	0	1	1	2	0	1
Glutathione S-transferase 1-1 OS=Drosophila melanogaster GN=GstD1 PE=1 SV=1	sp|P20432|GSTT1_DROME	24 kDa		1		4	3	6	4	2	3
Heat shock protein 22 OS=Drosophila melanogaster GN=Hsp22 PE=1 SV=4	sp|P02515|HSP22_DROME	20 kDa				0	3			0
HL08109p OS=Drosophila melanogaster GN=yip2 PE=2 SV=1	tr|Q9VL70|Q9VL70_DROME	42 kDa		0				0	4	1	0
LP19846p OS=Drosophila melanogaster GN=Ndg PE=2 SV=1	tr|A1Z877|A1Z877_DROME	149 kDa		0		1	0	0	2	0	0
Mini-chromosome maintenance complex-binding protein OS=Drosophila melanogaster GN=CG3430 PE=1 SV=1	sp|Q9VM60|MCMBP_DROME	68 kDa		1		2		0
Multiple inositol polyphosphate phosphatase 1, isoform A OS=Drosophila melanogaster GN=Mipp1 PE=2 SV=2	tr|Q9VV72|Q9VV72_DROME	54 kDa		0		0	0	0	2	0	0
Pre-mRNA branch site p14-like protein OS=Drosophila melanogaster GN=CG13298 PE=2 SV=1	sp|Q9VRV7|PM14_DROME	14 kDa		1		3	3		0	1	0
Ubiquitin fusion degradation protein 1 homolog OS=Drosophila melanogaster GN=Ufd1-like PE=2 SV=1	sp|Q9VTF9|UFD1_DROME	35 kDa		1	0	2	0	0		0
