# Supplementary material for: Rif1 inhibits replication fork progression and controls DNA copy number in Drosophila
Source: eLife. 2018 Oct 2;7:e39140. doi: 10.7554/eLife.39140 (PMC6185109; doi:10.7554/eLife.39140)
Supplement: Figure 3—figure supplement 2—source data 1. [file elife-39140-fig3-figsupp2-data1.xlsx]

## Sheet: Sheet1
WT	SUUR-	Rif1-
0.433071	0.112903	0.572917
0.418033	0.1	0.633333
0.159091	0.25	0.545455
0.153153	0.345679	0.382022
0.177966	0.236641	0.4125
0.213592	0.229008	0.345455
0.260417	0.277778	0.464646
0.208333	0.365854	0.44898
0.0645161	0.261905	0.371134
