# Supplementary material for: Rif1 inhibits replication fork progression and controls DNA copy number in Drosophila
Source: eLife. 2018 Oct 2;7:e39140. doi: 10.7554/eLife.39140 (PMC6185109; doi:10.7554/eLife.39140)
Supplement: Figure 3—source data 1. [file elife-39140-fig3-data1.xlsx]

## Sheet: Sheet1
	Wild type			SuUR			Rif1-
11A	0.314286	0.294802	0.239466	0.705621	0.771552	0.957955	0.994805	1.42468
35D	0.130314	0.119015	0.100719	0.892012	1.01207	1.01818	0.976623	1.43269
70C	0.225784	0.170315	0.144913	0.717456	0.798276	0.813636	0.841558	0.839744
3LHet	0.103136	0.107387	0.0976362	0.610947	0.581034	0.761364	0.851948	0.913462
