# Supplementary material for: Rif1 inhibits replication fork progression and controls DNA copy number in Drosophila
Source: eLife. 2018 Oct 2;7:e39140. doi: 10.7554/eLife.39140 (PMC6185109; doi:10.7554/eLife.39140)
Supplement: Figure 4—figure supplement 1—source data 1. [file elife-39140-fig4-figsupp1-data1.xlsx]

## Sheet: Sheet1
Wild_type	Rif1-
8	9		*combined data for 5 biological replicates
8	13
8	10
14	10B
10B	10B
13	10
8	12
9	13
10B	11
8	9
7	10
10	14
9	13
7	10
9	8
10	13
13	10B
10	9
10B	9
7	8
8	13
8	13
9	14
10B	13
10B	9
9	10B
14	12
9	13
8	9
7	10
13	13
13	10B
10B	8
10B	10B
13	8
9	10
10	9
10	9
7	8
7	10
14	8
14	9
9	10
13	10
8	10
10B	9
7	10
9	10
10	9
7	9
9	9
10B	9
9	8
7	14
7	14
10B	13
7	11
13	11
14	10B
14	10B
13	10B
13	8
13	12
9	10B
12	10
8	14
10B	9
10B	8
9	8
7	8
13	14
13	10B
7	13
9	9
13	9
14	8
14	9
9	10
9	8
10	10B
10	12
10B	13
7	8
10B	10
7	10
14	8
13	14
13	9
13	8
11	13
8	13
9	9
9	9
10B	14
10B	14
8	9
14	10
14	10
10B	9
8	8
14	13
9	12
10	9
10	10B
8	9
8	9
14	10
14	10
14	14
13	14
10	14
10	10B
10	13
10B	13
8	9
10	11
9	13
8	9
7	9
10	10B
7	8
12	13
12	10
12	9
10	12
7	12
9	14
7	10
14	9
9	8
7	8
14	10
10	10B
8	10
13	8
10	8
10	8
7	14
14	14
9	11
9	10
14	8
13	13
10B	13
7	11
8	8
13	14
7	14
11	14
7	14
10B	10
7	9
10	9
9	13
7	14
11	10
8	9
8	9
10B	12
13	13
8	14
8	13
11	13
10B	13
9	13
10	8
9	9
13	9
10B	9
8	7
8	8
14	8
12	9
8	7
10	7
8	9
10B	10
10	14
7	14
14	14
12	9
9	9
10	9
10	7
12	7
7	14
14	13
9	13
7	14
7	10
14	7
14	13
9	8
8	14
11	10
7	10
8	7
7	10B
10	9
10	9
10B	7
14	14
14	14
13	12
10	8
10B	14
14	14
9	13
7	12
14	10
8	14
7	10
8	10B
8	7
9	14
7	9
12	9
12	8
14	7
14	13
14	8
14	8
14	9
9	10
9	14
9	9
8	14
9	14
10B	10B
10B	12
10B	8
10B	8
10	14
14	10B
8	14
10B	14
9	14
8	10
8	8
14	7
10B	7
14	10
13	10
14	7
14	7
14	7
13	7
12	7
10B	9
8	14
14	14
9	13
9	8
10B	10
7	7
7	13
10B	8
10B	8
10	8
7	14
8	4
14	14
10B	14
10	14
8	14
7	14
10B	14
7	14
12	9
8	8
10	14
10	8
10B	12
7	11
14	13
8	10
8	8
14	7
13	12
13	8
10B	9
7	7
14	10B
7	10B
9	11
13	7
14	8
14	14
14	14
10	14
7	10B
7	7
10B	14
9	9
14	10B
11	10B
7	9
11	7
11	12
14	14
7	14
7	14
8	9
8	14
9	10B
10B	7
0	8
7	9
7	9
13	10B
8	14
14	14
14	10B
9	10
9	8
9	13
13	8
13	10B
14	9
14	10
10B	7
10	12
7	8
8	13
13	14
14	10
7	8
8	13
11	8
9	10B
14	9
12	10
7	7
7	12
10	8
10	13
14	14
14	10
14	7
10B	13
9	8
7	14
14	12
10B	8
7	8
10B	10
8	10
10B	7
10B	14
8	10B
7	9
7	7
8	13
9	8
9	8
11	10B
8	7
7
9	10
12	13
14	14
13	14
8	14
9	14
7	10
10B	7
10	10
9	7
8	10B
7	10
7	7
12	14
9	14
7	14
10B	10B
10B	11
14	14
8	8
7	14
9	14
7	10B
9	10
8	9
10B	7
8	7
7	7
7	14
8	14
7	14
10B	12
10B	12
10	7
8	7
8	9
8	14
8	14
7	13
14	8
14	8
11	10
8	14
7	7
13	8
10B	9
10	10
8	8
7	14
13	14
11	14
10	14
12	14
9	14
10B	14
10B	14
14	14
14	14
14	14
9	14
7	14
12	14
14	14
14	14
8	14
12	9
10B	7
8	10B
9	8
	8
7	8
14	10B
8	11
10	14
10	11
10	8
12	9
14	10B
14	10B
14	7
14	7
10	13
10B	14
8	10B
13	10
13	7
9	8
9	14
10B	10B
13	7
14	9
12	7
12	10B
9	7
13	8
9	8
14	10
10	14
14	13
9	14
9	14
10	14
10	14
10B	14
10B	13
9	13
8	10B
8	8
14	14
10B	13
10	14
7	10B
14	8
14	13
14	14
10	14
7	9
7	9
7	8
7	8
7	7
9	14
9	12
7	7
9	7
14	8
14	14
7	14
10	14
14	14
8	8
10B	14
10	14
9	10B
14	10B
14	8
14	8
7	14
7	11
9	8
10	10B
14	10B
12	8
14	14
13	12
11	12
8	9
10	12
9	10
8	10B
7	8
13	8
9	7
7	14
8	13
10B	9
13	7
14	14
14	14
14	14
14	14
14	12
14	14
14	8
14	10B
14	14
14	14
14	10B
14	8
14	10
14	7
14	8
7	13
10B	13
12	14
12	14
10B	14
11	10
7	7
8	13
8	9
10	9
8	7
8	11
13	11
13	7
10B	14
8	10
10B	10B
14	8
9	9
7	8
10B	8
9	10B
9	13
8	13
9	9
10B	9
7	10
11	8
8	7
8	8
9	9
7	10
13	14
8	9
9	13
9	9
10	12
7	8
12	10
8	7
9	14
9	12
9	10B
7	14
14	14
14	14
1	14
7	14
14	14
14	14
14	13
10B	13
10B	12
7	12
8	11
14	10B
14	9
10B	10
8	10B
14	14
8	10B
13	8
11	8
8	10
7	10B
10B	10B
9	10
13	10
9	9
7	9
14	8
14	8
9	10
9	12
7	8
7	12
14	10
10	10
7	9
14	9
14	9
14	14
14	14
10	8
10	10
8	14
12	10B
7	8
14	14
9	14
8	14
8	9
7	10B
9	10B
8	7
10	7
11	8
7	8
10B	7
14	14
10	14
10	12
8	7
10B	13
8	11
14	10B
12	14
10B	8
8	13
8	7
10	14
7	10B
14	10B
10	10B
14	9
14	9
8	14
10B	14
10B1	14
8	14
9	14
7	14
14	14
12	14
10	14
10	10B
10B	9
12	13
7	13
13	12
8	9
7	9
14	14
11	14
10B	14
10B	14
11	14
12	14
7	11
9	9
9	7
14	14
14	13
14	10B
9	10B
10B	10B
14	8
14	8
8	7
8	7
7	10B
9	12
10B	14
14	7
12	14
14	9
14	9
14	7
14	14
13	14
10B	14
10	14
9	14
8	14
8	14
10B	12
10B	8
	10B
9	14
14	13
13	9
10	9
9	9
9	10B
14	14
14	14
13	14
14	14
14	14
14	14
11	14
12	14
8	8
14	8
10	14
9	11
10B	13
10	7
14	8
9	14
14	11
14	8
10B	10
10	13
9	9
14	10B
14	14
7	7
14	8
14	8
10B	14
11	7
7	8
8	7
10B	8
10B	7
9	14
11	14
10	14
14	13
14	10B
14	12
14	7
14	8
10B	9
13	7
8	9
8	14
14	12
14	10B
14	13
10B	7
14	12
10	14
8	7
10B	14
14	14
9	13
8	10B
13	8
14	12
10B	7
10	14
7	14
10B	14
10	14
12	14
8	14
14	14
14	8
14	14
14	14
14	14
10B	14
10B	14
9	14
13	13
13	8
14	8
12	7
8	13
10B	14
14	10B
14	10B
14	8
10	9
7	9
13	14
9	14
10B	14
10	14
14	10B
10	8
10B	10B
8	8
14	7
14	7
9	7
10	14
7	14
9	13
8	8
8	10B
10
