# Supplementary material for: Rif1 inhibits replication fork progression and controls DNA copy number in Drosophila
Source: eLife. 2018 Oct 2;7:e39140. doi: 10.7554/eLife.39140 (PMC6185109; doi:10.7554/eLife.39140)
Supplement: Figure 4—source data 1. [file elife-39140-fig4-data1.xlsx]

## Sheet: Sheet1
		Wild type				SuUR-				Rif1-
10B		1	1	1	0.98	1	1	1	1	1	1	1	1
11		1	1	1	0.93	1	1	1	0.99	0.99	1	1	1
12		1	1	1	1	1	0.98	1	1	1	0.98	1	1
13		0.27	0.5	0.35	0.24	1	1	1	1	0.96	1	0.98	1
