# Supplementary material for: Rif1 inhibits replication fork progression and controls DNA copy number in Drosophila
Source: eLife. 2018 Oct 2;7:e39140. doi: 10.7554/eLife.39140 (PMC6185109; doi:10.7554/eLife.39140)
Supplement: Figure 5—figure supplement 1—source data 1. [file elife-39140-fig5-figsupp1-data1.xlsx]

## Sheet: Sheet1
Wild type	Rif1-
6328.6	-1536.26		*combined data for two biological replicates
6485.22	-223.949
4178.34	433.901
5317.36	723.811
3373.14	1561.49
8174.36	1576.5
6090.77	2255.94
6402.48	2616.55
7663.11	2700.45
4661.35	2808.56
10632.8	2816.76
8418.34	2969.55
4743.03	2992.12
6970.52	3156.25
12305.9	3269.25
10811.3	3323.86
9230.5	3622.35
7829.49	3740.26
8830.43	3916.7
7123.65	4099.35
1612.39	4273.72
5220.55	4294.64
5667.62	4354.64
9876.08	4440.45
8281.92	4543.86
1585.94	4778.05
15753.7	4896.79
2988.84	4974.99
2068.66	5135.14
8800.84	5138.82
11871.4	5211.46
7504.84	5221.39
7427.76	5366.82
1467.81	5472.76
8211.97	6040.49
5577.07	6124.41
3573.22	6327.74
4482.12	6439.08
2811.26	6463.7
4352.48	6540.92
5950.68	6701.39
6987.19	6873.21
7016.84	6961.18
5485.64	7013.86
5073.69	7206.71
3383.68	7257.98
2833.82	7540.25
7164.1	7717.28
3636.57	7758.87
7211.48	7765.44
2722.07	7866.51
4134.81	7887.06
4277.32	7926.23
6254.32	8040.79
8772.24	8086.22
7132.38	8390.97
5442.52	8407.25
8977.17	8748.99
4861.24	8795.86
4784.84	9156.43
5942.34	9378.16
5572.11	9489.31
7171.16	12326
5899.16	9217.93
3189.49	9540.67
5446.4	10360.4
3164.66	13032.9
6361.65	12244.2
5547.99	8170.73
2048.3	8908.82
942.519	9093.8
1119.56	11409.8
1673.71	2674.51
1863.98	12237.7
2145.67	9121.67
2211.79	7214.81
2384.79	4360.8
2387.9	10873
2436.58	10430.9
2800.83	8429.42
3205.52	11242.7
3412.87	11103.8
3461.6	7570.23
3467.18	8117.1
3493.11	11934.7
3553.68	12148.6
3624.58	10467.8
3640.12	4258.06
3690.98	5278.1
3957.58	8413.75
3976.68	7711.8
4055.8	8013.15
4092.2	11591.8
4152.81	5910.23
4167.45	12102
4175.6	6093.07
4417.94	6527.89
4536.69	8629
4568.47	8217.4
4627.36	8270.58
4651.87	7635.31
4774.63	-722.555
4863.89	3350.43
4967.25	7966.23
4974.76	6451.2
5011.1	3569.11
5034.52	1253.08
5160.32	5314.86
5221.29	9323.64
5366.45	7310.68
5420.52	7248.94
5513.94	6339.23
5573.45	2443.88
5584.96
5612.93
5646.15
5652.79
5711.89
5739.61
5764.11
5809.7
5845.28
5878.49
5887.39
5892.23
5899.84
5955.74
5974.63
6103.03
6131.53
6234.87
6241.51
6326.07
6423.92
6479.72
6486.41
6565.19
6598.15
6672.28
6693.06
6886.66
7048.17
7158.5
7202.17
7238.56
7280.14
7377.75
7394.49
7494.39
7563.49
8088.73
8352.12
8613.91
9589.59
9628.03
9837.29
