# Supplementary material for: Rif1 inhibits replication fork progression and controls DNA copy number in Drosophila
Source: eLife. 2018 Oct 2;7:e39140. doi: 10.7554/eLife.39140 (PMC6185109; doi:10.7554/eLife.39140)
Supplement: Figure 6—figure supplement 1—source data 1. [file elife-39140-fig6-figsupp1-data1.xlsx]

## Sheet: Sheet1
Biological replicate 1									Biological replicate 2
ORR_10b	SUUR_10b	ORR_11	SUUR_11	ORR_12	SUUR_12	ORR_13	SUUR_13		ORR_10b_2	SUUR_10b	ORR_11_2	SUUR_st11	ORR_12_2	SUUR_st12	ORR_13_2	SUUR_st13
25705.5	9875.55	5316.77	-8074.23	34050.3	-461.963	3047.26	-213.612		17796.7	-12289.2	21246.4	6601.71	-1281	2284.59	-6347.14	-2144.93
19542.3	7709.5	6837.69	1712.69	42068.6	-828.413	14425.8	-38.412		18320.6	-11486.4	21371.2	7235.82	224.15	3162.23	-3401.33	191.859
25659.1	14274.5	7742	2414.32	33336.3	3187.99	18848.2	235.558		19066.5	-8979.58	21410.5	7759.48	1738.81	3341.91	-1127.77	258.539
-416.434	15897.5	11065.2	5046.42	31865.1	22600.9	29385.4	273.358		19698.9	-1331.74	21689.7	8379.13	2397.71	4666.52	9113.79	5154.55
31287.6	25011.1	14449.1	8272.75	33797.3	4045.43	31471.7	336.408		19775.9	486.56	21870.4	8380.63	3544.9	5105.18	11639	-1152.26
14252.6	26755.3	15293.7	8357.25	38503.1	-887.453	31696.5	600.748		20423.3	767.43	21926.7	8474.61	3655.67	6225.29	11790.9	-1950.27
31201.2	13918.6	16579.4	9176.64	30040.6	3080.95	31725.9	762.948		20781.3	1101.73	21959.9	8580.56	4605.9	6532.13	11800.9	732.959
30938.4	12617.4	19619.8	10008.6	38427.9	11222.6	34752.5	972.878		20877	4826.04	22040.3	8829.65	5823.52	7017.22	12287.3	88.269
25892.5	25268.4	19763.4	10277.9	24970.9	-412.913	35922.6	1365.7		21764.8	5002.2	22131.2	9230.24	7418.89	7438.7	12364.4	3965.64
6733.26	34826.9	20036.7	10827.6	14361.2	3795.12	43766	1490.93		21828.3	5700.37	22140.3	9253.86	7599.05	7440.48	13869.6	-972.371
12821.8	16272.2	22201.4	10873.2	23955.1	3276.2	48113	1772.01		22646.4	6071.36	22166.7	9422.52	7940.87	8300.3	14396.9	487.889
25196.6	48492.8	22892.1	11306.8	38538.1	4243.21	55195.9	1971.13		22858.1	6546.56	22174.1	9450.91	9080.81	8790.92	14851.4	177.609
11992	21755.4	24122	11647.2	36210.9	2107.79		2023.23		23282.6	7361.69	22183.9	9690.36	12895.3	9020.48	15386.1	-940.481
34565.9	35762.4	24961.3	12244.8	33372.1	-1204.82		2092.98		23405.9	7536.52	22187.1	10040	14486	9101.63	15513.2	3956.55
24241.2	7933.38	26505.6	13513.4	29099	4586.8		2125.32		23427.5	7624.14	22212.3	10109.2	16595.4	9295.12	15867.7	2387.13
29138.8	8872.88	27259.2	13712.9	26160.5	9096.7		2167.14		23583.7	7881.52	22217.9	10131.6	17451.2	9557.42	16384.8	4866.13
24468.5	17579.3	27654.4	15752.4	36515.8	3398.68		2649.43		24014.8	7931.6	22223.2	10260	18419.8	9585.18	16965.5	-199.721
10282	663.369	28132.5	16194	38944.4	12833.5		2824.08		24110.6	8130.77	22223.9	10332.9	18690.5	9730.15	17120.7	-24.261
37931.6	43189	30223.5	16270.9	42021.9	9475.07		3034.45		24114	8339.41	22228.5	10359.1	18802.6	10195.2		625.289
31710.3	47228.2	30315.8	16360.9	20979	-830.293		3221.19		24195.4	8395.06	22229.2	10406.1	19073.5	10558.4		6214.94
13943.9	2574.67	30484.2	16843.4	29152.5	5669.63		3355.73		24206.9	8494.97	22229.7	10420.4	19274.9	10583.3		4050.26
17427.7	10028.8	30548.7	16972.7	28733	6230.06		3377.46		24341.9	8552.37	22235.1	10637.5	19627.4	10762		1055.93
22887.6	-632.421	35331.8	17720.7	19569.8	17641.1		3413.89		24577.6	8616.44	22237	10680.9	20035.8	10982.2		5751.39
7461.61	27919.8	35552.9	18406.5	33114.5	16763.5		4311.76		24585.9	9020.58	22237.9	10745.1	20396.8	10992.4		738.219
19800.5	19112.4	36420.3	18878.5	36684.2	7708.7		5103.81		24633.4	9141.99	22238.2	10835.6	21007.5	11165.2		4502.41
41109.5	23129.8	36801.1	19870.5	26465.4	9767.63		5259.76		24641.7	9270.23	22241.9	10912.4	21536.6	11354.8		3074.13
8713.03	34150.3	37178.4	19962	38714.4	16322.4		6343.58		24714.7	9314.26	22242.5	10933.5	21928.5	11452		13539.2
26751.8	50398.8	37683.6	20723.3	37823.5	6002.28		7395.9		24719.4	9488.17		11106	22075	11500.7		2984.99
19206.4	33898.6	38309.1	20903.5	29887.2	12097.3				24722.9	9741.26		11147.6	22147.9	11594		-2117.8
34920.8	13182.1	38393.2	21346.3	29900.3	5991.07				24727.9	10027.8		11326.1	22339.7	11675.7		-3050.27
2261.42	20190.5	39202.3	21632.4	3577.74	8900.51				24746.8	10038.4		11337.1	22340.1	11699.7		3658.04
31522.4	7186.58	39513.5	22153.7	16968.8	9717.2				24811.2	10062.3		11359.7	22352.4	11897.6		-1021.31
25563	32096.7	39515.6	22685	8553.13	3925.82				24813.8	10250.5		11429	22492.7	12004.1		1264.93
38519.6	-1470.3	39659.9	22938.6	9521.75	16418.1				24814.5	10593.5		11547	22734.4	12045.7		6884.74
26544.9	34282.8	39838.4	23623.5	13613	23497.4				24815.7	10599.5		11568.8	22813.6	12169.3		761.229
37413.9	4821.52	39887.9	24007.8	33167.7	196.877				24850.6	10643.3		11652.3	22873.7	12191		-2142.48
16411.9	4376.48	40258.9	24178.5	25320.9	8636.46				24858.6	10846		11728.4	22896.7	12247.2		-2020.94
14681.4	35367.6	40417.9	24363.8	30593.2	5409.93				24884.3	10861.1		11795.8	22943	12347.1		-2138.11
11373.1	7907.31	40541.2	24420.3	15711.6	11991.1				24890.4	11072.3		11807.6	22943.2	12364.5		-1783.64
30796.7	7883.74	40577	25275.4	22129	-2818.48				24963	11307.9		11807.6	22951.1	12433.2		-2339.24
36094.4	39382.8	41563.6	25660.4	45192.6	11680.8				25002.2	11479.8		11812.7	23007.4	12512.3		643.729
25563.9	45384.4	41769.9	25936.4	7822.05	13861.1				25005.2	11491.2		11823.4	23182.9	12541		-2169.51
34597.5	32871.4	41965.4	26086.5	11550	5817.6				25024.1	11552.5		11831.4	23254.7	12556.5		1220.71
27398.3	43637.6	42068	27049.7	29631	10422.6				25066	11616.7		11863.8	23280.3	12573.9
27591.9	37917.9	42360.1	27073.2	18464	8925.96				25101.6	11674.2		11918.1	23292.3	12583.7
10125.8	13449.6	42610	27249.5		-794.613				25102.3	11676.2		11942.8	23331.4	12604.3
24749.9	10678	42715.1	27605.3		5586.05				25115.2	11788.1		11959.4	23469.7	12635.5
29675.2	19568.8	42795.7	27705.3		15491.1				25126.3	11792		12006.8	23501.5	12666.4
22355.3	32309.6	42811.7	27853.8		2972.75				25130.3	11817.2		12063.8	23533.6	12862
14936.3		42889.7	27996.5		7863.61				25138.7	11870.7		12129.8	23550.9	13079.2
34401.8		42967.5	28328.1		7820.69				25139.1	11889.1		12189.5	23550.9	13099.8
25326.9		43062.2	29118.4		11946.5				25152.9	11956.9		12191		13127
15942.4		43372	29574.6		3679.25				25165.8	11990.2		12222.2		13154.5
8408.54		43444	29879.6		6197.88				25176.3	12004.3		12259
27624.5		43579.2	31871		-2635.66				25194.1	12038.3		12337.5
41350.1		43584.8	32067.3		5700.2				25202.9	12039		12340
4314.62		43809.6	32374.1		8837.09				25211.7	12068.4		12345.3
11128.2		43834.5	33441.4		12001.2				25215.4	12084.5		12346.3
9520.29		43908.9	34546.3		5117.54				25243.6	12140.8		12358.2
31082.1		44214.9	34562.8		12711.2				25247.5	12142.6		12508.8
18901		44278.1	35858.2		3297.33				25258.7	12189.8		12514.6
31752.1		44413	35990.6		9636.83				25299.6	12204.5		12608.5
23316		44467.1	36136.2		-1869.71				25303.6	12265.9
18433.5		44907.7	36691.3		7087.03				25303.9	12287.3
26701.3		45005.8	36727.9						25307.2	12301.4
18603.7		45433.8	37727.1						25311.9	12334
22796.3		45434.6	38078.9						25320.7	12349.3
-673.874		46503.8	38174.2						25321.3	12349.8
38965.6		46568.4	39232.2						25337.3	12350.8
30417		46676.4	39277.4						25341.8	12369.1
31286.3		46749.4	39378.8						25363.7	12374
37268.6		46752.6	39609						25364.5	12377.9
19550.1		46823.6	39916.8						25366	12406.3
30467.5		46955.1	40742.7						25367.6	12421.8
27538.4		46962.3	40962						25370.3	12433.6
10928.3		47289.5	41061.4						25377.2	12444.8
35425.9		47306.9	41400.4						25381.9	12456.3
31156.7		47627.1	41559.2						25381.9	12475.5
37647.7		47662.4	41898.3						25381.9	12483.7
27735.1		47675	41980.2						25381.9	12484
1388.19		47894.4	42022						25381.9	12495.4
17893.2		48312.9	42548.4						25381.9	12503.2
13311		48723.9	42791.6						25381.9	12516.3
9174.94		48734.8	43621.4							12519.9
24457.5		48829.5	44146							12535.4
33994.1		48936.1	44468							12540.1
5524.81		49002.5	45233.8							12542.7
29368.9		49110	45425.3							12549.1
13746.2		49226.3	45767.5							12556.1
20768.4		49248.8	45780.7							12557.5
57.956		49270.9	45849							12572.3
17790.6		49274.1	46081.1							12576.9
6318.41		49436.7	46294.1							12590.8
12270.1		49567.2	46299.7							12595.3
27260.5		49689.5	47023.6							12598.2
14259.9		49887.3	47085.7							12606
14427.1		49944.6	47299.2							12614.5
28207.7		50145.6	48738							12615
19412		50802.1	48823.6							12625.9
22182.8		51122.2	49889.7							12635.8
29209.3		51352.8	50643.4							12644.3
-1791.06		51399.7	51130.4							12647.2
13371.3		51716.6	51169.6							12649.4
15124.8		51863.5	51368.4							12652.3
-7450.3		52038.2								12658.5
24843.7		52466.7								12664.9
5758.6		53026.4								12666.5
24534.5										12670.1
9451.13										12672.6
31838.2										12672.9
26569.2										12674.6
7103.78										12674.6
21405.1										12674.6
11938.4										12674.6
29258.9										12674.6
38767.2										12674.6
14976										12674.6
34313.9										12674.6
35372.6										12674.6
11659.9										12674.6
16813										12674.6
18243
26993.6
18820.3
40760
7508.89
5249.47
3283.03
-1414.99
7217.02
40869.8
15538.7
5855.57
9550.44
698.136
20366.1
24619
17217.1
