# Supplementary material for: Rif1 inhibits replication fork progression and controls DNA copy number in Drosophila
Source: eLife. 2018 Oct 2;7:e39140. doi: 10.7554/eLife.39140 (PMC6185109; doi:10.7554/eLife.39140)
Supplement: Figure 6—figure supplement 2—source data 1. [file elife-39140-fig6-figsupp2-data1.xlsx]

## Sheet: Sheet1
Rif1-Biotin PLA
0	1	2	3+
0.91678	0.0750341	0.00545703	0.00272851		*data is combined for two biological replicates
0.58867	0.184729	0.0960591	0.130542
Biotin-Biotin PLA
0	1	2	3+
0.979355	0.0206452	0	0
0.480687	0.286123	0.09299	0.1402
