# Supplementary material for: Rif1 inhibits replication fork progression and controls DNA copy number in Drosophila
Source: eLife. 2018 Oct 2;7:e39140. doi: 10.7554/eLife.39140 (PMC6185109; doi:10.7554/eLife.39140)
Supplement: Figure 7—source data 1. [file elife-39140-fig7-data1.xlsx]

## Sheet: Sheet1
	Rif1^PP1			Rif1^PP1/CyO
11A	1.41	0.86	0.93	0.32	0.22	0.31
35D	1.59	1.14	0.94	0.22	0.17	0.17
36D	1.09	0.91		0.09	0.11	0.09
70C	1.39	0.94	0.58	0.18	0.13	0.16
75C	1.1	1		0.31	0.27	0.3
3LHet	1.14	0.83	0.91	0.07	0.04	0.03
