# Supplementary material for: Rif1 inhibits replication fork progression and controls DNA copy number in Drosophila
Source: eLife. 2018 Oct 2;7:e39140. doi: 10.7554/eLife.39140 (PMC6185109; doi:10.7554/eLife.39140)
Supplement: Supplementary file 1. [file elife-39140-supp1.xlsx]

## Sheet: Sheet1
Figure 1 - Supplement 3: Underreplicated regions called by CNVnator
chr	start	end	OregonR	SuUR-	SuURΔSNF	Rif1-	Rif1PP1	Rif1PP1/+
chrX	9001	52000	+		+
chrX	80001	108000	+
chrX	2976001	3125000	+					+
chrX	12052001	12382000	+					+
chrX	14062001	14101000	+
chrX	14292001	14563000	+					+
chrX	20686001	20957000	+					+
chrX	20962001	20998000	+					+
chrX	21525001	21544000	+	+		+		+
chrX	21667001	21807000	+	+	+			+
chrX	21814001	21829000	+					+
chrX	21843001	21895000	+	+	+			+
chrX	21904001	21965000	+	+	+			+
chrX	21972001	22433000	+	+	+		+	+
chrX	22611001	22787000	+	+				+
chrX	23053001	23064000	+	+
chrX	23175001	23205000	+					+
chrX	23285001	23535000	+	+	+			+
chr2L	4538001	4777000	+
chr2L	8013001	8024000	+
chr2L	11587001	11777000	+
chr2L	12781001	12799000	+
chr2L	14722001	14946000	+					+
chr2L	15306001	15721000	+					+
chr2L	15960001	16154000	+					+
chr2L	16161001	16217000	+					+
chr2L	16948001	17199000	+					+
chr2L	17201001	17312000	+					+
chr2L	17520001	17951000	+		+			+
chr2L	19345001	19358000	+
chr2L	20128001	20199000	+	+	+			+
chr2L	21833001	22085000	+					+
chr2L	22284001	22522000	+					+
chr2L	22614001	22752000	+					+
chr2L	23198001	23406000	+	+	+	+	+	+
chr2L	23415001	23513712	+		+	+		+
chr2R	1	699000	+	+	+	+	+	+
chr2R	1194001	1206000	+
chr2R	1379001	1501000	+	+	+			+
chr2R	1557001	1589000	+
chr2R	1609001	1700000	+					+
chr2R	1707001	1968000	+	+	+			+
chr2R	1975001	2163000	+	+	+	+		+
chr2R	2170001	2409000	+	+	+	+		+
chr2R	2421001	2500000	+	+	+			+
chr2R	2508001	2546000	+	+	+			+
chr2R	2551001	3506000	+	+		+	+	+
chr2R	3513001	3871000	+	+	+	+	+	+
chr2R	4414001	4425000	+	+
chr2R	4871001	5057000	+					+
chr2R	6283001	6476000	+	+				+
chr2R	10623001	10637000	+			+
chr2R	23133001	23313000	+					+
chr3L	4850001	5034000	+					+
chr3L	5043001	5075000	+					+
chr3L	13559001	13805000	+					+
chr3L	15196001	15475000	+					+
chr3L	18190001	18431000	+					+
chr3L	22577001	22627000	+
chr3L	22803001	22820000	+
chr3L	23157001	23173000	+		+
chr3L	23355001	23538000	+					+
chr3L	23550001	23679000	+
chr3L	23775001	24005000	+					+
chr3L	24056001	25075000	+	+	+			+
chr3L	25135001	25838000	+	+	+			+
chr3L	25844001	25965000	+		+			+
chr3L	26085001	26161000	+		+			+
chr3L	26166001	26311000	+	+				+
chr3L	26315001	26705000	+	+	+		+	+
chr3L	27391001	27815000	+			+	+	+
chr3L	28042001	28110227	+
chr3R	1	1257000	+	+	+	+	+	+
chr3R	1266001	1655000	+	+			+	+
chr3R	1664001	2569000	+	+	+		+	+
chr3R	2572001	2824000	+	+	+	+	+	+
chr3R	2831001	3034000	+	+	+	+	+	+
chr3R	3040001	3129000	+	+		+	+	+
chr3R	3136001	3533000	+	+	+		+	+
chr3R	3674001	3692000	+	+
chr3R	3827001	3842000	+	+
chr3R	3890001	4175000	+		+			+
chr3R	6159001	6327000	+
chr3R	6515001	6624000	+
chr3R	7572001	7714000	+		+			+
chr3R	10919001	11142000	+		+			+
chr3R	16712001	16948000	+					+
chr3R	19704001	19715000	+
chr3R	22142001	22303000	+			+
chr3R	28020001	28252000	+					+
