# Supplementary material for: Rif1 inhibits replication fork progression and controls DNA copy number in Drosophila
Source: eLife. 2018 Oct 2;7:e39140. doi: 10.7554/eLife.39140 (PMC6185109; doi:10.7554/eLife.39140)
Supplement: Supplementary file 2. [file elife-39140-supp2.xlsx]

## Sheet: Sheet1
Supplemental Table 2
			half max position
Figure 4 - Supplement 2
Wild type		max (log2)	left arm (bp)	right arm (bp)	half max total (bp)	fold change relative to wild type
7F	chrX	3.911	8439400	8518500	79100	1
22B*	chr2L	1.961	1888300	1937200	48900	1
30B	chr2L	1.798	9504800	9587600	82800	1
34B	chr2L	2.33	13371800	13438500	66700	1
62D	chr3L	1.678	2231600	2314900	83300	1
66D	chr3L	5.494	8694700	8765800	71100	1
			half max position
SuUR-		max (log2)	left arm (bp)	right arm (bp)	half max total (bp)
7F	chrX	3.528	8425000	8528900	103900	1.31353
22B*	chr2L	NA	NA	NA	NA	NA
30B	chr2L	1.682	9506100	9607700	101600	1.22705
34B	chr2L	2.355	13364800	13473500	108700	1.62969
62D	chr3L	1.745	2221200	2342400	121200	1.45498
66D	chr3L	4.88	8685700	8778600	92900	1.30661
			half max position
Rif1-		max (log2)	left arm (bp)	right arm (bp)	half max total (bp)
7F	chrX	3.824	8420700	8540700	120000	1.51707
22B*	chr2L	NA	NA	NA	NA	NA
30B	chr2L	1.807	9496800	9607300	110500	1.33454
34B	chr2L	2.474	13361400	13474400	113000	1.69415
62D	chr3L	1.719	2217900	2335500	117600	1.41176
66D	chr3L	5.465	8679700	8783500	103800	1.45992
*22B is a strain specific amplicon present in Oregon R and not SuUR and Rif1 mutants
